# Supplementary material for: Unveiling the mechanisms of epoxide polymerization with N–Al adduct catalysts: a comprehensive experimental and theoretical investigation
Source: Royal Society of Chemistry journal article supplement (doi:10.1039/d3py00482a), 2023-01-01
Supplement: d3py00482a1.pdf [file d3py00482a1.pdf]

# Supporting Information

Unveiling the Mechanisms of Epoxide Polymerization with N—Al Adduct Catalysts: A Comprehensive Experimental and Theoretical Investigation.

Niloofar Safaie<sup>#1</sup>, Austin Rodriguez<sup>#2</sup>, Gourhari Jana<sup>#2</sup>, Jessica Smak<sup>2</sup>, Jose L. Mendoza-Cortes<sup>\*2</sup>, Robert C. Ferrier, Jr.<sup>\*2</sup>

1. Department of Chemistry, Michigan State University, East Lansing MI 48824

2. Department of Chemical Engineering and Materials Science, Michigan State University, East Lansing MI, 48824.

\*Jose L. Mendoza-Cortes, jmendoza@egr.msu.edu

\*Robert C. Ferrier, ferrier5@egr.msu.edu

‡NS, AR, and GJ contributed equally.

## Table of Contents

|                                                 |    |
|-------------------------------------------------|----|
| Experimental Details.....                       | 2  |
| Computationally Estimated Parameters.....       | 41 |
| XYZ coordinates of the Optimized Catalysts..... | 43 |

## Experimental Details.

$^1\text{H}$  NMR and  $^{13}\text{C}$  NMR spectra for catalysts:

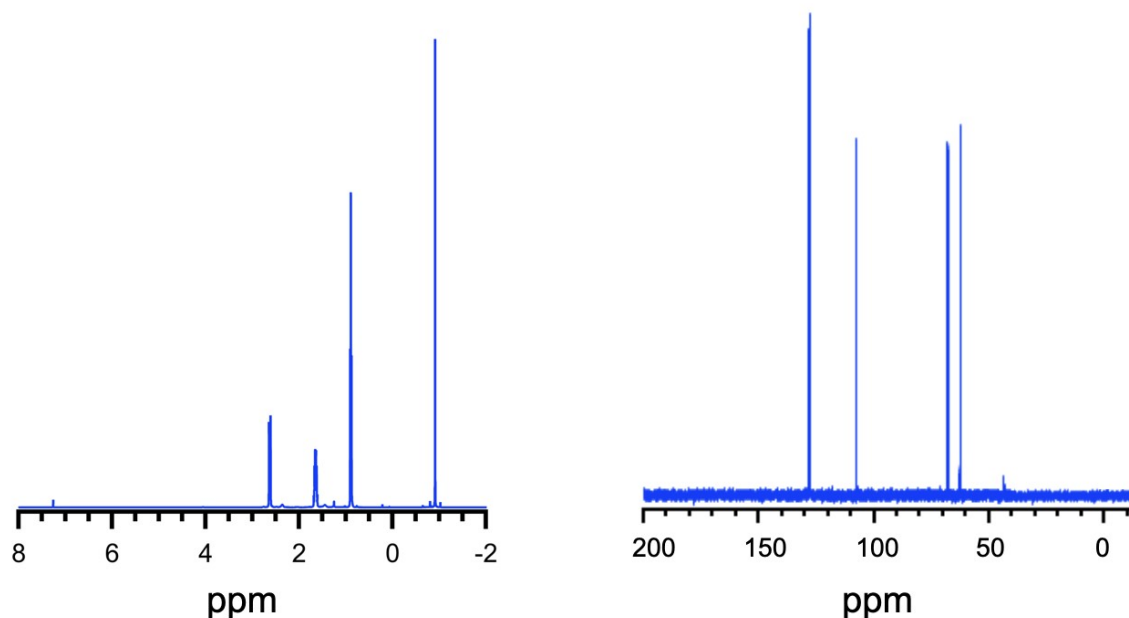

**Figure S 1**  $\text{Pr}_3\text{NAIME}_3$ :  $^1\text{H}$  NMR (500 MHz,  $\text{CDCl}_3$ )  $\delta$  2.66 – 2.59 (m, 6H)  ${}_3[\text{CH}_3\text{CH}_2\text{CH}_2]\text{NAI}[\text{CH}_3]_3$ , 1.70 – 1.59 (m, 6H)  ${}_3[\text{CH}_3\text{CH}_2\text{CH}_2]\text{NAI}[\text{CH}_3]_3$ , 0.89 (t,  $J = 7.3$  Hz, 9H)  ${}_3[\text{CH}_3\text{CH}_2\text{CH}_2]\text{NAI}[\text{CH}_3]_3$ , -0.91 (s, 9H)  ${}_3[\text{CH}_3\text{CH}_2\text{CH}_2]\text{NAI}[\text{CH}_3]_3$ .  $^{13}\text{C}$  NMR (126 MHz,  $\text{CDCl}_3$ )  $\delta$  107.95  ${}_3[\text{CH}_3\text{CH}_2\text{CH}_2]\text{NAI}[\text{CH}_3]_3$ , 68.11  ${}_3[\text{CH}_3\text{CH}_2\text{CH}_2]\text{NAI}[\text{CH}_3]_3$ , 62.87  ${}_3[\text{CH}_3\text{CH}_2\text{CH}_2]\text{NAI}[\text{CH}_3]_3$ , 43.62  ${}_3[\text{CH}_3\text{CH}_2\text{CH}_2]\text{NAI}[\text{CH}_3]_3$ .

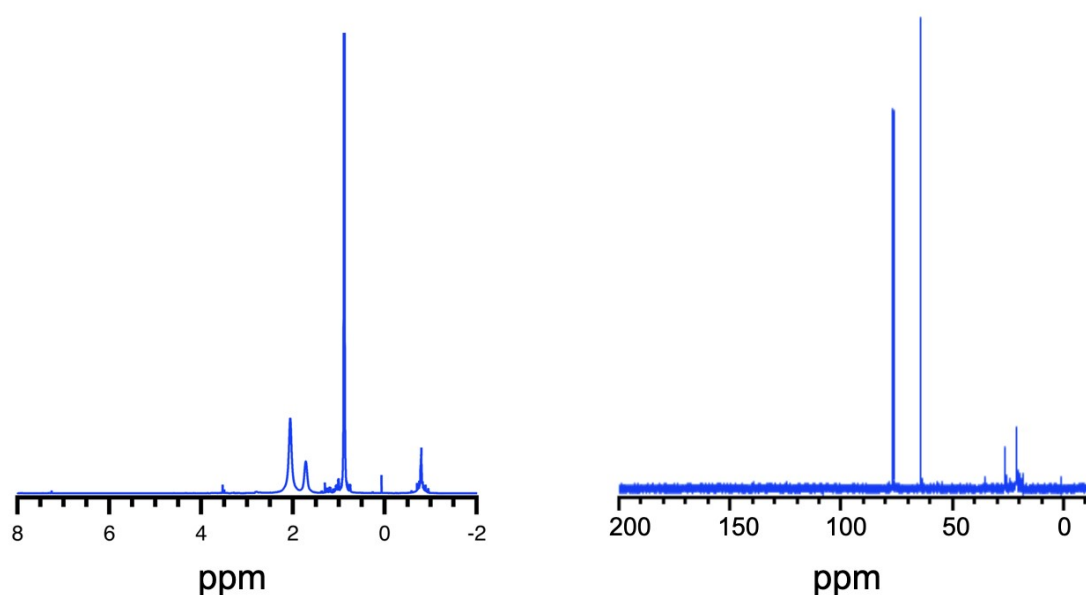

**Figure S 2**  $i\text{Bu}_3\text{NAIEt}_3$ :  $^1\text{H}$  NMR (500 MHz,  $\text{CD}_2\text{Cl}_2$ )  $\delta$  2.25 (b, 6H)  ${}_3[(\text{CH}_3)_2\text{CHCH}_2]\text{NAI}[\text{CH}_2\text{CH}_3]_3$ , 1.86-1.83 (b, 3H)  ${}_3[(\text{CH}_3)_2\text{CHCH}_2]\text{NAI}[\text{CH}_2\text{CH}_3]_3$ , 1.09 (t,  $J = 8.0$  Hz, 9H)  ${}_3[(\text{CH}_3)_2\text{CHCH}_2]\text{NAI}[\text{CH}_2\text{CH}_3]_3$ , 0.94 (d,  $J = 6.6$  Hz, 18H)  ${}_3[(\text{CH}_3)_2\text{CHCH}_2]\text{NAI}[\text{CH}_2\text{CH}_3]_3$ , 0.26  ${}_3[(\text{CH}_3)_2\text{CHCH}_2]\text{NAI}[\text{CH}_2\text{CH}_3]_3$ .

(q,  $J = 8.0$  Hz, 6H)  ${}_{3}[(\text{CH}_3)_2\text{CHCH}_2]\text{NAI}[\text{CH}_2\text{CH}_3]_3$ .  ${}^{13}\text{C}$  NMR (126 MHz,  $\text{cd}_2\text{cl}_2$ )  $\delta$  64.38  
 ${}_{3}[(\text{CH}_3)_2\text{CHCH}_2]\text{NAI}[\text{CH}_2\text{CH}_3]_3$ , 25.77  ${}_{3}[(\text{CH}_3)_2\text{CHCH}_2]\text{NAI}[\text{CH}_2\text{CH}_3]_3$ , 19.21  
 ${}_{3}[(\text{CH}_3)_2\text{CHCH}_2]\text{NAI}[\text{CH}_2\text{CH}_3]_3$ , 13.51  ${}_{3}[(\text{CH}_3)_2\text{CHCH}_2]\text{NAI}[\text{CH}_2\text{CH}_3]_3$ , 8.64  
 ${}_{3}[(\text{CH}_3)_2\text{CHCH}_2]\text{NAI}[\text{CH}_2\text{CH}_3]_3$ , 0.52  ${}_{3}[(\text{CH}_3)_2\text{CHCH}_2]\text{NAI}[\text{CH}_2\text{CH}_3]_3$ .

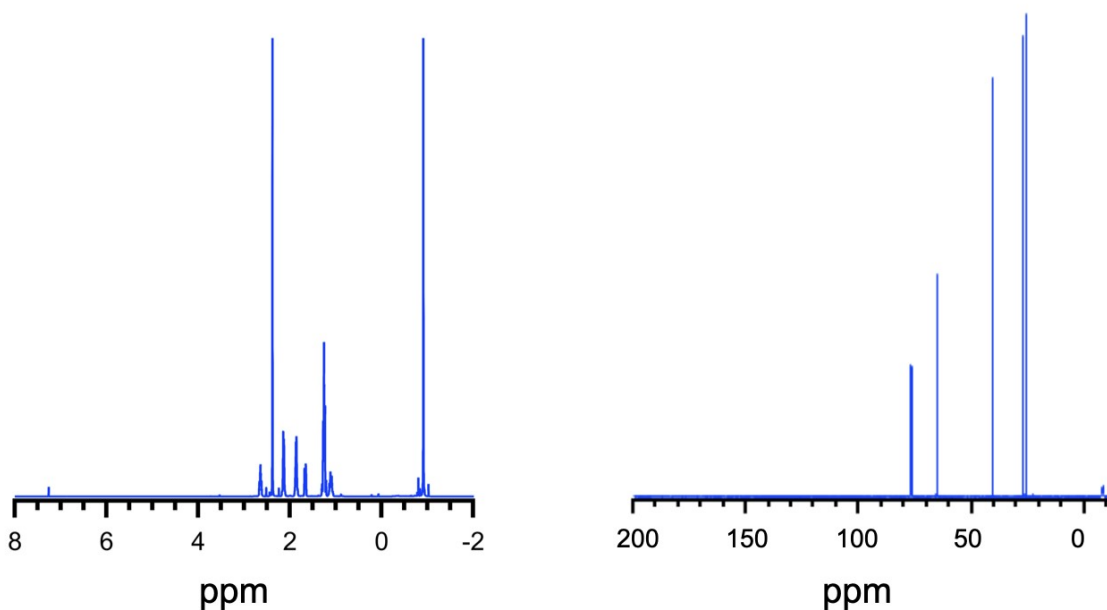

**Figure S 3**  ${}^1\text{H}$  NMR and  ${}^{13}\text{C}$  NMR for  $\text{CyMe}_2\text{NAIme}_3$ :  ${}^1\text{H}$  NMR (500 MHz,  $\text{cdcl}_3$ )  $\delta$  2.70–2.58 (m, 1H)  ${}_{3}[(\text{CH}_3)_2\text{Cy}]\text{NAI}[\text{CH}_3]_3$ , 2.38 (s, 6H),  ${}_{3}[(\text{CH}_3)_2\text{Cy}]\text{NAI}[\text{CH}_3]_3$ , 2.19-2.07 (m, 2H), 1.92-1.80 (m, 2H), 1.69-1.62 (m, 2H), and 1.35-1.04 (m, 6H)  ${}_{3}[(\text{CH}_3)_2\text{Cy}]\text{NAI}[\text{CH}_3]_3$ , -0.92 (s, 9H)  ${}_{3}[(\text{CH}_3)_2\text{Cy}]\text{NAI}[\text{CH}_3]_3$ .  ${}^{13}\text{C}$  NMR (126 MHz,  $\text{cdcl}_3$ )  $\delta$  65.75, 41.08, 27.23 and 25.95,  ${}_{3}[(\text{CH}_3)_2\text{Cy}]\text{NAI}[\text{CH}_3]_3$  25.91  ${}_{3}[(\text{CH}_3)_2\text{Cy}]\text{NAI}[\text{CH}_3]_3$ , -7.95  ${}_{3}[(\text{CH}_3)_2\text{Cy}]\text{NAI}[\text{CH}_3]_3$ .

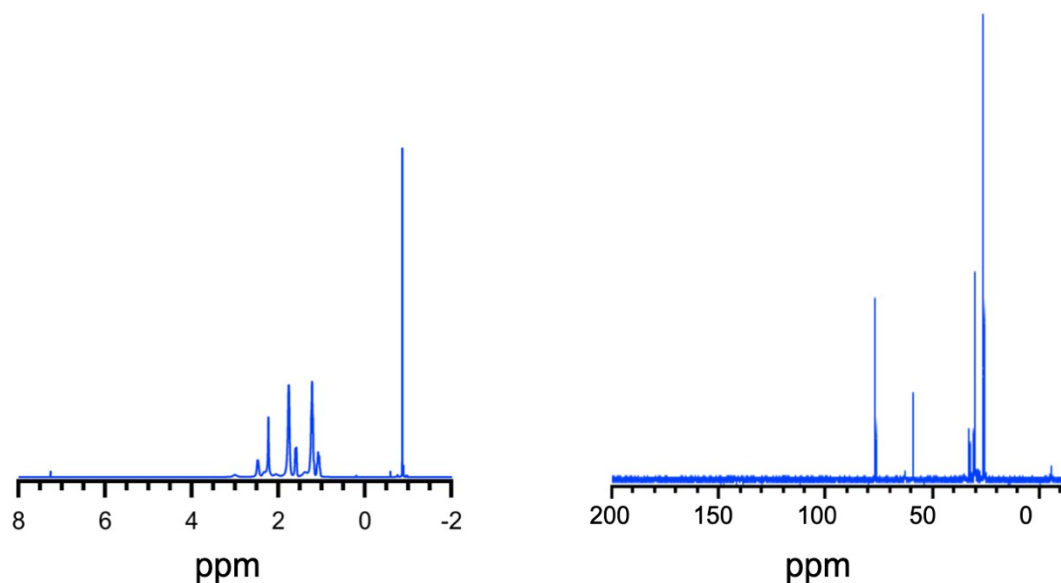

**Figure S 4**  ${}^1\text{H}$  NMR and  ${}^{13}\text{C}$  NMR for  $\text{Cy}_2\text{MeNAIme}_3$ :  ${}^1\text{H}$  NMR (500 MHz,  $\text{cdcl}_3$ )  $\delta$  2.47 (m, 2H), 2.21 (s, 3H), and 1.98-1.03 (m, 12H)  ${}_{3}[(\text{CH}_3)_2\text{Cy}]\text{NAI}[\text{CH}_3]_3$ , 0.87 (s, 9H)  ${}_{3}[(\text{CH}_3)_2\text{Cy}]\text{NAI}[\text{CH}_3]_3$ .  ${}^{13}\text{C}$  NMR

(126 MHz,  $\text{cdCl}_3$ )  $\delta$  63.13, 59.44, 32.68, and 30.70  ${}_3[(\text{CH}_3)_2\text{Cy}]\text{NAl}[\text{CH}_3]_3$ , 26.35  ${}_3[(\text{CH}_3)_2\text{Cy}]\text{NAl}[\text{CH}_3]_3$ , -5.05  ${}_3[(\text{Cy})_2\text{CH}_3]\text{NAl}[\text{CH}_3]_3$ .

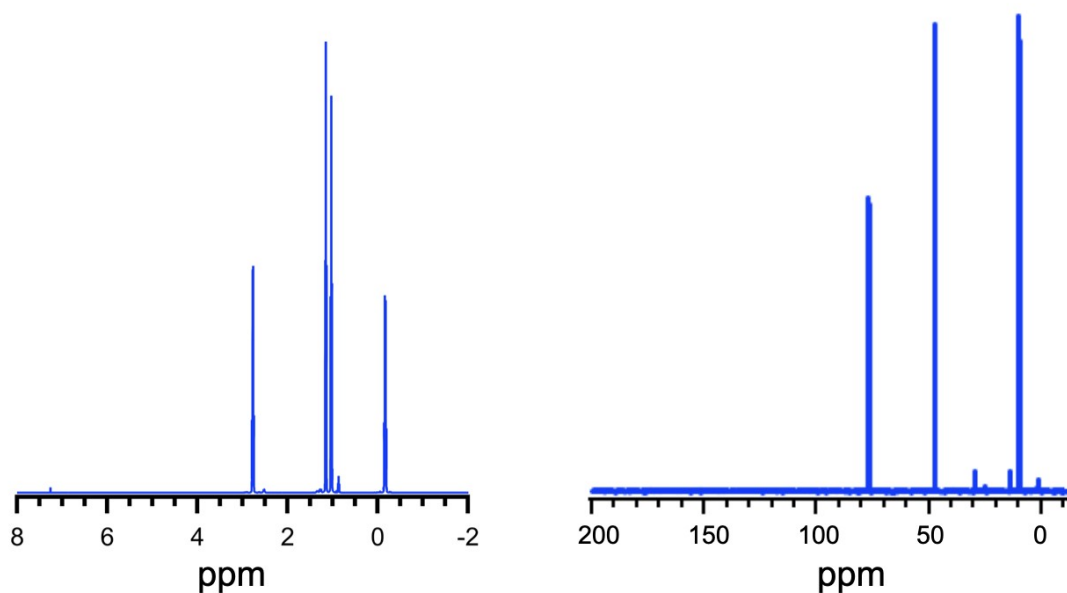

**Figure S 5**  ${}^1\text{H}$  NMR and  ${}^{13}\text{C}$  NMR for  $\text{Et}_3\text{NAlEt}_3$ :  ${}^1\text{H}$  NMR (500 MHz,  $\text{cdCl}_3$ )  $\delta$  2.77 (q,  $J = 7.3$  Hz, 6H)  ${}_3[\text{CH}_3\text{CH}_2]\text{NAl}[\text{CH}_2\text{CH}_3]_3$ , 1.15 (t,  $J = 7.3$  Hz, 9H)  ${}_3[\text{CH}_3\text{CH}_2]\text{NAl}[\text{CH}_2\text{CH}_3]_3$ , 1.03 (t,  $J = 8.1$  Hz, 9H)  ${}_3[\text{CH}_3\text{CH}_2]\text{NAl}[\text{CH}_2\text{CH}_3]_3$ , -0.17 (q,  $J = 8.1$  Hz, 6H)  ${}_3[\text{CH}_3\text{CH}_2]\text{NAl}[\text{CH}_2\text{CH}_3]_3$ .  ${}^{13}\text{C}$  NMR (126 MHz,  $\text{cdCl}_3$ )  $\delta$  47.48  ${}_3[\text{CH}_3\text{CH}_2]\text{NAl}[\text{CH}_2\text{CH}_3]_3$ , 29.45  $[\text{CH}_3\text{CH}_2]\text{NAl}[\text{CH}_2\text{CH}_3]_3$ , 14.01  $[\text{CH}_3\text{CH}_2]\text{NAl}[\text{CH}_2\text{CH}_3]_3$ , 9.25  $[\text{CH}_3\text{CH}_2]\text{NAl}[\text{CH}_2\text{CH}_3]_3$ .

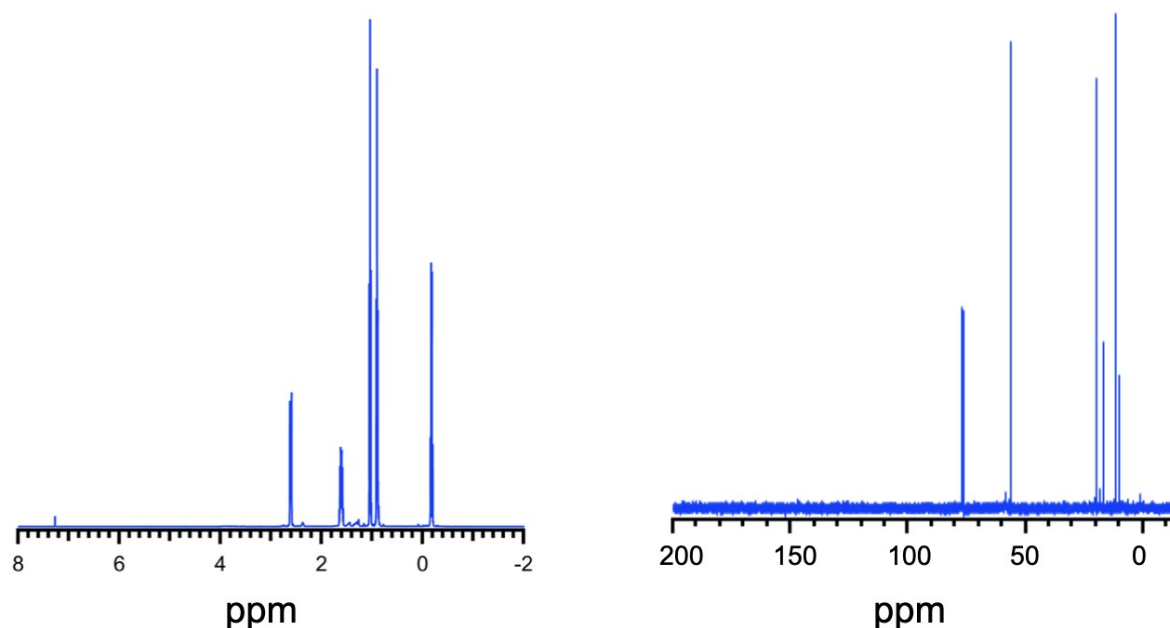

**Figure S 6**  $^1\text{H}$  NMR and  $^{13}\text{C}$  NMR for  $\text{Pr}_3\text{NAIEt}_3$ :  $^1\text{H}$  NMR (500 MHz,  $\text{cdCl}_3$ )  $\delta$  2.64 – 2.57 (m, 6H)  $_3[\text{CH}_3\text{CH}_2\text{CH}_2]\text{NAl}[\text{CH}_2\text{CH}_3]_3$ , 1.66 – 1.55 (m, 6H)  $_3[\text{CH}_3\text{CH}_2\text{CH}_2]\text{NAl}[\text{CH}_2\text{CH}_3]_3$ , 1.04 (t,  $J = 8.1$  Hz, 9H)  $_3[\text{CH}_3\text{CH}_2\text{CH}_2]\text{NAl}[\text{CH}_2\text{CH}_3]_3$ , 0.90 (m, 9H)  $_3[\text{CH}_3\text{CH}_2\text{CH}_2]\text{NAl}[\text{CH}_2\text{CH}_3]_3$ , -0.18 (q,  $J = 8.1$  Hz, 6H)  $_3[\text{CH}_3\text{CH}_2\text{CH}_2]\text{NAl}[\text{CH}_2\text{CH}_3]_3$ .  $^{13}\text{C}$  NMR (126 MHz,  $\text{cdCl}_3$ )  $\delta$  56.43  $_3[\text{CH}_3\text{CH}_2\text{CH}_2]\text{NAl}[\text{CH}_2\text{CH}_3]_3$ , 20.25  $_3[\text{CH}_3\text{CH}_2\text{CH}_2]\text{NAl}[\text{CH}_2\text{CH}_3]_3$ , 17.04  $_3[\text{CH}_3\text{CH}_2\text{CH}_2]\text{NAl}[\text{CH}_2\text{CH}_3]_3$ , 11.93  $_3[\text{CH}_3\text{CH}_2\text{CH}_2]\text{NAl}[\text{CH}_2\text{CH}_3]_3$ , 10.24  $\text{CH}_3\text{CH}_2\text{CH}_2\text{NAlCH}_2\text{CH}_3$ .

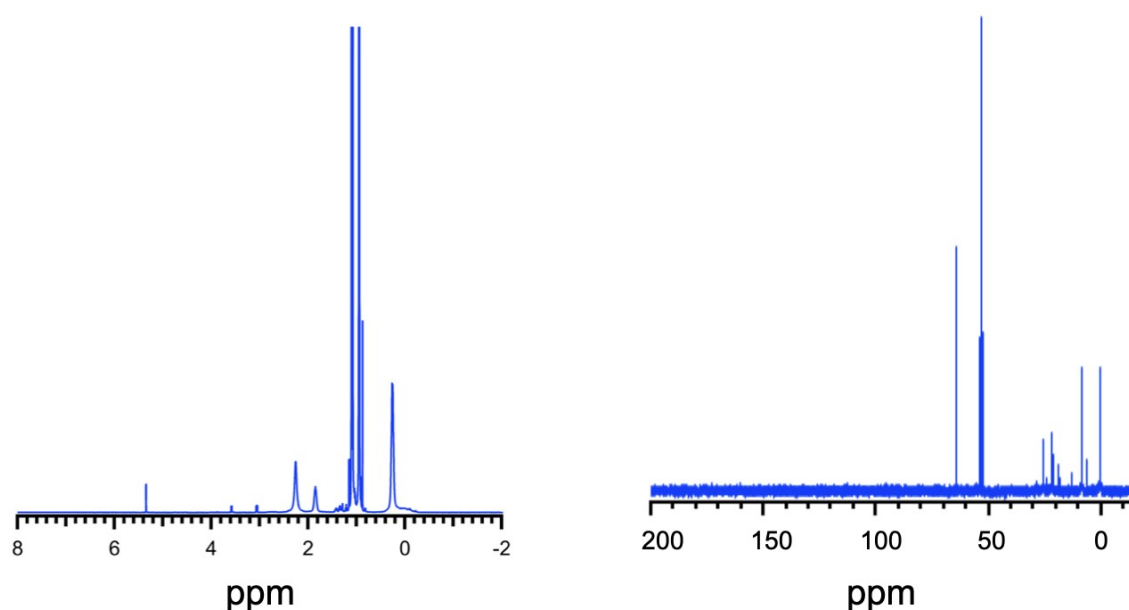

**Figure S 7**  $^1\text{H}$  NMR and  $^{13}\text{C}$  NMR for  $\text{iBu}_3\text{NAIEt}_3$ :  $^1\text{H}$  NMR (500 MHz,  $\text{cd}_2\text{Cl}_2$ )  $\delta$  2.25 (b, 6H)  $_3[(\text{CH}_3)_2\text{CHCH}_2]\text{NAl}[\text{CH}_2\text{CH}_3]_3$ , 1.86-1.83 (b, 3H)  $_3[(\text{CH}_3)_2\text{CHCH}_2]\text{NAl}[\text{CH}_2\text{CH}_3]_3$ , 1.09 (t,  $J = 8.0$  Hz, 9H)  $_3[(\text{CH}_3)_2\text{CHCH}_2]\text{NAl}[\text{CH}_2\text{CH}_3]_3$ , 0.94 (d,  $J = 6.6$  Hz, 18H)  $_3[(\text{CH}_3)_2\text{CHCH}_2]\text{NAl}[\text{CH}_2\text{CH}_3]_3$ , 0.26 (q,  $J = 8.0$  Hz, 6H)  $_3[(\text{CH}_3)_2\text{CHCH}_2]\text{NAl}[\text{CH}_2\text{CH}_3]_3$ .  $^{13}\text{C}$  NMR (126 MHz,  $\text{cd}_2\text{Cl}_2$ )  $\delta$  64.38  $_3[(\text{CH}_3)_2\text{CHCH}_2]\text{NAl}[\text{CH}_2\text{CH}_3]_3$ , 25.77  $_3[(\text{CH}_3)_2\text{CHCH}_2]\text{NAl}[\text{CH}_2\text{CH}_3]_3$ , 19.21  $_3[(\text{CH}_3)_2\text{CHCH}_2]\text{NAl}[\text{CH}_2\text{CH}_3]_3$ , 13.51  $_3[(\text{CH}_3)_2\text{CHCH}_2]\text{NAl}[\text{CH}_2\text{CH}_3]_3$ , 8.64  $_3[(\text{CH}_3)_2\text{CHCH}_2]\text{NAl}[\text{CH}_2\text{CH}_3]_3$ , 0.52  $_3[(\text{CH}_3)_2\text{CHCH}_2]\text{NAl}[\text{CH}_2\text{CH}_3]_3$ .

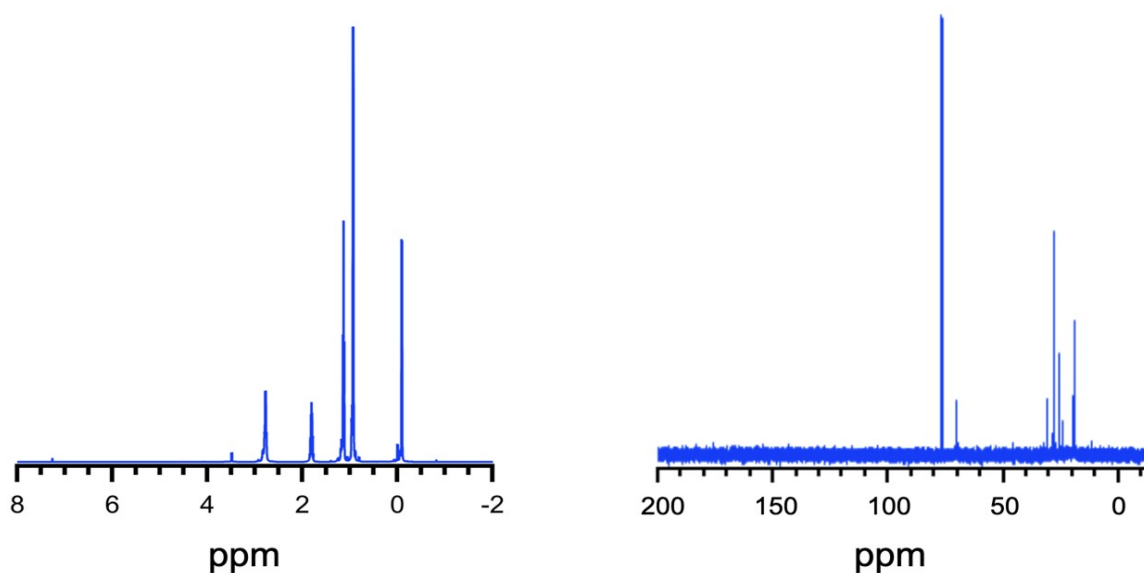

**Figure S 8** <sup>1</sup>H NMR and <sup>13</sup>C NMR for Et<sub>3</sub>NAlBu<sub>3</sub>: <sup>1</sup>H NMR (500 MHz, CDCl<sub>3</sub>) δ 2.80 (q, *J* = 7.3 Hz, 6H) <sub>3</sub>[CH<sub>3</sub>CH<sub>2</sub>]NAl[CH<sub>2</sub>CH(CH<sub>3</sub>)<sub>2</sub>]<sub>3</sub>, 1.80 (dq, *J* = 6.6, 6.8 Hz, 3H) <sub>3</sub>[CH<sub>3</sub>CH<sub>2</sub>]NAl[CH<sub>2</sub>CH(CH<sub>3</sub>)<sub>2</sub>]<sub>3</sub>, 1.13 (t, *J* = 7.3 Hz, 9H) <sub>3</sub>[CH<sub>3</sub>CH<sub>2</sub>]NAl[CH<sub>2</sub>CH(CH<sub>3</sub>)<sub>2</sub>]<sub>3</sub>, 0.93 (b, *J* = 6.5 Hz, 18H) <sub>3</sub>[CH<sub>3</sub>CH<sub>2</sub>]NAl[CH<sub>2</sub>CH(CH<sub>3</sub>)<sub>2</sub>]<sub>3</sub>, -0.09 (d, *J* = 6.8 Hz, 6H) <sub>3</sub>[CH<sub>3</sub>CH<sub>2</sub>]NAl[CH<sub>2</sub>CH(CH<sub>3</sub>)<sub>2</sub>]<sub>3</sub>. <sup>13</sup>C NMR (126 MHz, CDCl<sub>3</sub>) δ 47.90 <sub>3</sub>[CH<sub>3</sub>CH<sub>2</sub>]NAl[CH<sub>2</sub>CH(CH<sub>3</sub>)<sub>2</sub>]<sub>3</sub>, 30.96 <sub>3</sub>[CH<sub>3</sub>CH<sub>2</sub>]NAl[CH<sub>2</sub>CH(CH<sub>3</sub>)<sub>2</sub>]<sub>3</sub>, 28.37 <sub>3</sub>[CH<sub>3</sub>CH<sub>2</sub>]NAl[CH<sub>2</sub>CH(CH<sub>3</sub>)<sub>2</sub>]<sub>3</sub>, 25.51 <sub>3</sub>[CH<sub>3</sub>CH<sub>2</sub>]NAl[CH<sub>2</sub>CH(CH<sub>3</sub>)<sub>2</sub>]<sub>3</sub>, 19.75 <sub>3</sub>[CH<sub>3</sub>CH<sub>2</sub>]NAl[CH<sub>2</sub>CH(CH<sub>3</sub>)<sub>2</sub>]<sub>3</sub>, 19.35 <sub>3</sub>[CH<sub>3</sub>CH<sub>2</sub>]NAl[CH<sub>2</sub>CH(CH<sub>3</sub>)<sub>2</sub>]<sub>3</sub>.

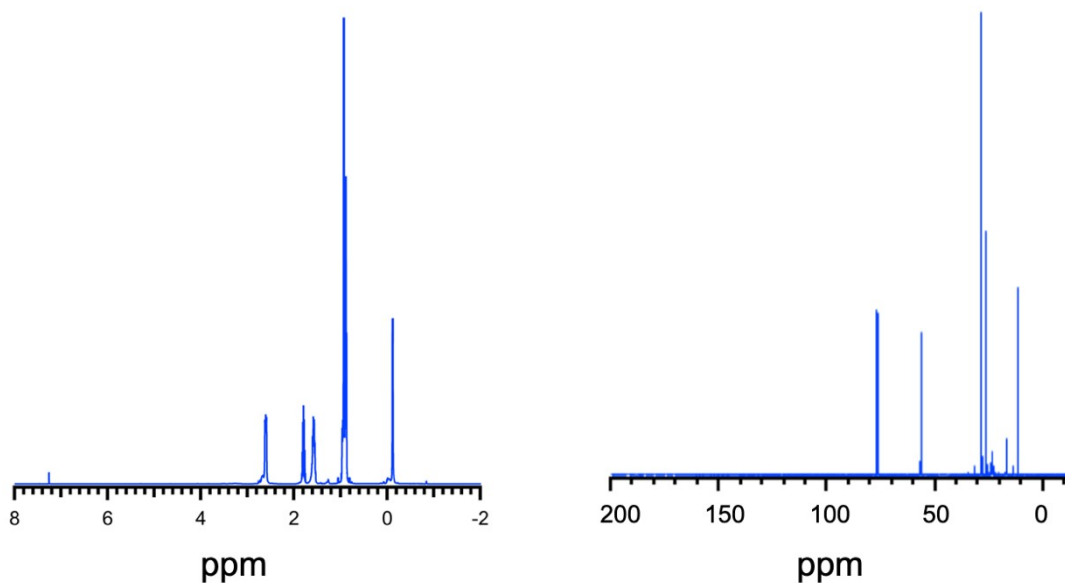

**Figure S 9**  $^1\text{H}$  NMR and  $^{13}\text{C}$  NMR for  $\text{Pr}_3\text{NAl}(\text{iBu})_3$ :  $^1\text{H}$  NMR (500 MHz,  $\text{cdCl}_3$ )  $\delta$  2.64–2.57 (m, 6H)  $^3[\text{CH}_3\text{CH}_2\text{CH}_2]\text{NAl}[\text{CH}_2\text{CH}(\text{CH}_3)_2]_3$ , 1.79 (dh  $J = 13.1, 6.8$  Hz, 3H)  $^3[\text{CH}_3\text{CH}_2\text{CH}_2]\text{NAl}[\text{CH}_2\text{CH}(\text{CH}_3)_2]_3$ , 1.58 (m, 6H)  $^3[\text{CH}_3\text{CH}_2\text{CH}_2]\text{NAl}[\text{CH}_2\text{CH}(\text{CH}_3)_2]_3$ , 0.93–0.91 (d,  $J = 13.1, 18$ Hz)  $^3[\text{CH}_3\text{CH}_2\text{CH}_2]\text{NAl}[\text{CH}_2\text{CH}(\text{CH}_3)_2]_3$ , 0.91–0.84 (d,  $J = 6.9$  Hz, 9H)  $^3[\text{CH}_3\text{CH}_2\text{CH}_2]\text{NAl}[\text{CH}_2\text{CH}(\text{CH}_3)_2]_3$ , -0.12 (d,  $J = 6.8$  Hz, 6H)  $^3[\text{CH}_3\text{CH}_2\text{CH}_2]\text{NAl}[\text{CH}_2\text{CH}(\text{CH}_3)_2]_3$ .  $^{13}\text{C}$  NMR (126 MHz,  $\text{cdCl}_3$ )  $\delta$  56.74  $^3[\text{CH}_3\text{CH}_2\text{CH}_2]\text{NAl}[\text{CH}_2\text{CH}(\text{CH}_3)_2]_3$ , 29.05  $^3[\text{CH}_3\text{CH}_2\text{CH}_2]\text{NAl}[\text{CH}_2\text{CH}(\text{CH}_3)_2]_3$ , 26.61  $^3[\text{CH}_3\text{CH}_2\text{CH}_2]\text{NAl}[\text{CH}_2\text{CH}(\text{CH}_3)_2]_3$ , 24.02  $^3[\text{CH}_3\text{CH}_2\text{CH}_2]\text{NAl}[\text{CH}_2\text{CH}(\text{CH}_3)_2]_3$ , 17.12  $^3[\text{CH}_3\text{CH}_2\text{CH}_2]\text{NAl}[\text{CH}_2\text{CH}(\text{CH}_3)_2]_3$ , 11.76  $^3[\text{CH}_3\text{CH}_2\text{CH}_2]\text{NAl}[\text{CH}_2\text{CH}(\text{CH}_3)_2]_3$ .

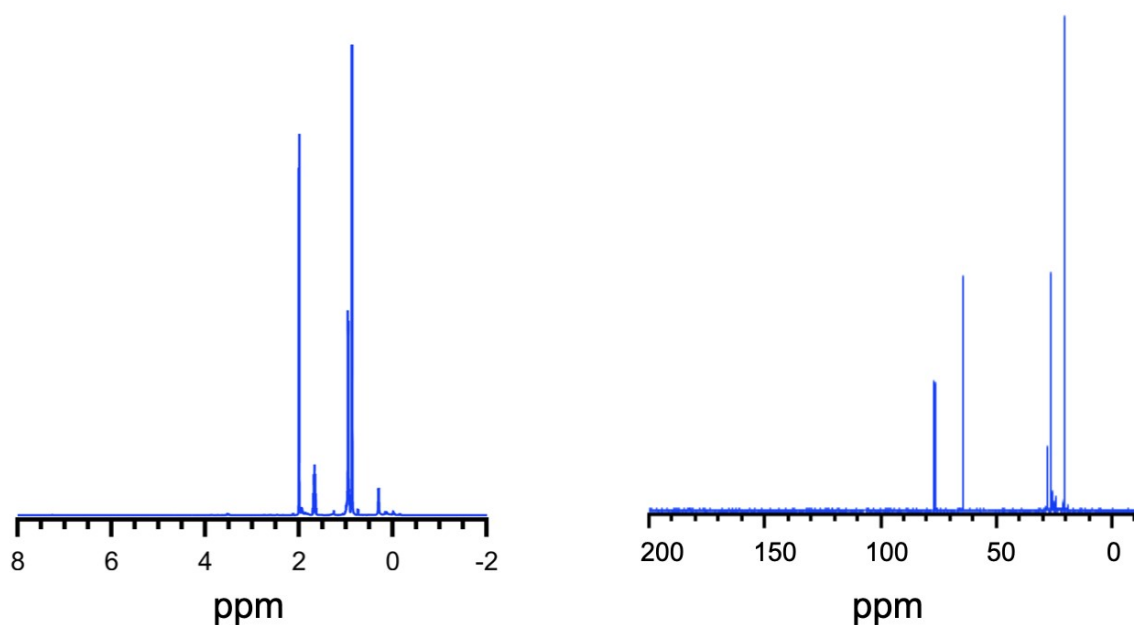

**Figure S 10**  $^1\text{H}$  NMR and  $^{13}\text{C}$  NMR for  $\text{iBu}_3\text{NAl}(\text{iBu})_3$ :  $^1\text{H}$  NMR (500 MHz,  $\text{cdCl}_3$ )  $\delta$  2.00 (d,  $J = 7.1$  Hz, 6H)  $^3[(\text{CH}_3)_2\text{CHCH}_2]\text{NAl}[\text{CH}_2\text{CH}(\text{CH}_3)_2]_3$ , 1.97–1.80 (m, 3H)  $^3[(\text{CH}_3)_2\text{CHCH}_2]\text{NAl}[\text{CH}_2\text{CH}(\text{CH}_3)_2]_3$ , 1.68 (dq,  $J = 13.5, 6.6$  Hz, 3H)  $^3[(\text{CH}_3)_2\text{CHCH}_2]\text{NAl}[\text{CH}_2\text{CH}(\text{CH}_3)_2]_3$ , 1.04 – 0.91 (m, 18H)  $^3[(\text{CH}_3)_2\text{CHCH}_2]\text{NAl}[\text{CH}_2\text{CH}(\text{CH}_3)_2]_3$ , 0.87 (d,  $J = 6.6$  Hz, 18H)  $^3[(\text{CH}_3)_2\text{CHCH}_2]\text{NAl}[\text{CH}_2\text{CH}(\text{CH}_3)_2]_3$ , 0.23 (d,  $J = 7.1$  Hz, 6H)  $^3[(\text{CH}_3)_2\text{CHCH}_2]\text{NAl}[\text{CH}_2\text{CH}(\text{CH}_3)_2]_3$ .  $^{13}\text{C}$  NMR (126 MHz,  $\text{cdCl}_3$ )  $\delta$  64.90  $^3[(\text{CH}_3)_2\text{CHCH}_2]\text{NAl}[\text{CH}_2\text{CH}(\text{CH}_3)_2]_3$ , 28.30  $^3[(\text{CH}_3)_2\text{CHCH}_2]\text{NAl}[\text{CH}_2\text{CH}(\text{CH}_3)_2]_3$ , 26.66  $^3[(\text{CH}_3)_2\text{CHCH}_2]\text{NAl}[\text{CH}_2\text{CH}(\text{CH}_3)_2]_3$ , 21.14  $^3[(\text{CH}_3)_2\text{CHCH}_2]\text{NAl}[\text{CH}_2\text{CH}(\text{CH}_3)_2]_3$ , 14.30  $^3[(\text{CH}_3)_2\text{CHCH}_2]\text{NAl}[\text{CH}_2\text{CH}(\text{CH}_3)_2]_3$ .

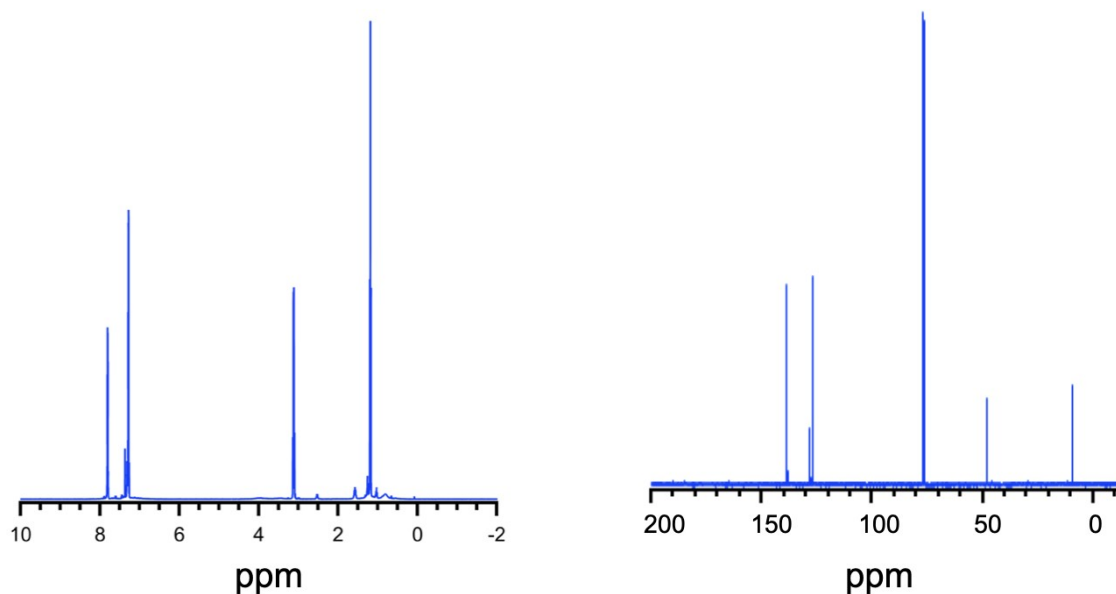

**Figure S 11**  $^1\text{H}$  NMR and  $^{13}\text{C}$  NMR for  $\text{Et}_3\text{AlPh}_3$ :  $^1\text{H}$  NMR (500 MHz,  $\text{cdCl}_3$ )  $\delta$  6.25 – 6.20 (m, 6H) and 5.64 – 5.41 (m, 9H), 5.64 – 5.41 (m, 9H)  ${}_3[\text{CH}_3\text{CH}_2]\text{NAl}[\text{Ph}]_3$ , 0.70 (q,  $J = 7.3$  Hz, 6H)  ${}_3[\text{CH}_3\text{CH}_2]\text{NAl}[\text{Ph}]_3$ , -1.22 (t,  $J = 7.3$  Hz, 9H)  ${}_3[\text{CH}_3\text{CH}_2]\text{NAl}[\text{Ph}]_3$ .  $^{13}\text{C}$  NMR (126 MHz,  $\text{cdCl}_3$ )  $\delta$  138.98, 128.33, 127.59, 127.31, 127.16, 127.06, 127.03  ${}_3[\text{CH}_3\text{CH}_2]\text{NAl}[\text{Ph}]_3$ , 47.90  ${}_3[\text{CH}_3\text{CH}_2]\text{NAl}[\text{Ph}]_3$ .

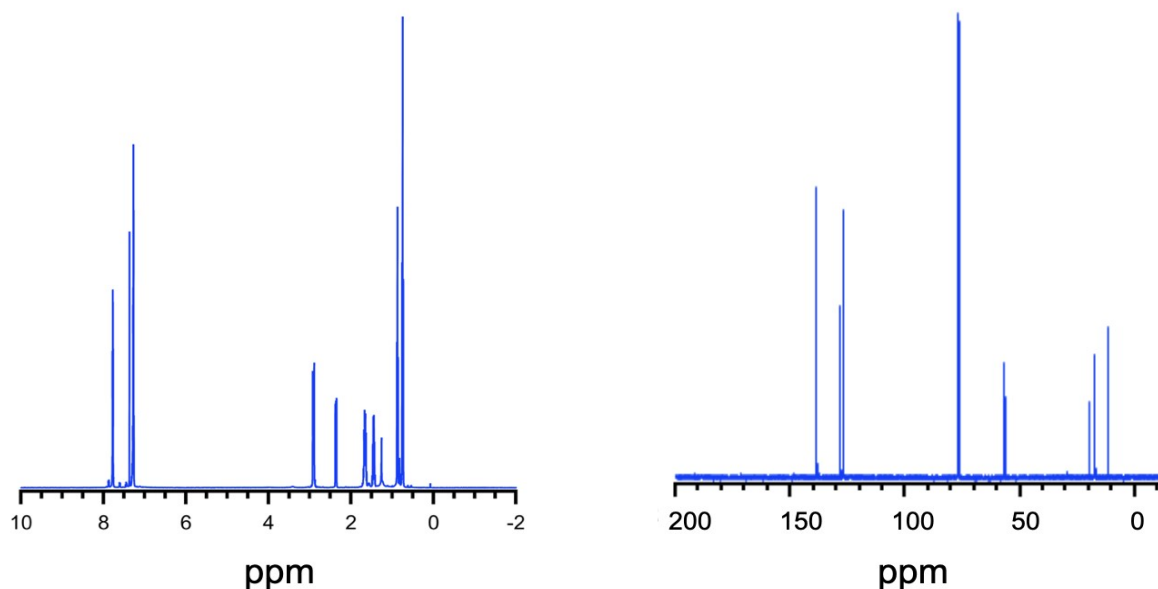

**Figure S 12**  $^1\text{H}$  NMR and  $^{13}\text{C}$  NMR for  $\text{Pr}_3\text{AlPh}_3$ :  $^1\text{H}$  NMR (500 MHz,  $\text{cdCl}_3$ )  $\delta$  7.89 – 7.11 (m, 15H)  ${}_3[\text{CH}_3\text{CH}_2\text{CH}_2]\text{NAl}[\text{Ph}]_3$ , 2.94 – 2.85 (m, 4H) and 2.44 – 2.31 (m, 2H)  ${}_3[\text{CH}_3\text{CH}_2\text{CH}_2]\text{NAl}[\text{Ph}]_3$ , 1.73 – 1.60 (m, 4H), 1.50 – 1.39 (m, 2H)  ${}_3[\text{CH}_3\text{CH}_2\text{CH}_2]\text{NAl}[\text{Ph}]_3$ , 0.95 – 0.80 (m, 3H) and 0.75 (t,  $J = 7.2$  Hz, 6H)  ${}_3[\text{CH}_3\text{CH}_2\text{CH}_2]\text{NAl}[\text{Ph}]_3$ .  $^{13}\text{C}$  NMR (126 MHz,  $\text{cdCl}_3$ )  $\delta$  138.93, 138.29, 137.94, 128.33, 127.59, 127.31, 127.16, 127.06, 127.03  ${}_3[\text{CH}_3\text{CH}_2\text{CH}_2]\text{NAl}[\text{Ph}]_3$ , 47.90  ${}_3[\text{CH}_3\text{CH}_2\text{CH}_2]\text{NAl}[\text{Ph}]_3$ , 11.67  ${}_3[\text{CH}_3\text{CH}_2\text{CH}_2]\text{NAl}[\text{Ph}]_3$ , 9.30  ${}_3[\text{CH}_3\text{CH}_2\text{CH}_2]\text{NAl}[\text{Ph}]_3$ .



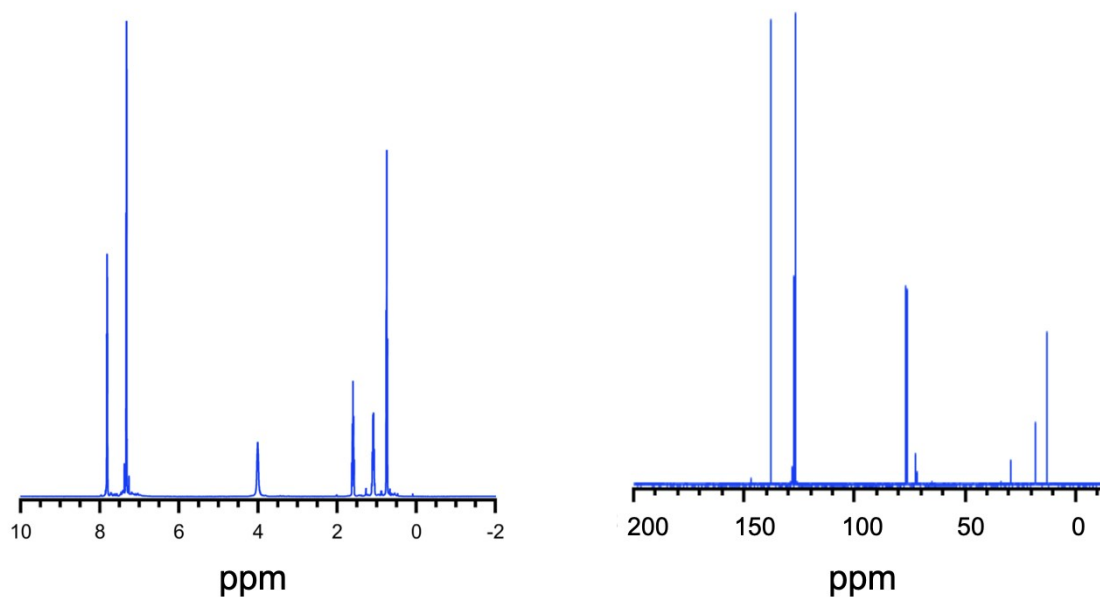

**Figure S 13**  $^1\text{H}$  NMR and  $^{13}\text{C}$  NMR for  $i\text{Bu}_3\text{NAlPh}_3$ :  $^1\text{H}$  NMR (500 MHz,  $\text{cdCl}_3$ )  $\delta$  7.84 – 7.80 (m, 6H) and 7.38 – 7.29 (m, 9H)  $_3[(\text{CH}_3)_2\text{CHCH}_2]\text{NAl}[\text{Ph}]_3$ , 4.01 (d,  $J = 10.5$  Hz, 3H)  $_3[(\text{CH}_3)_2\text{CHCH}_2]\text{NAl}[\text{Ph}]_3$ , 1.75 – 1.41 (m, 6H)  $_3[(\text{CH}_3)_2\text{CHCH}_2]\text{NAl}[\text{Ph}]_3$ , 1.10-0.56 (m, 18H).  $^{13}\text{C}$  NMR (126 MHz,  $\text{cdCl}_3$ )  $\delta$  138.29, 127.61, 127.46, 127.36, 127.17, 126.93  $_3[(\text{CH}_3)_2\text{CHCH}_2]\text{NAl}[\text{Ph}]_3$ , 72.41  $_3[(\text{CH}_3)_2\text{CHCH}_2]\text{NAl}[\text{Ph}]_3$ , 29.76  $_3[(\text{CH}_3)_2\text{CHCH}_2]\text{NAl}[\text{Ph}]_3$ , 18.15  $_3[(\text{CH}_3)_2\text{CHCH}_2]\text{NAl}[\text{Ph}]_3$ .

### Kinetic Data

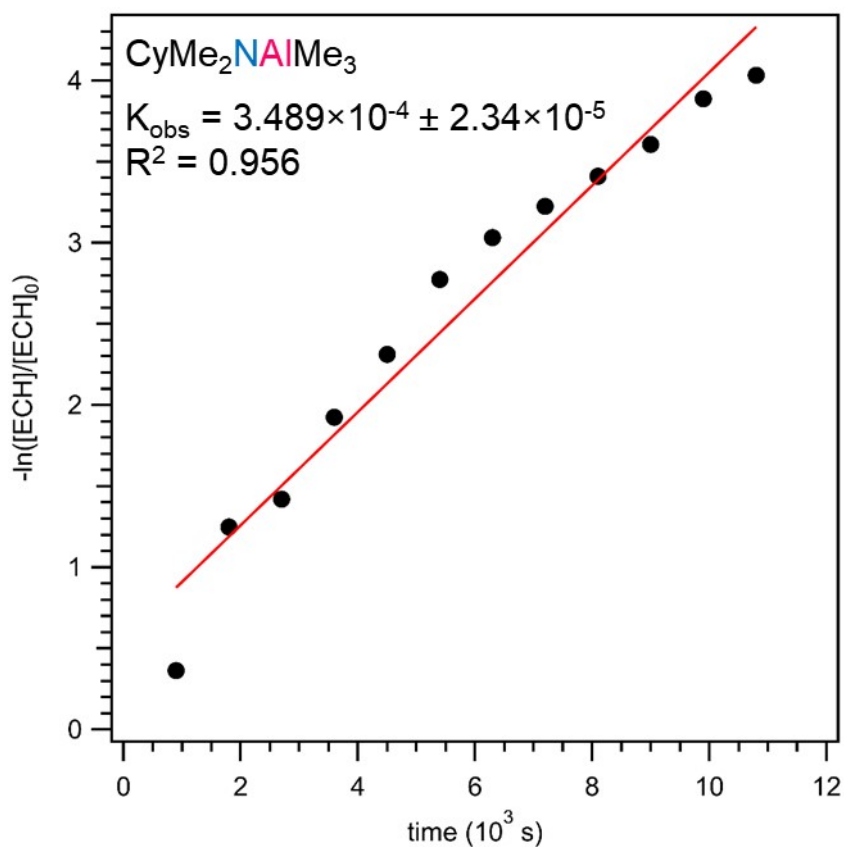

**Figure S 14.** Plot of  $-\ln([ECH]/[ECH]_0)$  as a function of time for catalyst CyMe<sub>2</sub>NAIME<sub>3</sub>. The reaction was monitored for three hours with <sup>1</sup>H NMR spectroscopy and conversion was determined from integration of the resonances associated with the monomer peaks compared to the total integral of the monomer and polymer. The slope of a linear fit to the data is the observed rate constant ( $k_{\text{obs}}$ ). For this catalyst,  $k_{\text{obs}}$  was determined to be  $3.489 \times 10^{-4} \pm 2.34 \times 10^{-5}$  with an  $R^2$  of 0.956 indicating a good fit to the data.

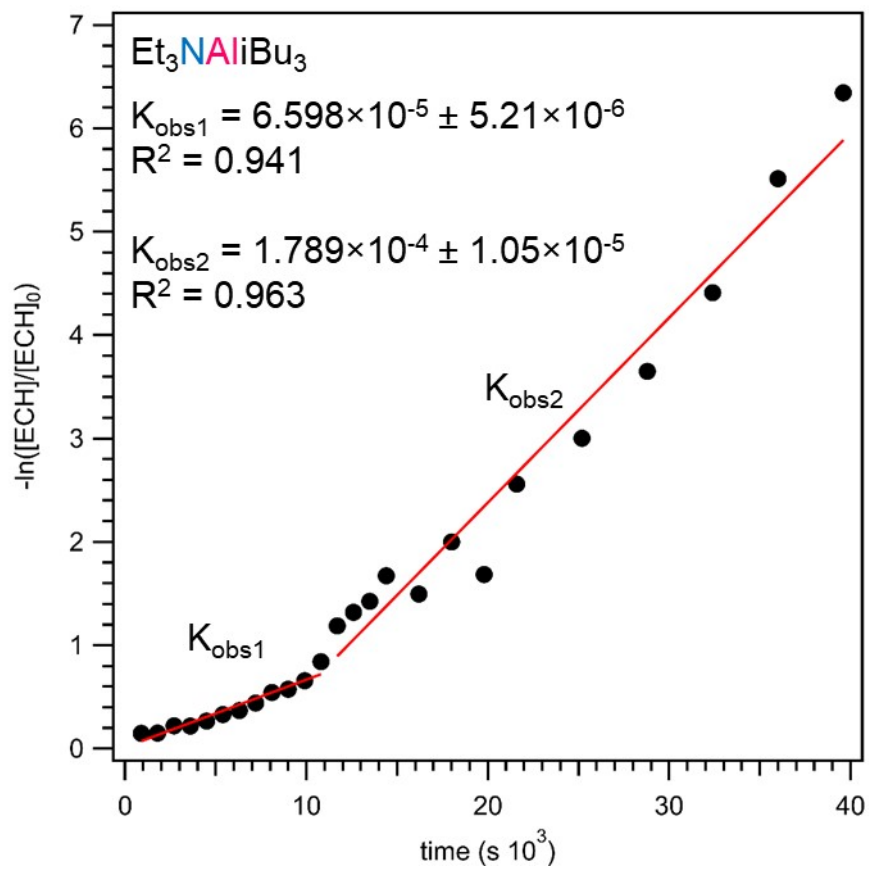

Figure S 15. Kinetic data for Et<sub>3</sub>NAlBu<sub>3</sub>.

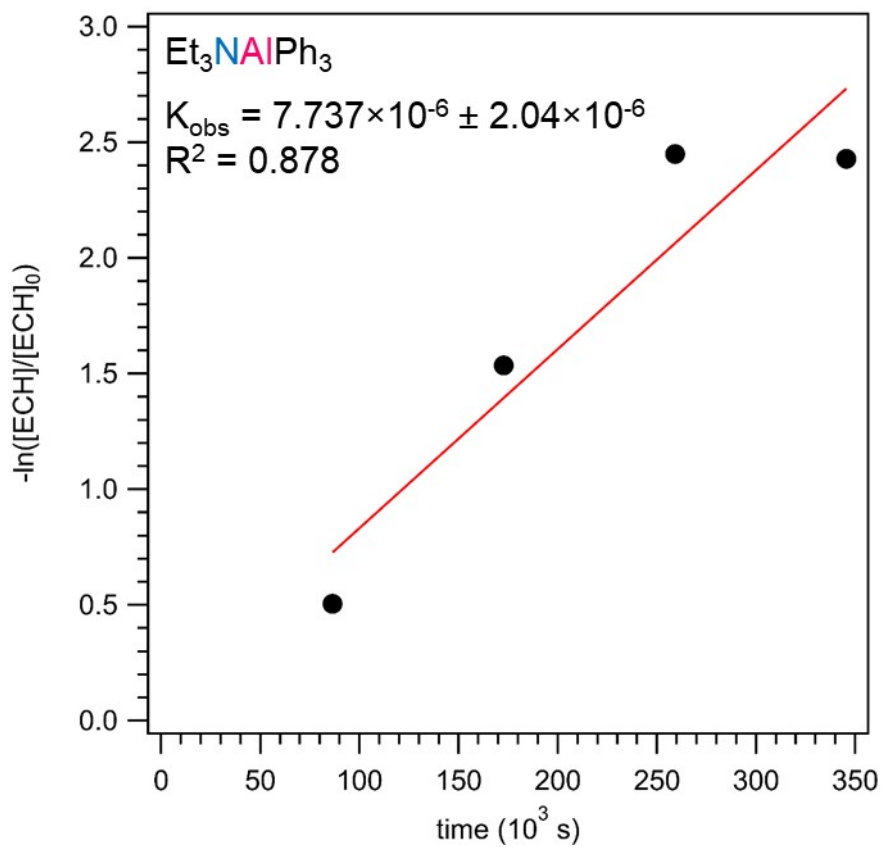

**Figure S 16.** Kinetic data for Et<sub>3</sub>NAlPh<sub>3</sub>

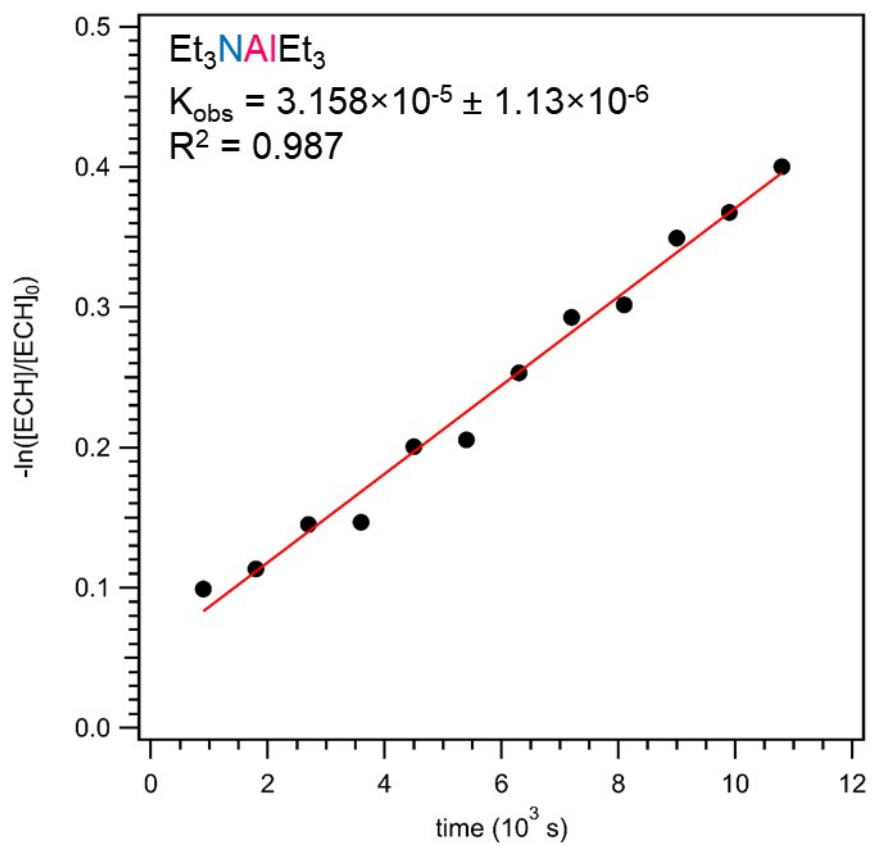

Figure S 17. Kinetic data for Et<sub>3</sub>NAI Et<sub>3</sub>.

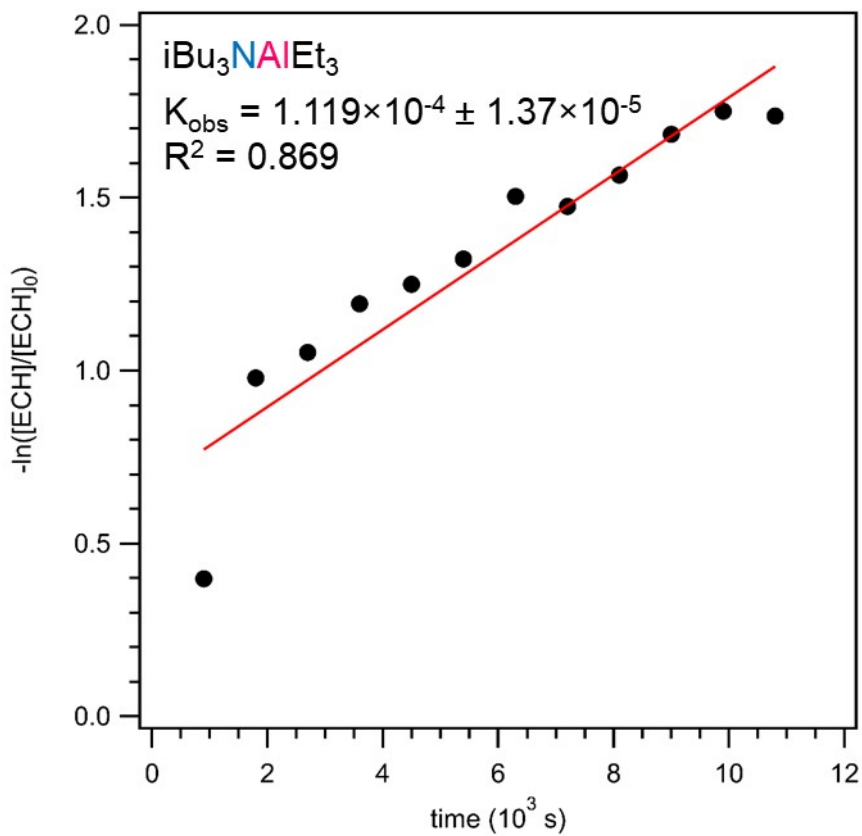

**Figure S 18.** Kinetic data for  $i\text{Bu}_3\text{NAIEt}_3$

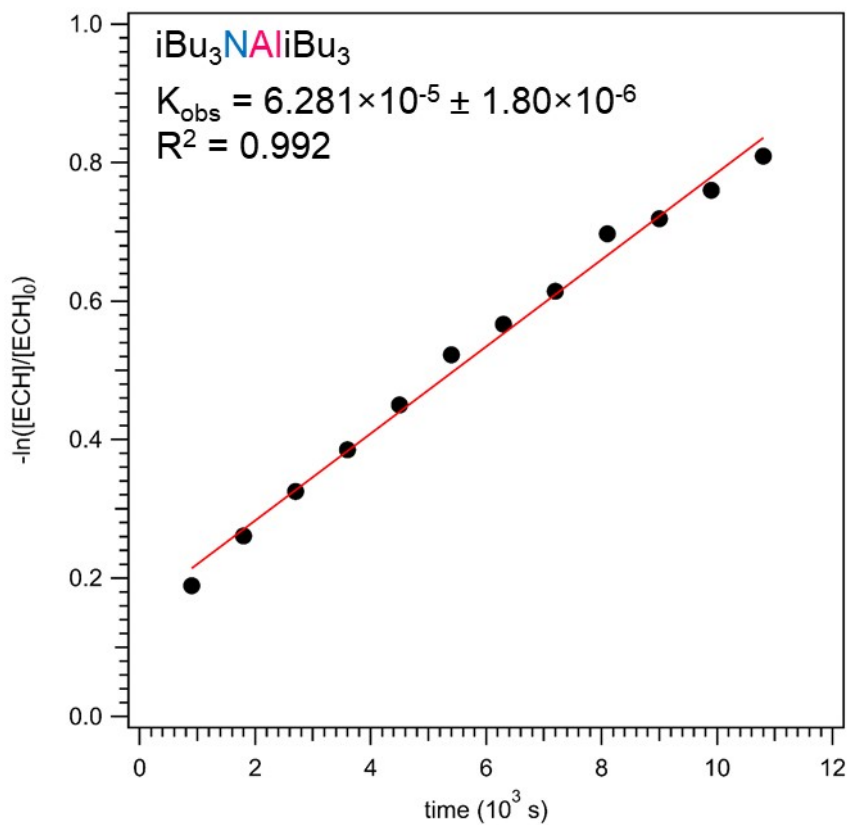

**Figure S 19.** Kinetic data for  $i\text{Bu}_3\text{NALiBu}_3$

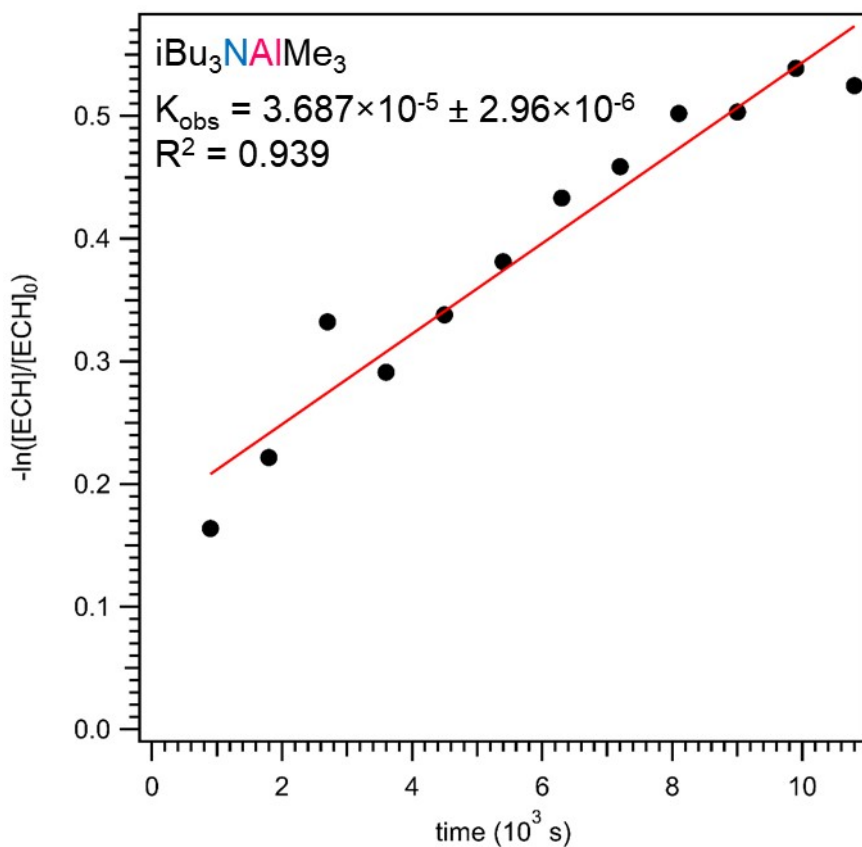

Figure S 20. Kinetic data for  $i\text{Bu}_3\text{NAlMe}_3$ .

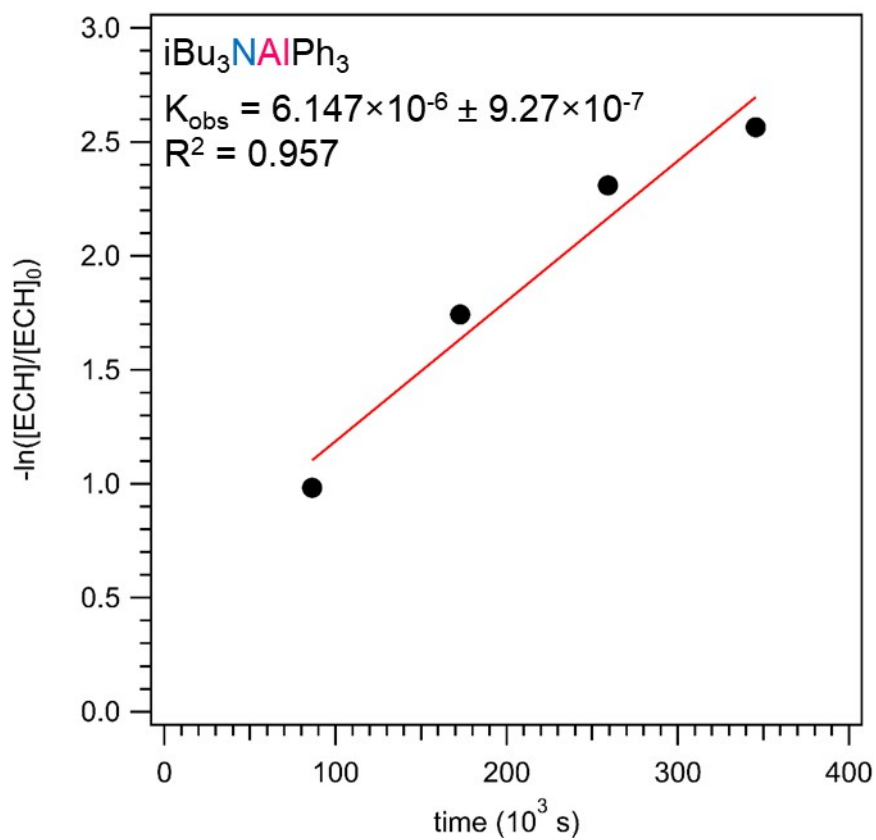

Figure S 21. Kinetic data for  $i\text{Bu}_3\text{NAlPh}_3$

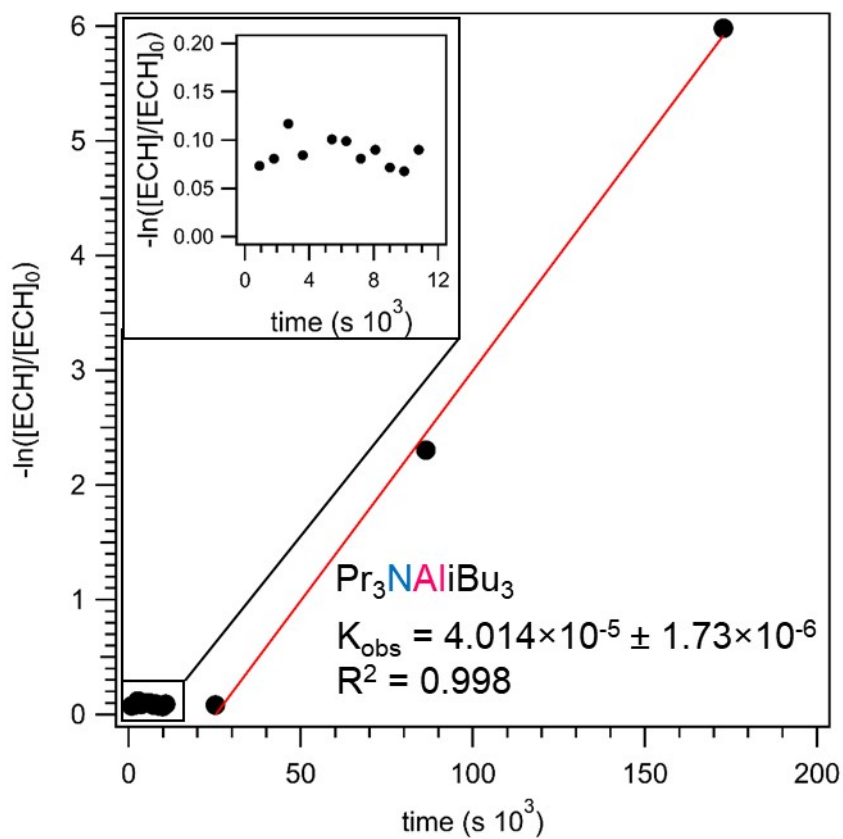

Figure S 22. Kinetic data for  $\text{Pr}_3\text{NAlIBu}_3$

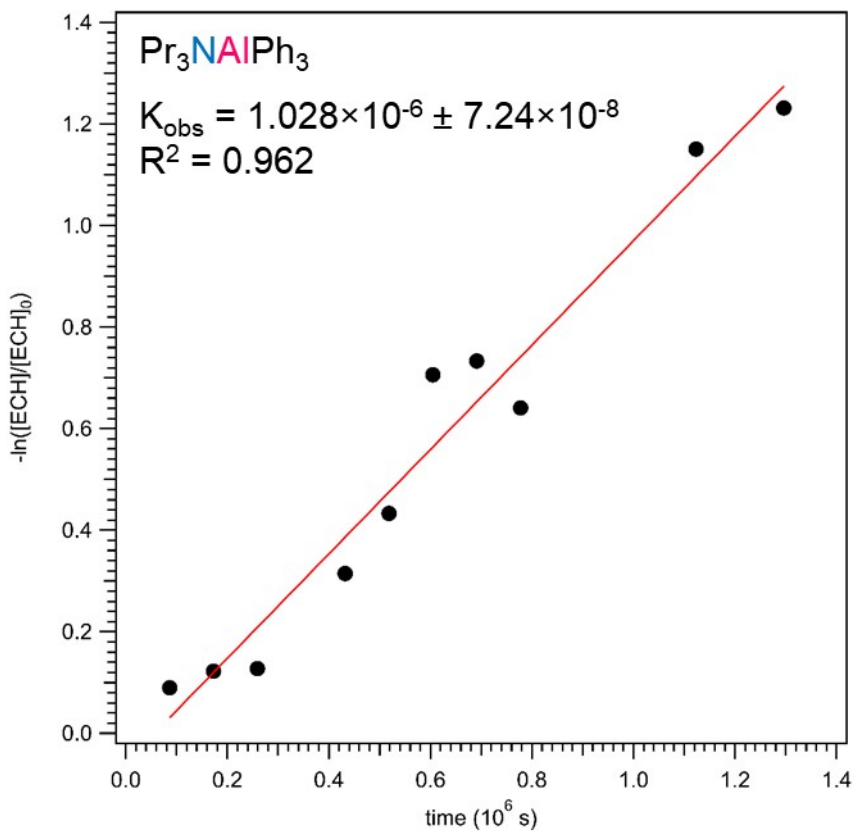

Figure S 23. Kinetic data for  $\text{Pr}_3\text{NAlPh}_3$



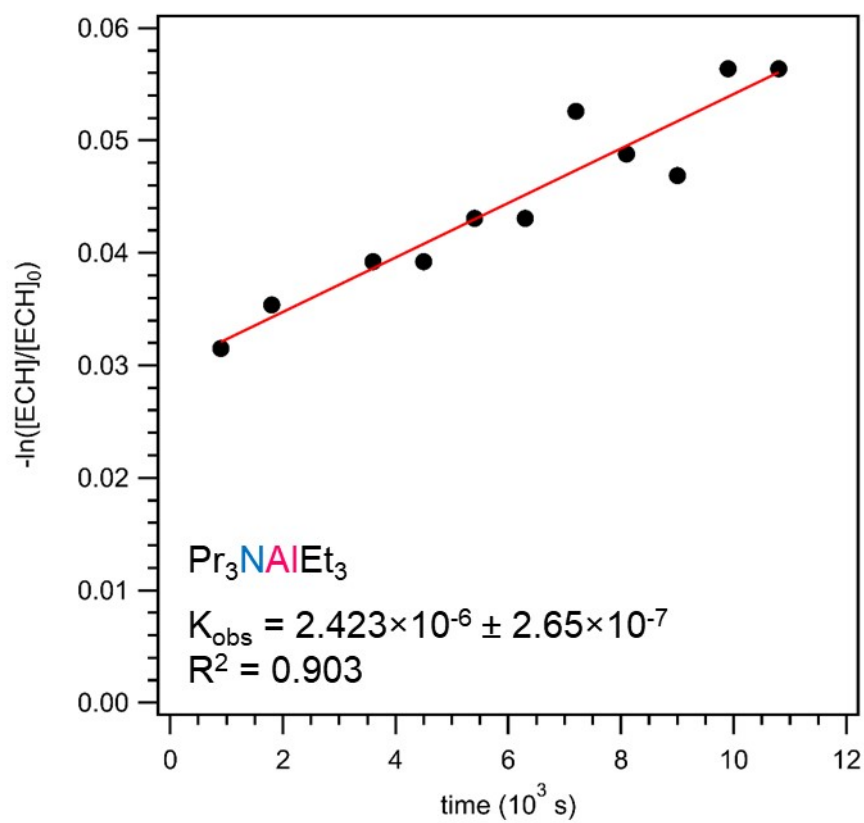

**Figure S 24.** Kinetic data for  $\text{Pr}_3\text{NAIEt}_3$

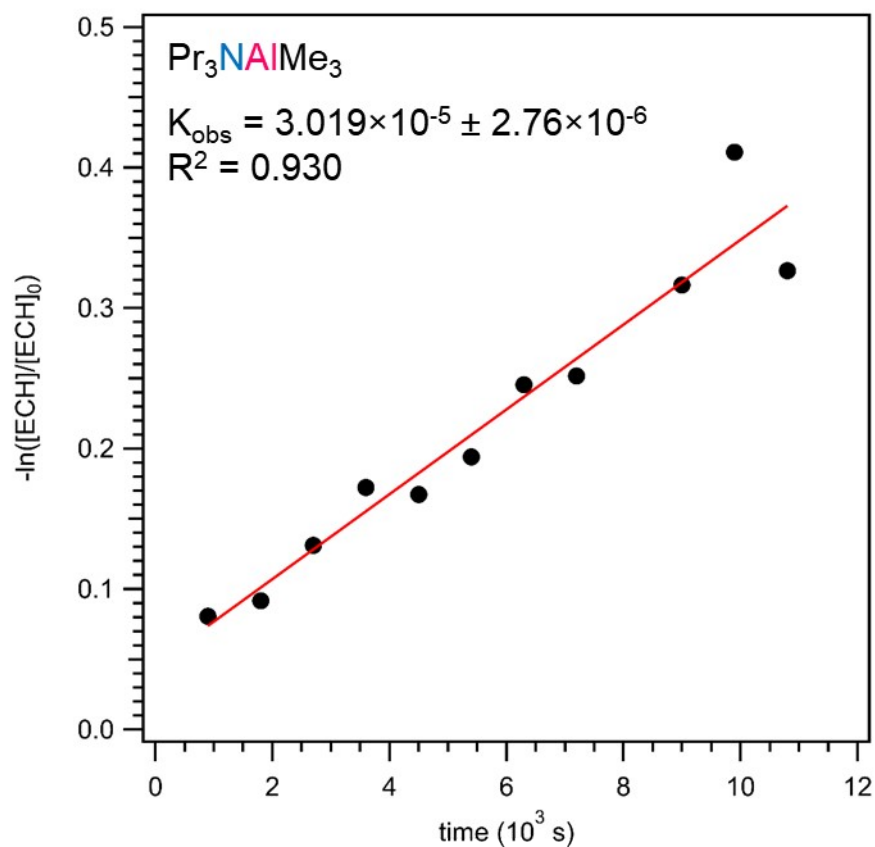

**Figure S 25.** Kinetic data for Pr<sub>3</sub>NAlMe<sub>3</sub>.

**Size exclusion chromatography data.**

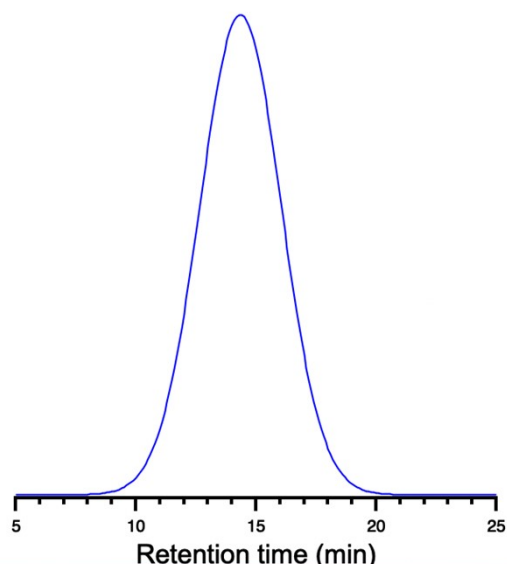

**Figure S 26** SEC trace of targeted 30k BnSPECH. the  $M_n$  is determined to be 30.1 kg/mol with  $\mathcal{D}$  of 3.30 using Pr<sub>3</sub>NAlMe<sub>3</sub>

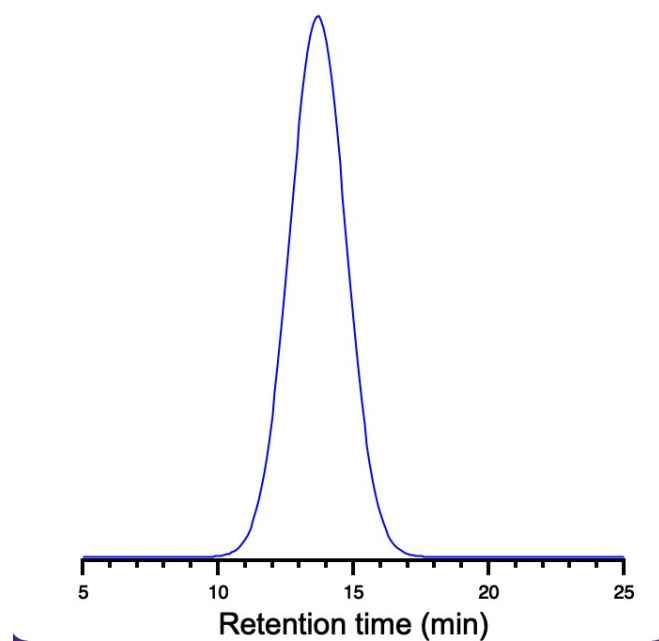

**Figure S 27** SEC trace of targeted 30k BnSPECH. the  $M_n$  is determined to be 36.6 kg/mol with  $\mathcal{D}$  of 1.51 using  $\text{Pr}_3\text{NAlMe}_3$

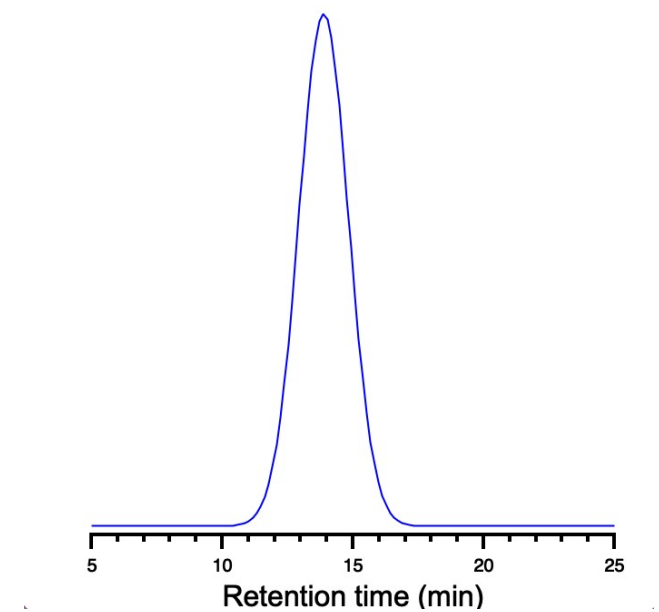

**Figure S 28** SEC trace of targeted 30k BnSPECH. the  $M_n$  is determined to be 32.9 kg/mol with  $\mathcal{D}$  of 2.52 using  $\text{CyMe}_2\text{NAlMe}_3$

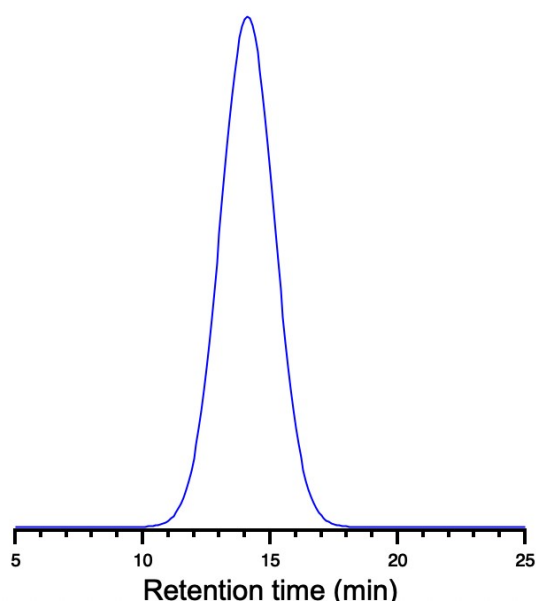

**Figure S 29** SEC trace of targeted 30k BnSPECH. the  $M_n$  is determined to be 27.8 kg/mol with  $\mathcal{D}$  of 1.21 using  $\text{Et}_3\text{NAIEt}_3$

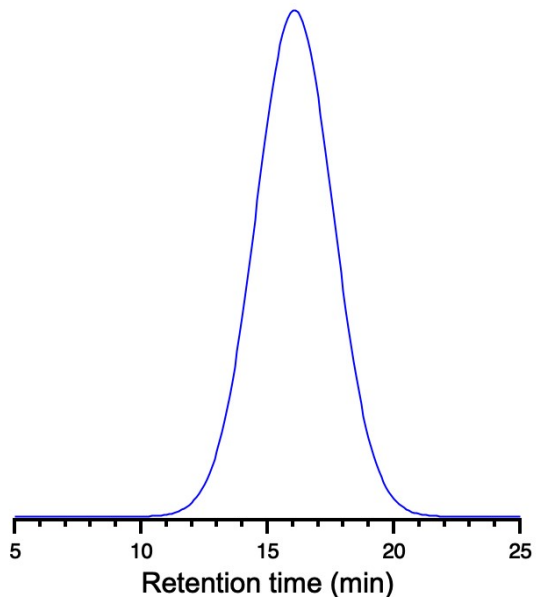

**Figure S 30** SEC trace of targeted 30k BnSPECH. the  $M_n$  is determined to be 28.4 kg/mol with  $\mathcal{D}$  of 2.78 using  $(\text{Pr})_3\text{NAI}(\text{Et})_3$

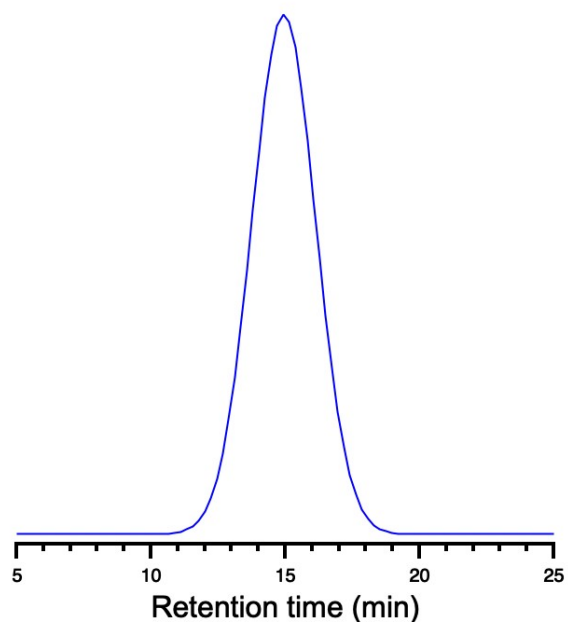

**Figure S 31** SEC trace of targeted 30k BnSPECH. the  $M_n$  is determined to be 35.9 kg/mol with  $\mathcal{D}$  of 2.47 using  $(iBu)_3NAl(Et)_3$

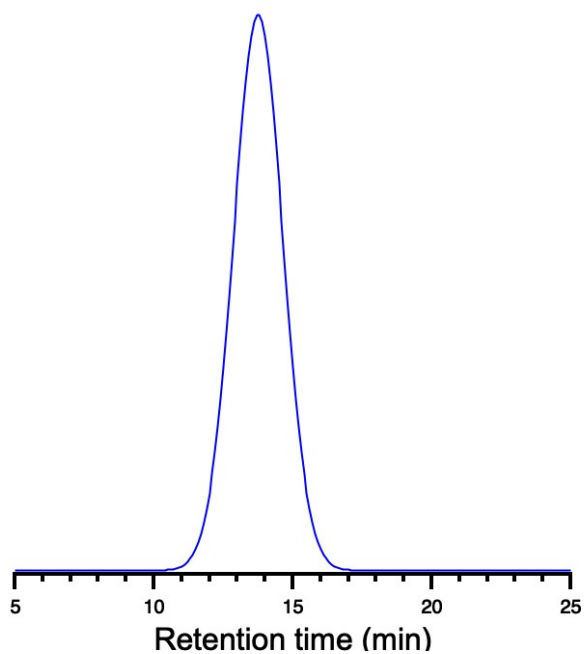

**Figure S 32** SEC trace of targeted 30k BnSPECH. the  $M_n$  is determined to be 36.1 kg/mol with  $\mathcal{D}$  of 2.66 using  $(Et)_3NAl(iBu)_3$

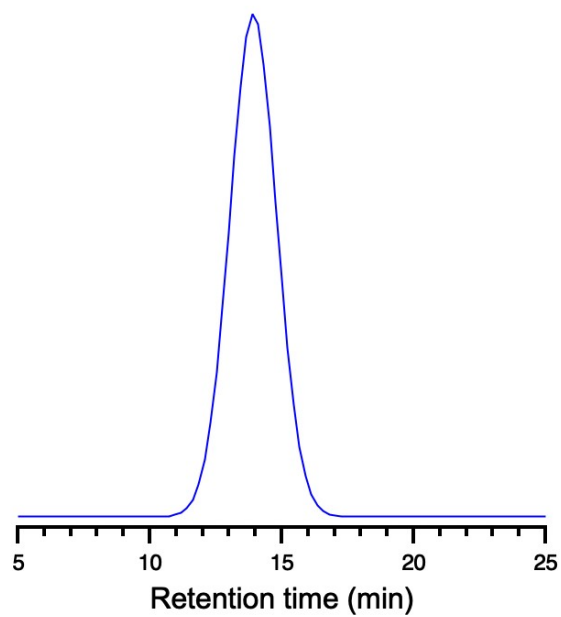

**Figure S 33** SEC trace of targeted 30k BnSPECH. the  $M_n$  is determined to be 33.2 kg/mol with  $\mathcal{D}$  of 1.18 using  $(\text{Pr})_3\text{NAl}(\text{iBu})_3$

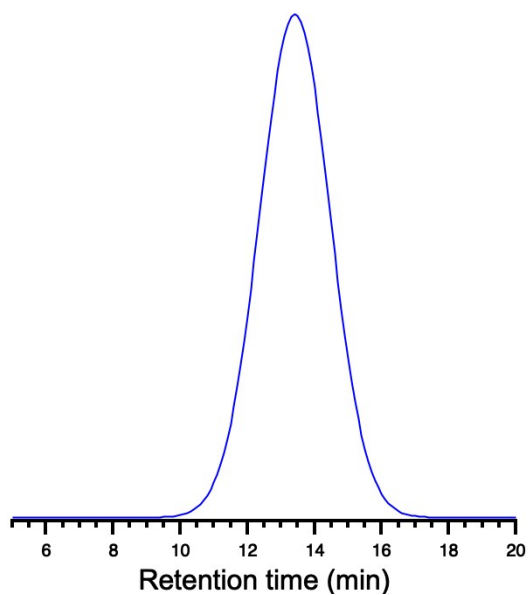

**Figure S 34** SEC trace of targeted 30k BnSPECH. the  $M_n$  is determined to be 27.3 kg/mol with  $\mathcal{D}$  of 1.82 using  $(\text{iBu})_3\text{NAl}(\text{iBu})_3$

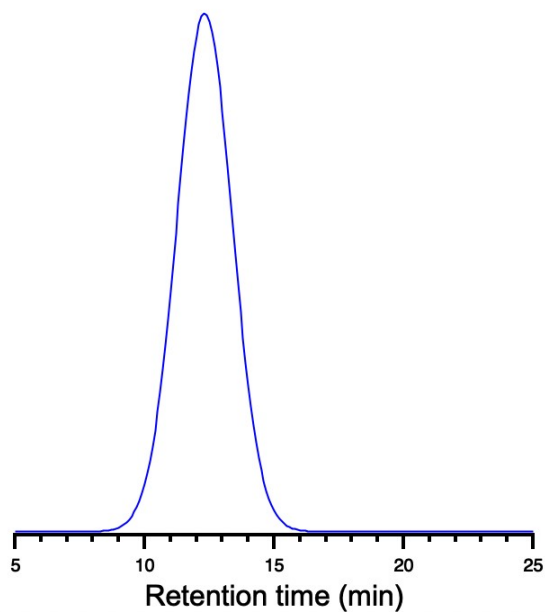

**Figure S 35** SEC trace of targeted 30k BnSPECH. the  $M_n$  is determined to be 37.9 kg/mol with  $\mathcal{D}$  of 1.66 using  $(Et)_3NAl(ph)_3$

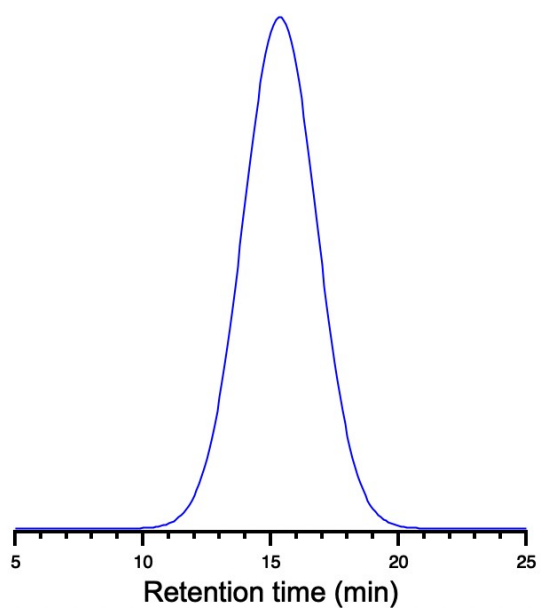

**Figure S 36** SEC trace of targeted 30k BnSPECH. the  $M_n$  is determined to be 26.5 kg/mol with  $\mathcal{D}$  of 1.45 using  $(Pr)_3NAl(ph)_3$

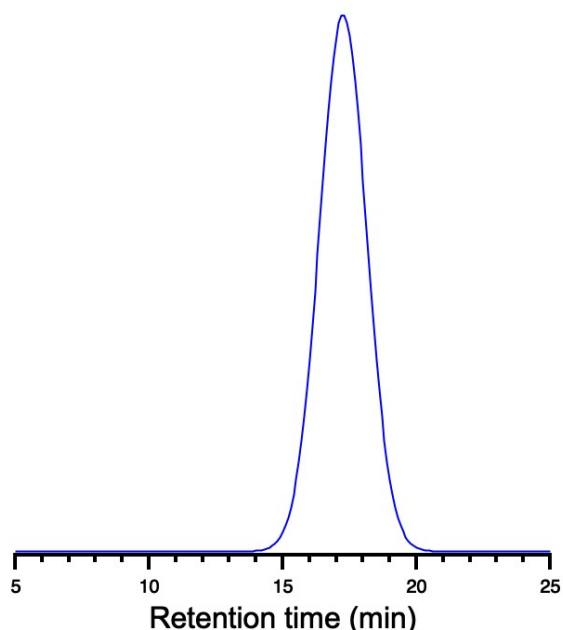

**Figure S 37** SEC trace of targeted 30k BnSPECH. the  $M_n$  is determined to be 22.4 kg/mol with  $\mathcal{D}$  of 1.09 using  $(iBu)_3NAl(Ph)_3$

## Crystallography Data

### MeCy<sub>2</sub>NAlMe<sub>3</sub>

Crystal structure from crystal mounted from the cold stage and glove bag.

Crystal Data and Experimental

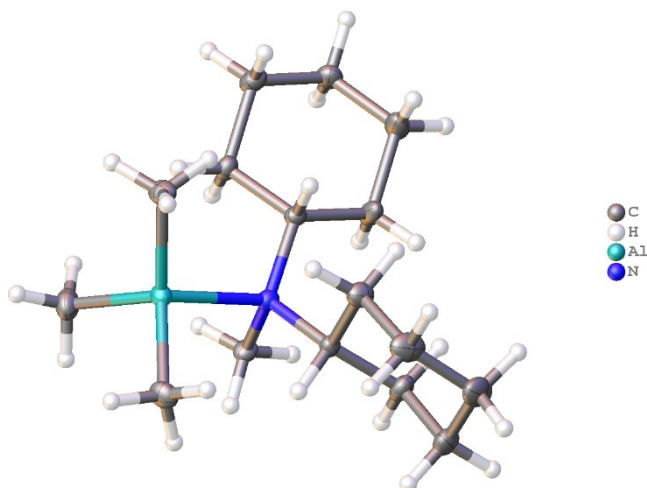

**Experimental.** Single colourless block crystals of MeCy<sub>2</sub>NAlMe<sub>3</sub> used as received. A suitable crystal with dimensions  $0.40 \times 0.28 \times 0.15 \text{ mm}^3$  was selected and solvent frozen at liquid nitrogen on nylon loop on a XtaLAB Synergy, Dualflex, HyPix diffractometer. The crystal was kept at a steady  $T = 100.00(10) \text{ K}$  during data collection. The structure was solved with the **ShelXT** (Sheldrick, 2015) solution program using dual methods and by using **Olex2** (Dolomanov et al., 2009) as the graphical interface. The model was refined with **ShelXL** 2018/3 (Sheldrick, 2015) using full matrix



least squares minimisation on  $F^2$ .

**Crystal Data.**  $C_{16}H_{34}AlN$ ,  $M_r = 267.42$ , orthorhombic,  $P2_12_12_1$  (No. 19),  $a = 7.25651(12)$  Å,  $b = 14.5203(2)$  Å,  $c = 16.1412(2)$  Å,  $\alpha = \beta = \gamma = 90^\circ$ ,  $V = 1700.75(5)$  Å<sup>3</sup>,  $T = 100.00(10)$  K,  $Z = 4$ ,  $Z' = 1$ ,  $\mu(\text{Cu K}\alpha) = 0.906$ , 6653 reflections measured, 3177 unique ( $R_{int} = 0.0565$ ) which were used in all calculations. The final  $wR_2$  was 0.0976 (all data) and  $R_1$  was 0.0375 ( $I > 2(I)$ ).

| Compound                     | RF220c            |
|------------------------------|-------------------|
| CCDC                         | 1986283           |
| Formula                      | $C_{16}H_{34}AlN$ |
| $D_{calc.}/\text{g cm}^{-3}$ | 1.044             |
| $\mu/\text{mm}^{-1}$         | 0.906             |
| Formula Weight               | 267.42            |
| Colour                       | colourless        |
| Shape                        | block             |
| Size/mm <sup>3</sup>         | 0.40×0.28×0.15    |
| $T/\text{K}$                 | 100.00(10)        |
| Crystal System               | orthorhombic      |
| Flack Parameter              | -0.04(2)          |
| Hooft Parameter              | -0.04(2)          |
| Space Group                  | $P2_12_12_1$      |
| $a/\text{Å}$                 | 7.25651(12)       |
| $b/\text{Å}$                 | 14.5203(2)        |
| $c/\text{Å}$                 | 16.1412(2)        |
| $\alpha/^\circ$              | 90                |
| $\beta/^\circ$               | 90                |
| $\gamma/^\circ$              | 90                |
| $V/\text{Å}^3$               | 1700.75(5)        |
| $Z$                          | 4                 |
| $Z'$                         | 1                 |
| Wavelength/Å                 | 1.54184           |
| Radiation type               | Cu $K\alpha$      |
| $\theta_{min}/^\circ$        | 4.095             |
| $\theta_{max}/^\circ$        | 77.052            |
| Measured Refl's.             | 6653              |
| Ind't Refl's                 | 3177              |
| Refl's with $I > 2(I)$       | 3041              |
| $R_{int}$                    | 0.0565            |
| Parameters                   | 168               |
| Restraints                   | 0                 |
| Largest Peak                 | 0.290             |
| Deepest Hole                 | -0.431            |
| GooF                         | 1.030             |
| $wR_2$ (all data)            | 0.0976            |
| $wR_2$                       | 0.0962            |
| $R_1$ (all data)             | 0.0433            |
| $R_1$                        | 0.0375            |

## Structure Quality Indicators

|                     |                 |              |               |                          |               |
|---------------------|-----------------|--------------|---------------|--------------------------|---------------|
| <b>Reflections:</b> | d min (Cu) 0.79 | I/σ 15.8     | Rint 5.65%    | complete 100% (IUCr) 94% |               |
| <b>Refinement:</b>  | Shift -0.001    | Max Peak 0.3 | Min Peak -0.4 | Goof 1.030               | Flack -.04(2) |

A colourless block-shaped crystal with dimensions 0.40×0.28×0.15 mm<sup>3</sup> was solvent frozen at liquid nitrogen on nylon loop. Data were collected using a XtaLAB Synergy, Dualflex, HyPix diffractometer equipped with an Oxford Cryosystems low-temperature device, operating at  $T = 100.00(10)$  K.

Data were measured using  $\omega$  scans of 0.5° per frame for 0.1 s using Cu K $\alpha$  radiation (micro-focus sealed X-ray tube, 50 kV, 1 mA). The total number of runs and images was based on the strategy calculation from the program **CrysAlisPro** (Rigaku, V1.171.40.69a, 2020). The actually achieved resolution was  $\Theta = 77.052$ .

Cell parameters were retrieved using the **CrysAlisPro** (Rigaku, V1.171.40.69a, 2020) software and refined using **CrysAlisPro** (Rigaku, V1.171.40.69a, 2020) on 4459 reflections, 67 % of the observed reflections. Data reduction was performed using the **CrysAlisPro** (Rigaku, V1.171.40.69a, 2020) software which corrects for Lorentz polarization. The final completeness is 100.00 out to 77.052 in  $\Theta$  CrysAlisPro 1.171.40.69a (Rigaku Oxford Diffraction, 2020) Numerical absorption correction based on gaussian integration over a multifaceted crystal model Empirical absorption correction using spherical harmonics, implemented in SCALE3 ABSPACK scaling algorithm.

The structure was solved in the space group  $P2_12_12_1$  (# 19) by using dual methods using the ShelXT (Sheldrick, 2015) structure solution program. The structure was refined by Least Squares using version 2014/6 of **XL** (Sheldrick, 2008) incorporated in **Olex2** (Dolomanov et al., 2009). All non-hydrogen atoms were refined anisotropically. Hydrogen atom positions were calculated geometrically and refined using the riding model, except for the hydrogen atom on the non-carbon atom(s) which were found by difference Fourier methods and refined isotropically when data permits.

**CCDC 1986283 contains the supplementary crystallographic data for this paper. The data can be obtained free of charge from The Cambridge Crystallographic Data Centre via [www.ccdc.cam.ac.uk/structures](http://www.ccdc.cam.ac.uk/structures).**

There is a single molecule in the asymmetric unit, which is represented by the reported sum formula. In other words: Z is 4 and Z' is 1.

The Flack parameter was refined to -0.04(2). Determination of absolute structure using Bayesian statistics on Bijvoet differences using the Olex2 results in -0.04(2). Note: The Flack parameter is used to determine chirality of the crystal studied, the value should be near 0, a value of 1 means that the stereochemistry is wrong and the model should be inverted. A value of 0.5 means that the crystal consists of a racemic mixture of the two enantiomers.

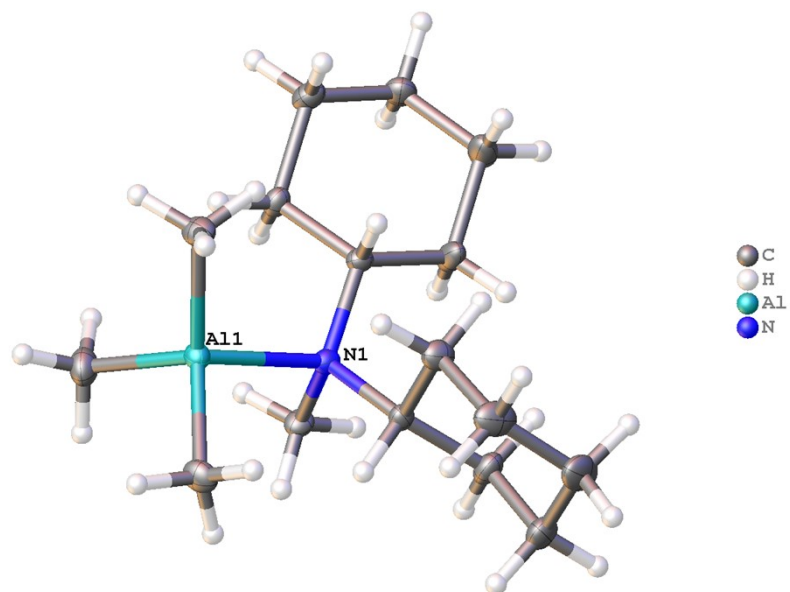

Figure S 38

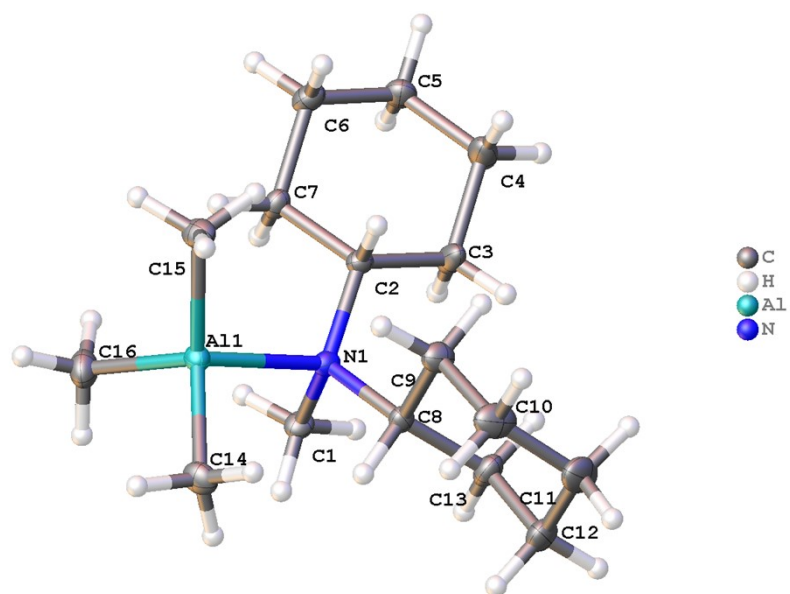

Figure S 39:

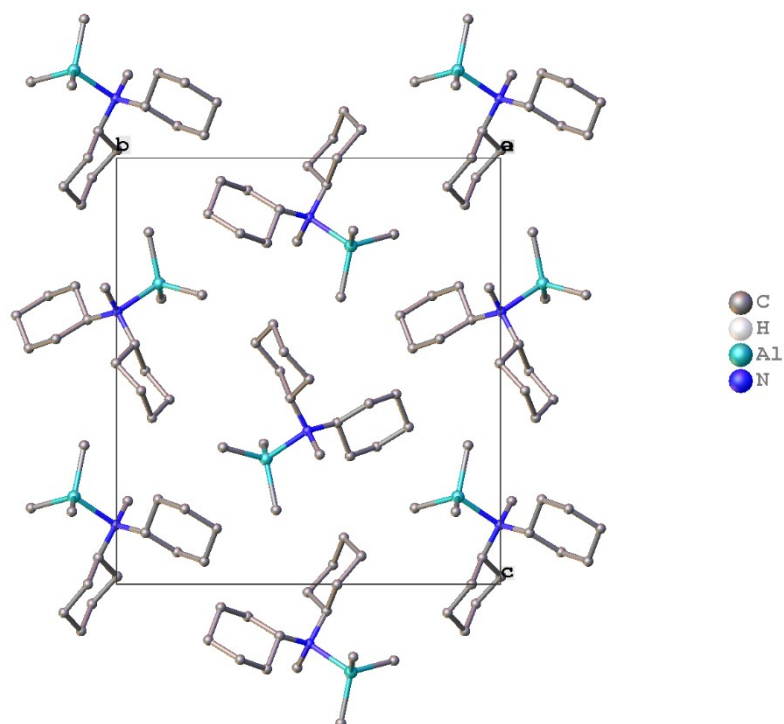

Figure S 40: Packing diagram of MeCy2NAIme3.

Data Plots: Diffraction Data

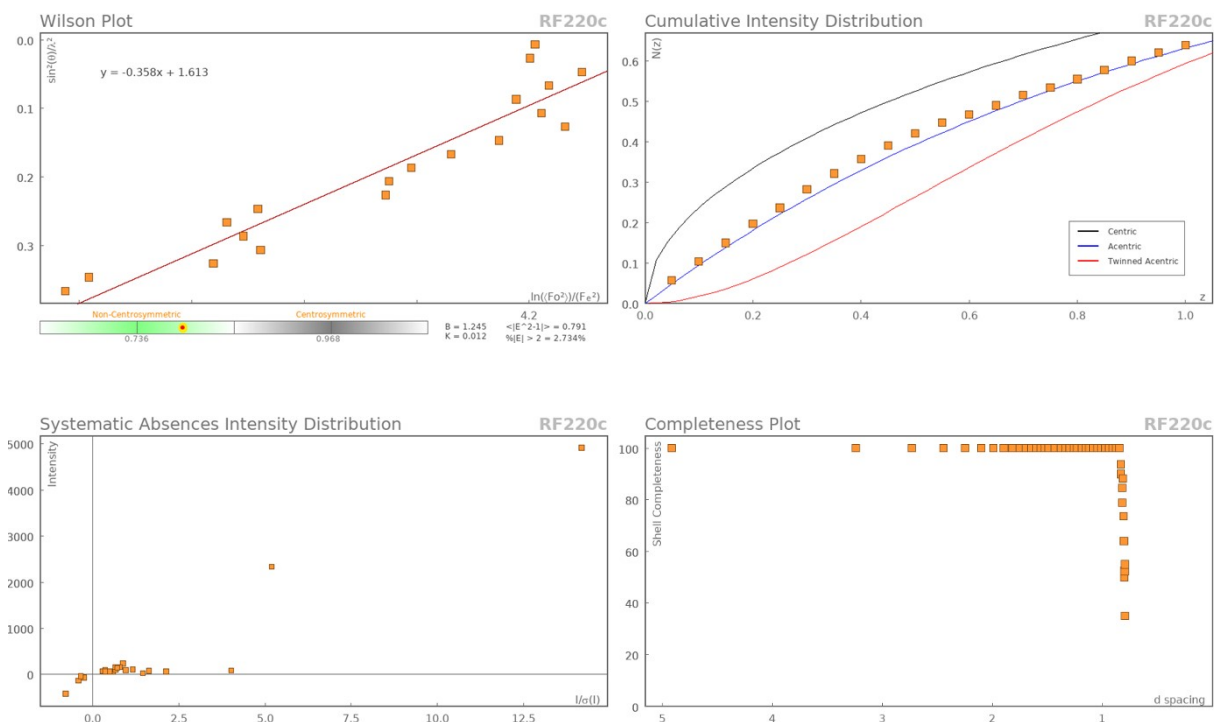

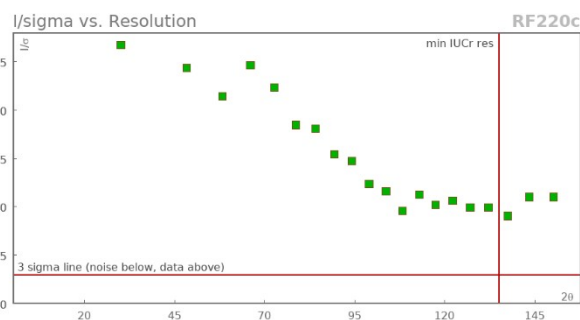

## Data Plots: Refinement and Data

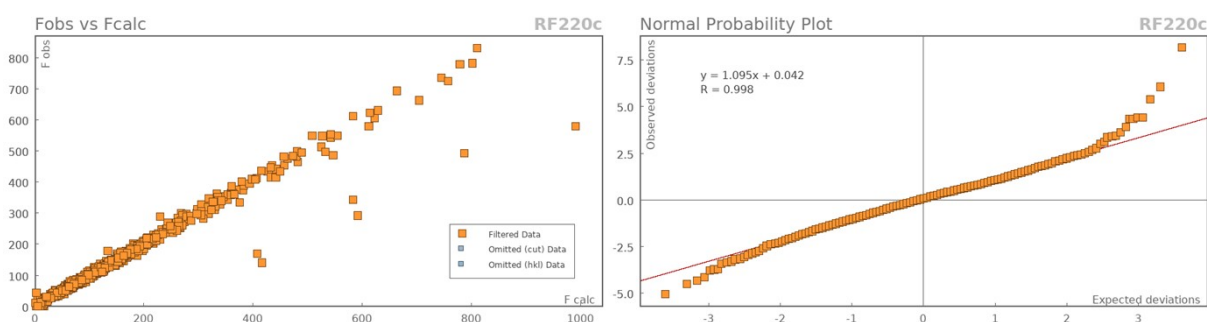

## Reflection Statistics

|                                     |                         |                            |                |
|-------------------------------------|-------------------------|----------------------------|----------------|
| Total reflections (after filtering) | 6679                    | Unique reflections         | 3177           |
| Completeness                        | 0.885                   | Mean $I/\sigma$            | 15.66          |
| $hkl_{\max}$ collected              | (8, 17, 17)             | $hkl_{\min}$ collected     | (-3, -18, -20) |
| $hkl_{\max}$ used                   | (8, 18, 20)             | $hkl_{\min}$ used          | (-8, 0, 0)     |
| Lim $d_{\max}$ collected            | 100.0                   | Lim $d_{\min}$ collected   | 0.77           |
| $d_{\max}$ used                     | 16.14                   | $d_{\min}$ used            | 0.79           |
| Friedel pairs                       | 479                     | Friedel pairs merged       | 0              |
| Inconsistent equivalents            | 9                       | $R_{\text{int}}$           | 0.0565         |
| $R_{\text{sigma}}$                  | 0.0634                  | Intensity transformed      | 0              |
| Omitted reflections                 | 0                       | Omitted by user (OMIT hkl) | 0              |
| Multiplicity                        | (3899, 946, 230, 47, 2) | Maximum multiplicity       | 8              |
| Removed systematic absences         | 26                      | Filtered off (Shel/OMIT)   | 0              |

## Images of the Crystal on the Diffractometer

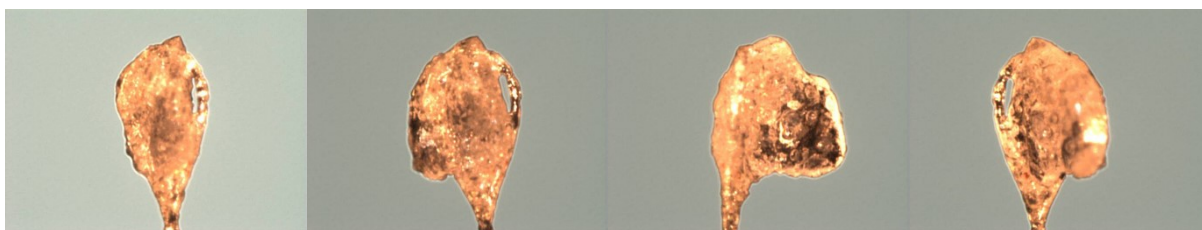

**Table 1:** Fractional Atomic Coordinates ( $\times 10^4$ ) and Equivalent Isotropic Displacement Parameters ( $\text{\AA}^2 \times 10^3$ ) for **MeCy2NAImE3**.  $U_{eq}$  is defined as 1/3 of the trace of the orthogonalised  $U_{ij}$ .

| Atom | x         | y         | z         | $U_{eq}$  |
|------|-----------|-----------|-----------|-----------|
| All  | 3151.1(8) | 6107.2(4) | 7057.3(4) | 15.80(18) |

| Atom | x       | y          | z          | $U_{eq}$ |
|------|---------|------------|------------|----------|
| N1   | 4428(2) | 5021.2(12) | 6396.5(10) | 13.9(4)  |
| C1   | 5944(3) | 4706.6(15) | 6953.4(13) | 16.9(4)  |
| C2   | 3088(3) | 4247.5(14) | 6209.3(12) | 14.8(4)  |
| C3   | 3903(3) | 3418.1(16) | 5756.0(15) | 26.0(5)  |
| C4   | 2410(4) | 2715.8(18) | 5539.1(15) | 28.6(6)  |
| C5   | 1376(3) | 2391.6(16) | 6308.7(14) | 21.8(5)  |
| C6   | 587(3)  | 3220.0(16) | 6767.9(14) | 20.7(5)  |
| C7   | 2088(3) | 3917.0(15) | 6990.7(12) | 17.5(4)  |
| C8   | 5266(3) | 5471.5(14) | 5627.4(13) | 15.3(4)  |
| C9   | 3788(3) | 5746.9(17) | 5005.0(13) | 21.9(5)  |
| C10  | 4599(4) | 6374.7(19) | 4334.4(15) | 30.5(6)  |
| C11  | 6239(4) | 5922(2)    | 3906.3(15) | 33.8(6)  |
| C12  | 7684(3) | 5640.3(19) | 4541.4(14) | 26.4(5)  |
| C13  | 6879(3) | 4985.5(16) | 5187.3(13) | 22.5(5)  |
| C14  | 4603(3) | 7227.0(15) | 6788.4(15) | 22.7(5)  |
| C15  | 529(3)  | 6164.2(16) | 6704.3(14) | 21.3(5)  |
| C16  | 3460(3) | 5841.9(18) | 8257.3(14) | 26.8(5)  |

**Table 2:** Anisotropic Displacement Parameters ( $\times 10^4$ ) for **MeCy2NAIme3**. The anisotropic displacement factor exponent takes the form:  $-2\pi^2[h^2a^{*2} \times U_{11} + \dots + 2hka^* \times b^* \times U_{12}]$

| Atom | $U_{11}$ | $U_{22}$ | $U_{33}$ | $U_{23}$  | $U_{13}$ | $U_{12}$  |
|------|----------|----------|----------|-----------|----------|-----------|
| All  | 14.5(3)  | 17.3(3)  | 15.6(3)  | -2.4(3)   | -0.4(2)  | 0.9(3)    |
| N1   | 13.3(8)  | 15.1(8)  | 13.2(7)  | 2.1(7)    | -0.4(7)  | 0.0(7)    |
| C1   | 13.1(10) | 20.7(10) | 17.0(10) | 1.6(8)    | -1.3(8)  | 1.9(8)    |
| C2   | 13.0(9)  | 16.9(9)  | 14.6(9)  | 0.5(8)    | 0.1(8)   | -2.0(8)   |
| C3   | 24.7(12) | 21.0(12) | 32.2(12) | -12.4(10) | 13.4(10) | -7.8(10)  |
| C4   | 34.3(13) | 25.3(12) | 26.3(11) | -9.6(10)  | 10.0(11) | -13.6(11) |
| C5   | 22.9(11) | 18.7(10) | 23.8(11) | -1.6(9)   | 2.8(9)   | -6.4(9)   |
| C6   | 17.2(11) | 19.5(10) | 25.4(10) | 1.6(9)    | 5.5(9)   | -1.5(9)   |
| C7   | 19.6(10) | 16.3(9)  | 16.6(9)  | 0.6(9)    | 4.8(8)   | -1.3(9)   |
| C8   | 17.0(10) | 15.9(10) | 13.0(9)  | 0.2(8)    | 2.0(8)   | -3.1(8)   |
| C9   | 22.1(11) | 27.1(11) | 16.6(10) | 4.6(9)    | -1.5(8)  | -4.6(9)   |
| C10  | 31.1(13) | 38.1(14) | 22.2(10) | 12.6(10)  | -5.4(10) | -9.2(11)  |
| C11  | 37.1(14) | 47.7(16) | 16.7(11) | 5.2(11)   | 5.0(10)  | -16.6(13) |
| C12  | 25.7(12) | 32.8(13) | 20.7(10) | -0.3(10)  | 8.0(9)   | -7.4(10)  |
| C13  | 22.3(11) | 23.4(11) | 21.8(10) | -0.7(9)   | 8.8(9)   | -2.7(10)  |
| C14  | 24.5(12) | 15.2(10) | 28.2(11) | -3.6(9)   | -2.2(9)  | 0.0(9)    |
| C15  | 15.5(10) | 20.9(11) | 27.4(10) | -3.2(10)  | -0.6(9)  | 2.5(9)    |
| C16  | 27.5(13) | 35.3(13) | 17.6(10) | -4.6(10)  | 0.8(9)   | 2.8(11)   |

**Table 3:** Bond Lengths in Å for **MeCy2NAIme3**.

| Atom | Atom | Length/Å   | Atom | Atom | Length/Å |
|------|------|------------|------|------|----------|
| All  | N1   | 2.1172(18) | C4   | C5   | 1.526(3) |
| All  | C14  | 1.986(2)   | C5   | C6   | 1.524(3) |
| All  | C15  | 1.988(2)   | C6   | C7   | 1.530(3) |
| All  | C16  | 1.988(2)   | C8   | C9   | 1.523(3) |
| N1   | C1   | 1.492(3)   | C8   | C13  | 1.540(3) |
| N1   | C2   | 1.516(3)   | C9   | C10  | 1.533(3) |
| N1   | C8   | 1.529(2)   | C10  | C11  | 1.525(4) |
| C2   | C3   | 1.528(3)   | C11  | C12  | 1.522(4) |
| C2   | C7   | 1.532(3)   | C12  | C13  | 1.527(3) |
| C3   | C4   | 1.528(3)   |      |      |          |

**Table 4:** Bond Angles in  $^\circ$  for **MeCy2NAIme3**.

| Atom | Atom | Atom | Angle/°    | Atom | Atom | Atom | Angle/°    |
|------|------|------|------------|------|------|------|------------|
| C14  | All  | N1   | 105.52(8)  | C3   | C2   | C7   | 109.31(17) |
| C14  | All  | C15  | 114.28(10) | C4   | C3   | C2   | 111.18(19) |
| C14  | All  | C16  | 108.17(11) | C5   | C4   | C3   | 111.6(2)   |
| C15  | All  | N1   | 107.79(8)  | C6   | C5   | C4   | 109.71(19) |
| C16  | All  | N1   | 107.30(9)  | C5   | C6   | C7   | 111.65(18) |
| C16  | All  | C15  | 113.28(10) | C6   | C7   | C2   | 110.56(17) |
| C1   | N1   | All  | 104.30(12) | N1   | C8   | C13  | 118.73(17) |
| C1   | N1   | C2   | 111.46(16) | C9   | C8   | N1   | 111.58(16) |
| C1   | N1   | C8   | 109.07(15) | C9   | C8   | C13  | 110.56(18) |
| C2   | N1   | All  | 111.82(12) | C8   | C9   | C10  | 110.59(19) |
| C2   | N1   | C8   | 114.22(15) | C11  | C10  | C9   | 111.3(2)   |
| C8   | N1   | All  | 105.34(12) | C12  | C11  | C10  | 110.4(2)   |
| N1   | C2   | C3   | 115.55(18) | C11  | C12  | C13  | 111.3(2)   |
| N1   | C2   | C7   | 111.84(16) | C12  | C13  | C8   | 108.68(19) |

**Table 5:** Torsion Angles in ° for MeCy2NAlMe3.

| Atom | Atom | Atom | Atom | Angle/°     |
|------|------|------|------|-------------|
| All  | N1   | C2   | C3   | -178.20(15) |
| All  | N1   | C2   | C7   | -52.30(19)  |
| All  | N1   | C8   | C9   | -72.57(18)  |
| All  | N1   | C8   | C13  | 157.09(16)  |
| N1   | C2   | C3   | C4   | -175.55(18) |
| N1   | C2   | C7   | C6   | 173.23(17)  |
| N1   | C8   | C9   | C10  | 167.86(18)  |
| N1   | C8   | C13  | C12  | -170.21(18) |
| C1   | N1   | C2   | C3   | -61.9(2)    |
| C1   | N1   | C2   | C7   | 64.0(2)     |
| C1   | N1   | C8   | C9   | 175.97(18)  |
| C1   | N1   | C8   | C13  | 45.6(2)     |
| C2   | N1   | C8   | C9   | 50.5(2)     |
| C2   | N1   | C8   | C13  | -79.8(2)    |
| C2   | C3   | C4   | C5   | -57.2(3)    |
| C3   | C2   | C7   | C6   | -57.5(2)    |
| C3   | C4   | C5   | C6   | 55.5(3)     |
| C4   | C5   | C6   | C7   | -56.1(3)    |
| C5   | C6   | C7   | C2   | 58.0(2)     |
| C7   | C2   | C3   | C4   | 57.3(3)     |
| C8   | N1   | C2   | C3   | 62.3(2)     |
| C8   | N1   | C2   | C7   | -171.81(16) |
| C8   | C9   | C10  | C11  | 55.7(3)     |
| C9   | C8   | C13  | C12  | 59.0(2)     |
| C9   | C10  | C11  | C12  | -55.3(3)    |
| C10  | C11  | C12  | C13  | 57.8(3)     |
| C11  | C12  | C13  | C8   | -59.2(3)    |
| C13  | C8   | C9   | C10  | -57.7(2)    |

**Table 6:** Hydrogen Fractional Atomic Coordinates ( $\times 10^4$ ) and Equivalent Isotropic Displacement Parameters ( $\text{\AA}^2 \times 10^3$ ) for **MeCy2NAlMe3**.  $U_{eq}$  is defined as 1/3 of the trace of the orthogonalised  $U_{ij}$ .

| Atom | x       | y       | z       | $U_{eq}$ |
|------|---------|---------|---------|----------|
| H1A  | 6816.16 | 5212.59 | 7040.77 | 25       |
| H1B  | 6585.16 | 4184.84 | 6698.1  | 25       |
| H1C  | 5425.67 | 4515.76 | 7487.18 | 25       |
| H2   | 2123.85 | 4511.7  | 5836.04 | 18       |
| H3A  | 4515.66 | 3628.54 | 5241.66 | 31       |
| H3B  | 4844.91 | 3122.13 | 6110.9  | 31       |
| H4A  | 1527.38 | 2996.85 | 5145.86 | 34       |
| H4B  | 2984.43 | 2178.82 | 5262.98 | 34       |
| H5A  | 364.47  | 1971.59 | 6144.96 | 26       |
| H5B  | 2224.64 | 2049.46 | 6677.1  | 26       |
| H6A  | -28.32  | 3007.68 | 7280.97 | 25       |
| H6B  | -351.75 | 3523.24 | 6416.11 | 25       |
| H7A  | 2984.3  | 3628.31 | 7373.13 | 21       |
| H7B  | 1526.07 | 4450.5  | 7277.18 | 21       |
| H8   | 5791.89 | 6067.14 | 5829.49 | 18       |
| H9A  | 2778.68 | 6072.73 | 5295.27 | 26       |
| H9B  | 3266.84 | 5187.61 | 4744.09 | 26       |
| H10A | 3637.92 | 6515.82 | 3918.2  | 37       |
| H10B | 4997.96 | 6962.18 | 4588.84 | 37       |
| H11A | 5817.74 | 5371.34 | 3597.66 | 41       |
| H11B | 6788.81 | 6357.57 | 3504.73 | 41       |
| H12A | 8165.63 | 6196.99 | 4821.45 | 32       |
| H12B | 8724.86 | 5335.13 | 4255.35 | 32       |
| H13A | 7837.75 | 4815.33 | 5595.87 | 27       |
| H13B | 6436.77 | 4415.77 | 4915.26 | 27       |
| H14A | 5916.57 | 7102.08 | 6874.82 | 34       |
| H14B | 4216.17 | 7734.21 | 7149.15 | 34       |
| H14C | 4394.2  | 7397.46 | 6208.5  | 34       |
| H15A | 305.86  | 6742.94 | 6408.43 | 32       |
| H15B | -269.76 | 6133.97 | 7193.24 | 32       |
| H15C | 257.42  | 5643.9  | 6337.4  | 32       |
| H16A | 3049.38 | 5212.08 | 8373.67 | 40       |
| H16B | 2720.98 | 6277.21 | 8581.27 | 40       |
| H16C | 4761.49 | 5905.68 | 8408.71 | 40       |

### Citations

CrysAlisPro Software System, Rigaku Oxford Diffraction, 2020.

O.V. Dolomanov and L.J. Bourhis and R.J. Gildea and J.A.K. Howard and H. Puschmann, *J. Appl. Cryst.*, 2009, **42**, 339-341.

G.M. Sheldrick, *Acta Cryst.*, 2008, **A64**, 339-341.



## Pr2NAlMe3

Crystal structure of crystals grown and mount on cold stage in glove bag.

Crystal Data and Experimental

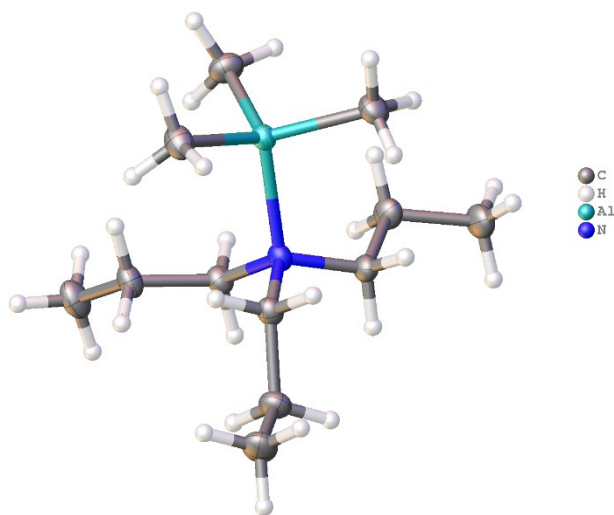

**Experimental.** Single colourless block crystals of **Pr2NAlMe3** used as received. A suitable crystal with dimensions  $0.16 \times 0.12 \times 0.12 \text{ mm}^3$  was selected and mounted on a nylon loop with paratone oil on a XtaLAB Synergy, Dualflex, HyPix diffractometer. The crystal was kept at a steady  $T = 100.01(10) \text{ K}$  during data collection. The structure was solved with the **ShelXT** 2018/2 (Sheldrick, 2018) solution program using dual methods and by using **Olex2** (Dolomanov et al., 2009) as the graphical interface. The model was refined with **XL** (Sheldrick, 2008) using full matrix least squares minimisation on  $F^2$ .

**Crystal Data.**  $\text{C}_{12}\text{H}_{30}\text{AlN}$ ,  $M_r = 215.35$ , orthorhombic,  $P2_12_12_1$  (No. 19),  $a = 7.5824(2) \text{ \AA}$ ,  $b = 12.9289(3) \text{ \AA}$ ,  $c = 15.4855(3) \text{ \AA}$ ,  $\alpha = \beta = \gamma = 90^\circ$ ,  $V = 1518.08(6) \text{ \AA}^3$ ,  $T = 100.01(10) \text{ K}$ ,  $Z = 4$ ,  $Z' = 1$ ,  $\mu(\text{Cu K}\alpha) = 0.920$ , 6059 reflections measured, 2769 unique ( $R_{int} = 0.0371$ ) which were used in all calculations. The final  $wR_2$  was 0.1047 (all data) and  $R_1$  was 0.0396 ( $I > 2(I)$ ).

| Compound                      | Pr2NAlMe3                              |
|-------------------------------|----------------------------------------|
| CCDC                          | 1986516                                |
| Formula                       | $\text{C}_{12}\text{H}_{30}\text{AlN}$ |
| $D_{calc.}/ \text{g cm}^{-3}$ | 0.942                                  |
| $\mu/\text{mm}^{-1}$          | 0.920                                  |
| Formula Weight                | 215.35                                 |
| Colour                        | colourless                             |
| Shape                         | block                                  |
| Size/ $\text{mm}^3$           | $0.16 \times 0.12 \times 0.12$         |
| $T/\text{K}$                  | 100.01(10)                             |
| Crystal System                | orthorhombic                           |
| Flack Parameter               | 0.03(3)                                |
| Hooft Parameter               | 0.02(2)                                |
| Space Group                   | $P2_12_12_1$                           |
| $a/\text{\AA}$                | 7.5824(2)                              |
| $b/\text{\AA}$                | 12.9289(3)                             |
| $c/\text{\AA}$                | 15.4855(3)                             |
| $\alpha^\circ$                | 90                                     |
| $\beta^\circ$                 | 90                                     |
| $\gamma^\circ$                | 90                                     |
| $V/\text{\AA}^3$              | 1518.08(6)                             |
| $Z$                           | 4                                      |
| $Z'$                          | 1                                      |
| Wavelength/ $\text{\AA}$      | 1.54184                                |
| Radiation type                | Cu $\text{K}\alpha$                    |
| $\theta_{min}^\circ$          | 4.455                                  |
| $\theta_{max}^\circ$          | 77.060                                 |
| Measured Refl's.              | 6059                                   |
| Ind't Refl's                  | 2769                                   |
| Refl's with $I > 2(I)$        | 2643                                   |
| $R_{int}$                     | 0.0371                                 |
| Parameters                    | 133                                    |
| Restraints                    | 0                                      |
| Largest Peak                  | 0.215                                  |
| Deepest Hole                  | -0.283                                 |
| Goof                          | 1.026                                  |
| $wR_2$ (all data)             | 0.1047                                 |
| $wR_2$                        | 0.1027                                 |
| $R_1$ (all data)              | 0.0413                                 |
| $R_1$                         | 0.0396                                 |

## Structure Quality Indicators

|                     |             |                 |                 |                          |              |
|---------------------|-------------|-----------------|-----------------|--------------------------|--------------|
| <b>Reflections:</b> |             | $I/\sigma$ 22.8 | $R_{int}$ 3.71% | complete 100% (IUCr) 93% |              |
| <b>Refinement:</b>  | Shift 0.000 | Max Peak 0.2    | Min Peak -0.3   | Goof 1.026               | Flack .03(3) |

A colourless block-shaped crystal with dimensions  $0.16 \times 0.12 \times 0.12$  mm<sup>3</sup> was mounted on a nylon loop with paratone oil. Data were collected using a XtaLAB Synergy, Dualflex, HyPix diffractometer equipped with an Oxford Cryosystems low-temperature device, operating at  $T = 100.01(10)$  K.

Data were measured using  $\omega$  scans of  $0.5^\circ$  per frame for 0.1 s using Cu K $\alpha$  radiation (micro-focus sealed X-ray tube, 50 kV, 1 mA). The total number of runs and images was based on the strategy calculation from the program **CrysAlisPro** (Rigaku, V1.171.40.69a, 2020). The actually achieved resolution was  $\Theta = 77.060$ .

Cell parameters were retrieved using the **CrysAlisPro** (Rigaku, V1.171.40.69a, 2020) software and refined using **CrysAlisPro** (Rigaku, V1.171.40.69a, 2020) on 3673 reflections, 61 % of the observed reflections. Data reduction was performed using the **CrysAlisPro** (Rigaku, V1.171.40.69a, 2020) software which corrects for Lorentz polarization. The final completeness is 99.60 out to 77.060 in  $\Theta$  CrysAlisPro 1.171.40.69a (Rigaku Oxford Diffraction, 2020) Empirical absorption correction using spherical harmonics, implemented in SCALE3 ABSPACK scaling algorithm.

The structure was solved in the space group  $P2_12_12_1$  (# 19) by using dual methods using the ShelXT 2018/2 (Sheldrick, 2018) structure solution program. The structure was refined by Least Squares using version 2014/6 of **XL** (Sheldrick, 2008) incorporated in **Olex2** (Dolomanov et al., 2009). All non-hydrogen atoms were refined anisotropically. Hydrogen atom positions were calculated geometrically and refined using the riding model, except for the hydrogen atom on the non-carbon atom(s) which were found by difference Fourier methods and refined isotropically when data permits.

**CCDC 1986516 contains the supplementary crystallographic data for this paper. The data can be obtained free of charge from The Cambridge Crystallographic Data Centre via [www.ccdc.cam.ac.uk/structures](http://www.ccdc.cam.ac.uk/structures).**

There is a single molecule in the asymmetric unit, which is represented by the reported sum formula. In other words:  $Z$  is 4 and  $Z'$  is 1.

The Flack parameter was refined to 0.03(3). Determination of absolute structure using Bayesian statistics on Bijvoet differences using the Olex2 results in 0.02(2). Note: The Flack parameter is used to determine chirality of the crystal studied, the value should be near 0, a value of 1 means that the stereochemistry is wrong and the model should be inverted. A value of 0.5 means that the crystal consists of a racemic mixture of the two enantiomers.

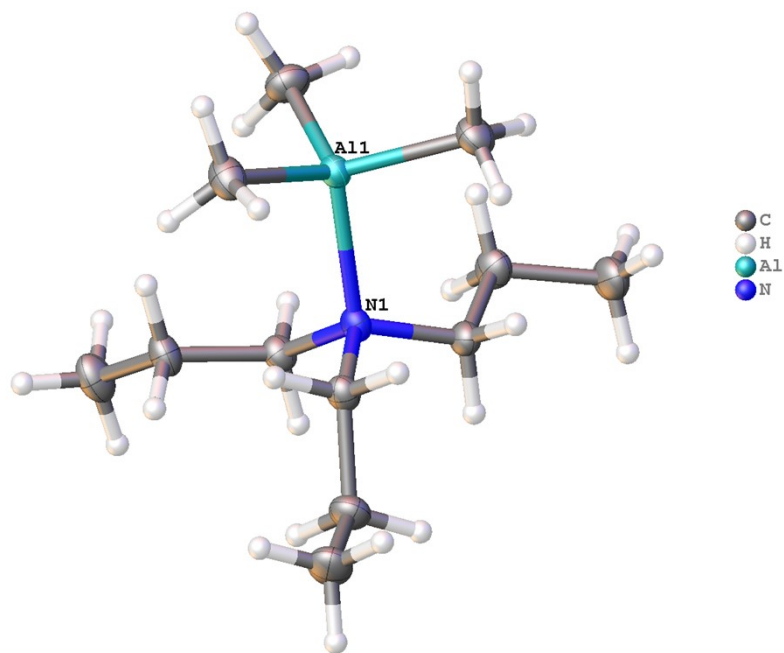

Figure S 41:

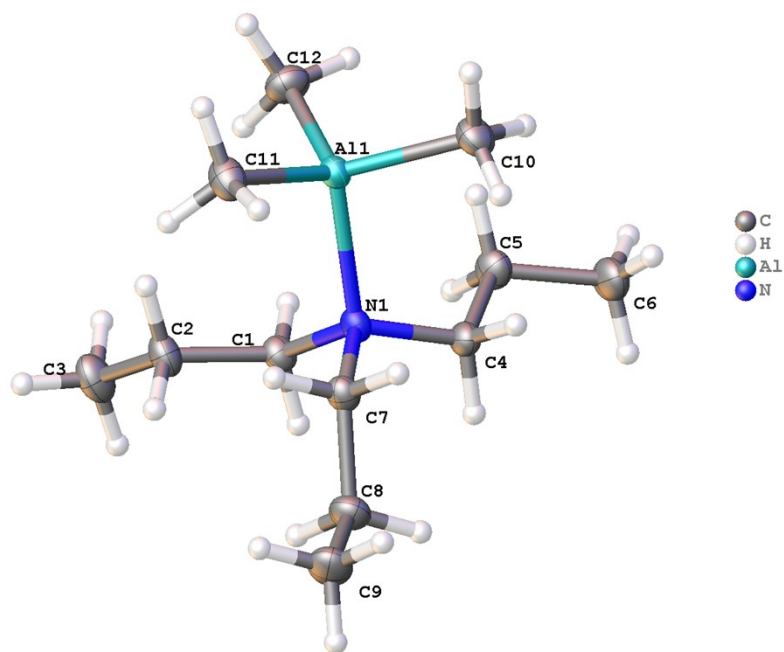

Figure S 42:

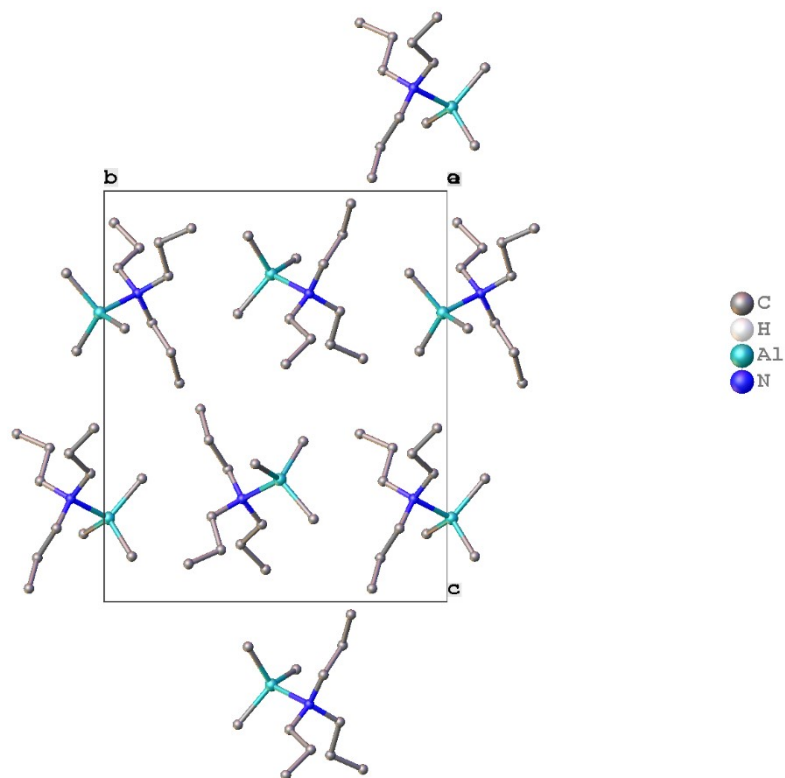

Figure S 43: Packing diagram of Pr<sub>2</sub>NAIme<sub>3</sub>.

Data Plots: Diffraction Data

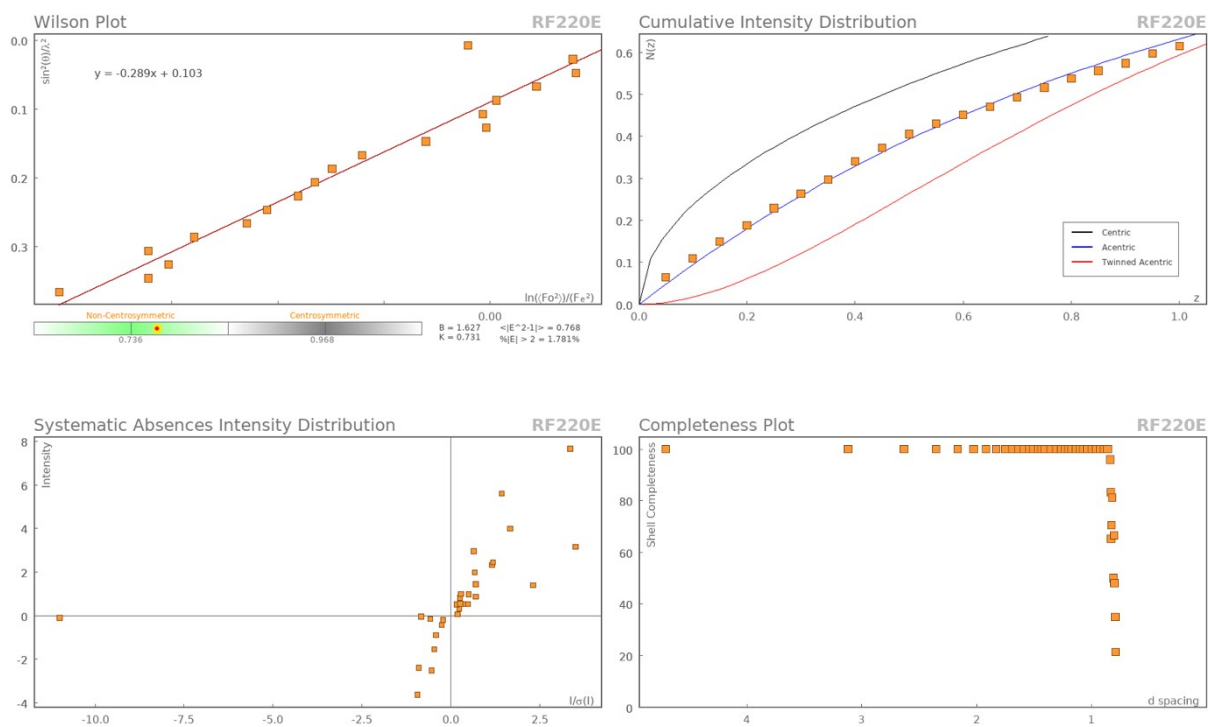

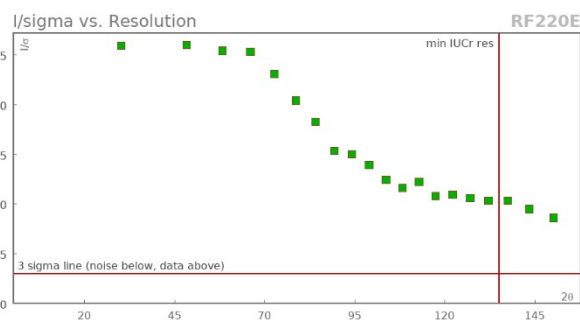

## Data Plots: Refinement and Data

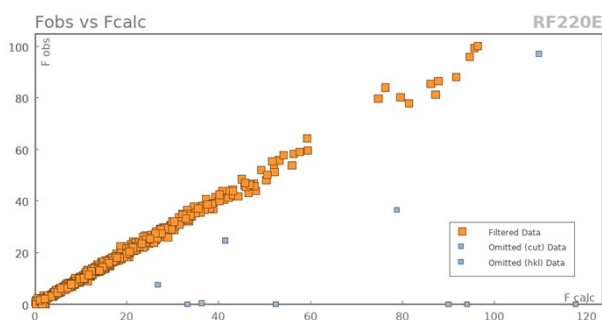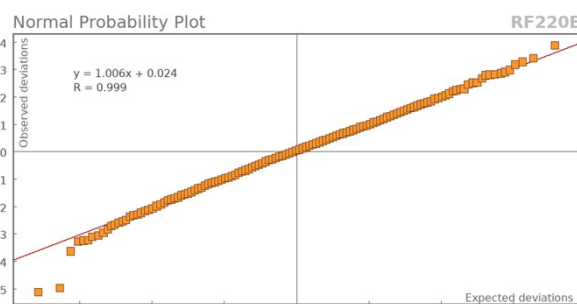

## Reflection Statistics

|                                     |                          |                            |                |
|-------------------------------------|--------------------------|----------------------------|----------------|
| Total reflections (after filtering) | 6103                     | Unique reflections         | 2769           |
| Completeness                        | 0.863                    | Mean $I/\sigma$            | 16.63          |
| $hkl_{\max}$ collected              | (9, 15, 13)              | $hkl_{\min}$ collected     | (-8, -16, -19) |
| $hkl_{\max}$ used                   | (9, 16, 19)              | $hkl_{\min}$ used          | (-9, 0, 0)     |
| Lim $d_{\max}$ collected            | 100.0                    | Lim $d_{\min}$ collected   | 0.77           |
| $d_{\max}$ used                     | 15.49                    | $d_{\min}$ used            | 0.79           |
| Friedel pairs                       | 261                      | Friedel pairs merged       | 0              |
| Inconsistent equivalents            | 3                        | $R_{\text{int}}$           | 0.0371         |
| $R_{\text{sigma}}$                  | 0.0439                   | Intensity transformed      | 0              |
| Omitted reflections                 | 0                        | Omitted by user (OMIT hkl) | 13             |
| Multiplicity                        | (3188, 1023, 209, 53, 6) | Maximum multiplicity       | 7              |
| Removed systematic absences         | 31                       | Filtered off (Shel/OMIT)   | 0              |

## Images of the Crystal on the Diffractometer

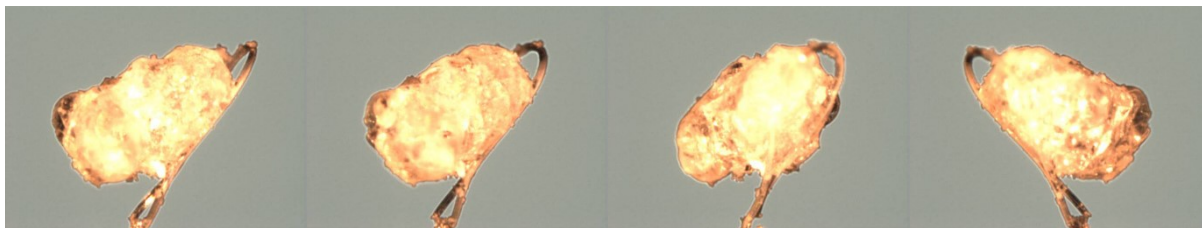

**Table 7:** Fractional Atomic Coordinates ( $\times 10^4$ ) and Equivalent Isotropic Displacement Parameters ( $\text{\AA}^2 \times 10^3$ ) for **Pr2NAIME3**.  $U_{eq}$  is defined as 1/3 of the trace of the orthogonalised  $U_{ij}$ .

| Atom | x         | y         | z         | $U_{eq}$  |
|------|-----------|-----------|-----------|-----------|
| All  | 7886.6(8) | 4873.3(5) | 7028.7(4) | 20.43(19) |

| Atom | x        | y          | z          | $U_{eq}$ |
|------|----------|------------|------------|----------|
| N1   | 6132(2)  | 5977.2(14) | 7501.6(11) | 19.8(4)  |
| C1   | 7043(3)  | 6869.1(15) | 7932.4(13) | 22.2(4)  |
| C2   | 8086(3)  | 6595.1(18) | 8739.2(13) | 26.9(5)  |
| C3   | 9038(4)  | 7543(2)    | 9084.0(16) | 34.2(6)  |
| C4   | 5004(3)  | 6392.9(18) | 6782.7(13) | 23.0(5)  |
| C5   | 6008(3)  | 6949.2(19) | 6064.2(14) | 27.5(5)  |
| C6   | 4762(3)  | 7194(2)    | 5317.1(15) | 34.9(6)  |
| C7   | 4958(3)  | 5405.2(17) | 8118.7(12) | 22.8(4)  |
| C8   | 3559(3)  | 6022(2)    | 8605.6(15) | 29.5(5)  |
| C9   | 2585(3)  | 5294(2)    | 9221.0(15) | 35.3(6)  |
| C10  | 6506(3)  | 4197.2(18) | 6099.6(15) | 29.5(5)  |
| C11  | 8376(3)  | 3898.2(18) | 7992.7(15) | 30.6(5)  |
| C12  | 10054(3) | 5598.3(19) | 6649.4(16) | 30.7(5)  |

**Table 8.** Anisotropic Displacement Parameters ( $\times 10^4$ ) for **Pr2NAlMe3**. The anisotropic displacement factor exponent takes the form:  $-2\pi^2[h^2a^{*2} \times U_{11} + \dots + 2hka^* \times b^* \times U_{12}]$

| Atom | $U_{11}$ | $U_{22}$ | $U_{33}$ | $U_{23}$ | $U_{13}$ | $U_{12}$  |
|------|----------|----------|----------|----------|----------|-----------|
| Al1  | 22.6(3)  | 21.4(3)  | 17.3(3)  | 0.0(2)   | -0.6(2)  | 0.4(2)    |
| N1   | 23.2(8)  | 21.0(9)  | 15.2(8)  | 2.4(7)   | -0.6(7)  | -1.1(7)   |
| C1   | 27.1(10) | 19.3(9)  | 20.1(10) | -0.5(8)  | -0.4(10) | -1.6(8)   |
| C2   | 34.6(12) | 27.2(11) | 19.0(10) | 0.3(8)   | -3.8(9)  | -4.4(10)  |
| C3   | 43.0(14) | 34.5(13) | 25.0(11) | -2.1(10) | -3.6(11) | -10.9(12) |
| C4   | 23.7(10) | 26.1(11) | 19.3(10) | 2.0(9)   | -1.9(8)  | 4.1(9)    |
| C5   | 29.1(11) | 31.5(12) | 22.1(10) | 7.0(9)   | 0.2(10)  | 0.8(10)   |
| C6   | 38.1(13) | 45.8(15) | 20.9(11) | 6.5(11)  | -2.1(11) | 5.9(12)   |
| C7   | 24.6(10) | 25.1(10) | 18.6(10) | 2.4(8)   | 0.7(8)   | -2.5(9)   |
| C8   | 28.9(10) | 36.1(13) | 23.5(11) | 0.1(10)  | 6.0(9)   | 1.0(10)   |
| C9   | 31.0(12) | 48.7(16) | 26.2(11) | 3.1(11)  | 8.3(9)   | -2.2(11)  |
| C10  | 35.4(12) | 27.4(12) | 25.6(11) | -4.2(9)  | -1.4(10) | 1.3(10)   |
| C11  | 41.2(12) | 24.3(11) | 26.2(11) | 1.6(10)  | -4.9(10) | 3.2(9)    |
| C12  | 24.8(11) | 32.5(13) | 34.7(12) | 3.2(11)  | 4.7(10)  | -0.7(9)   |

**Table 9:** Bond Lengths in Å for **Pr2NAlMe3**.

| Atom | Atom | Length/Å   | Atom | Atom | Length/Å |
|------|------|------------|------|------|----------|
| Al1  | N1   | 2.0841(18) | C1   | C2   | 1.520(3) |
| Al1  | C10  | 1.982(2)   | C2   | C3   | 1.519(3) |
| Al1  | C11  | 1.989(2)   | C4   | C5   | 1.528(3) |
| Al1  | C12  | 1.981(2)   | C5   | C6   | 1.527(3) |
| N1   | C1   | 1.501(3)   | C7   | C8   | 1.527(3) |
| N1   | C4   | 1.503(3)   | C8   | C9   | 1.529(3) |
| N1   | C7   | 1.501(3)   |      |      |          |

**Table 10:** Bond Angles in ° for **Pr2NAlMe3**.

| Atom | Atom | Atom | Angle/°    | Atom | Atom | Atom | Angle/°    |
|------|------|------|------------|------|------|------|------------|
| C10  | Al1  | N1   | 102.70(9)  | C4   | N1   | Al1  | 110.35(13) |
| C10  | Al1  | C11  | 111.34(10) | C7   | N1   | Al1  | 105.36(13) |
| C11  | Al1  | N1   | 106.83(9)  | C7   | N1   | C4   | 108.09(16) |
| C12  | Al1  | N1   | 108.05(9)  | N1   | C1   | C2   | 115.20(17) |
| C12  | Al1  | C10  | 115.57(11) | C3   | C2   | C1   | 110.37(19) |
| C12  | Al1  | C11  | 111.56(11) | N1   | C4   | C5   | 115.10(17) |
| C1   | N1   | Al1  | 112.87(13) | C6   | C5   | C4   | 109.92(18) |
| C1   | N1   | C4   | 108.44(16) | N1   | C7   | C8   | 117.99(18) |
| C1   | N1   | C7   | 111.62(16) | C7   | C8   | C9   | 108.8(2)   |

**Table 11:** Torsion Angles in ° for Pr2NAlMe3.

| Atom | Atom | Atom | Atom | Angle/°     |
|------|------|------|------|-------------|
| Al1  | N1   | C1   | C2   | -63.8(2)    |
| Al1  | N1   | C4   | C5   | -62.0(2)    |
| Al1  | N1   | C7   | C8   | 177.58(15)  |
| N1   | C1   | C2   | C3   | 176.44(19)  |
| N1   | C4   | C5   | C6   | 171.84(19)  |
| N1   | C7   | C8   | C9   | -177.51(18) |
| C1   | N1   | C4   | C5   | 62.1(2)     |
| C1   | N1   | C7   | C8   | 54.7(2)     |
| C4   | N1   | C1   | C2   | 173.64(18)  |
| C4   | N1   | C7   | C8   | -64.4(2)    |
| C7   | N1   | C1   | C2   | 54.7(2)     |
| C7   | N1   | C4   | C5   | -176.70(18) |

**Table 12:** Hydrogen Fractional Atomic Coordinates ( $\times 10^4$ ) and Equivalent Isotropic Displacement Parameters ( $\text{\AA}^2 \times 10^3$ ) for **Pr<sub>2</sub>NAlMe<sub>3</sub>**.  $U_{eq}$  is defined as 1/3 of the trace of the orthogonalised  $U_{ij}$ .

| Atom | x        | y       | z       | $U_{eq}$ |
|------|----------|---------|---------|----------|
| H1A  | 6144.07  | 7392.38 | 8088.27 | 27       |
| H1B  | 7854.62  | 7191.96 | 7510.62 | 27       |
| H2A  | 7276.02  | 6323.28 | 9186.5  | 32       |
| H2B  | 8955.38  | 6048.61 | 8600.94 | 32       |
| H3A  | 9893.54  | 7784.71 | 8654.76 | 51       |
| H3B  | 9654.88  | 7363.73 | 9619.54 | 51       |
| H3C  | 8179.3   | 8092.39 | 9200.16 | 51       |
| H4A  | 4134.01  | 6879.2  | 7032.16 | 28       |
| H4B  | 4339.43  | 5810.99 | 6524.4  | 28       |
| H5A  | 6521.96  | 7598.62 | 6291.12 | 33       |
| H5B  | 6984.89  | 6506.04 | 5856.46 | 33       |
| H6A  | 5414.6   | 7548.92 | 4858.41 | 52       |
| H6B  | 3805.92  | 7640.7  | 5523    | 52       |
| H6C  | 4264.1   | 6549.11 | 5090.48 | 52       |
| H7A  | 5720.12  | 5061.6  | 8551.37 | 27       |
| H7B  | 4349.5   | 4852.69 | 7791.36 | 27       |
| H8A  | 2715.36  | 6332.24 | 8191.94 | 35       |
| H8B  | 4122.82  | 6587.59 | 8936.33 | 35       |
| H9A  | 2041.85  | 4731.76 | 8890    | 53       |
| H9B  | 1667.54  | 5679.06 | 9529.44 | 53       |
| H9C  | 3422.46  | 5003.79 | 9637.94 | 53       |
| H10A | 7107.81  | 3563.49 | 5915.9  | 44       |
| H10B | 6399.54  | 4669.37 | 5607.3  | 44       |
| H10C | 5327.83  | 4024.4  | 6316.28 | 44       |
| H11A | 8637.01  | 4290.81 | 8518.78 | 46       |
| H11B | 9391.33  | 3464.15 | 7844.07 | 46       |
| H11C | 7341.52  | 3459.28 | 8090.24 | 46       |
| H12A | 9896.14  | 5851.17 | 6057.91 | 46       |
| H12B | 11053.98 | 5118.25 | 6667.95 | 46       |
| H12C | 10285.43 | 6184.02 | 7034.86 | 46       |

### Citations

CrysAlisPro Software System, Rigaku Oxford Diffraction, (2020).

O.V. Dolomanov and L.J. Bourhis and R.J. Gildea and J.A.K. Howard and H. Puschmann, Olex2: A complete structure solution, refinement and analysis program, *J. Appl. Cryst.*, (2009), **42**, 339-341.

Sheldrick, G.M., A short history of ShelX, *Acta Cryst.*, (2008), **A64**, 339-341.



## Computationally Estimated Parameters.

**Table 13. Triad binding energies.**

| Triad     | Binding Energy (kT) |
|-----------|---------------------|
| I-M + LA  | 3.943               |
| I-M + LB  | 8.484               |
| LA-LB + M | 8.733               |
| LA-LB + I | -8.461              |
| LA-M + LB | 5.728               |
| LA-M + I  | 6.874               |
| I-LA + LB | -4.358              |
| I-LA + M  | 13.983              |
| LB-I + M  | 12.894              |
| LB-I + LA | -9.988              |
| LB-M + LA | -12.283             |
| LB-M + I  | -6.596              |

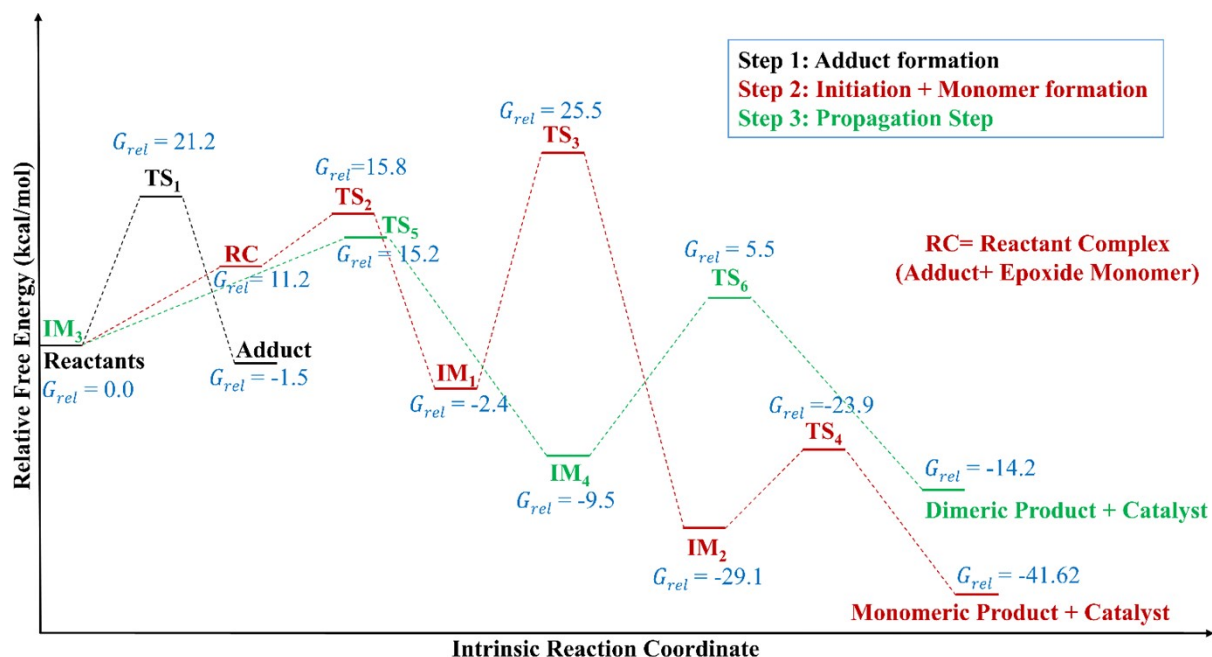

**Figure S44.** The relative free energy plot for reactants, reactant complex (RC), intermediates (IMs), transition states (TSs) and products are provided for all three steps in a same graph. Different color lines are used to represent different steps. The relative free energies given here are computed at B3LYP-D3/Def2-TZVP level.

## Our "Heart" Mechanism

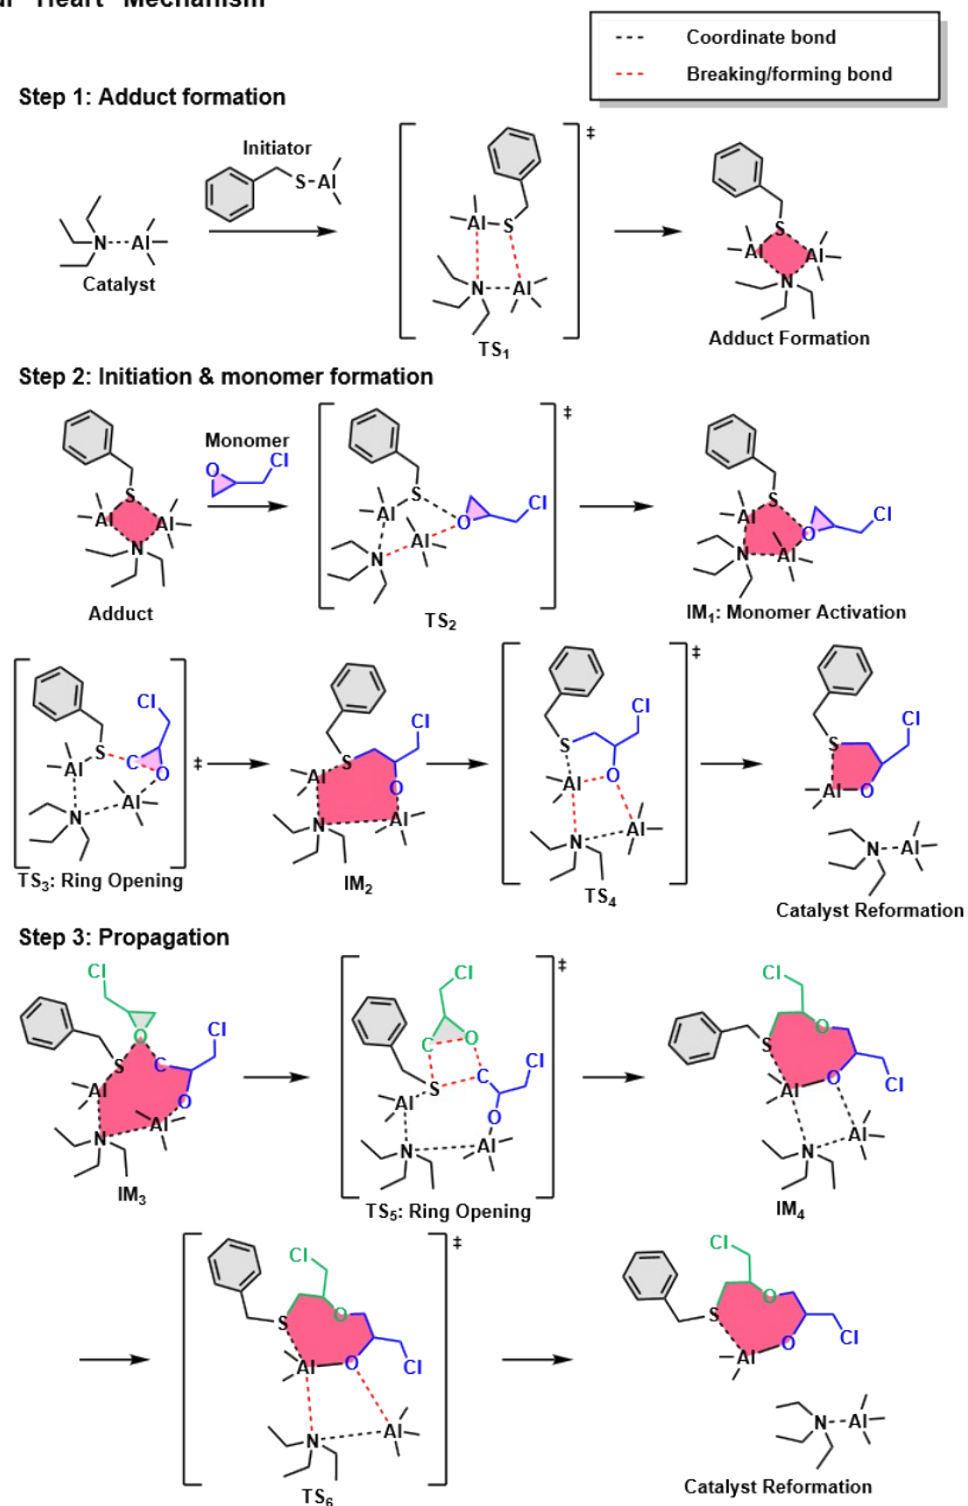

**Figure S45.** Overview of the adduct formation, initiation, and propagation steps including transition states.

XYZ coordinates of the optimized catalysts.

### Cy<sub>2</sub>MeNAI Me<sub>3</sub>

52

Cy<sub>2</sub>MeNAI Me<sub>3</sub>

|    |          |          |          |
|----|----------|----------|----------|
| Al | -0.16344 | 2.33239  | -0.21493 |
| N  | -0.03434 | 0.28870  | 0.62076  |
| C  | -0.21866 | 0.44911  | 2.08320  |
| H  | 0.62097  | 1.01538  | 2.48460  |
| H  | -0.27257 | -0.50963 | 2.60082  |
| H  | -1.12214 | 1.01193  | 2.28714  |
| C  | -1.12934 | -0.55233 | -0.00188 |
| H  | -0.99142 | -0.43462 | -1.07683 |
| C  | -1.09812 | -2.05754 | 0.30766  |
| H  | -0.13677 | -2.48802 | 0.04258  |
| H  | -1.24011 | -2.22416 | 1.37988  |
| C  | -2.18943 | -2.79739 | -0.47858 |
| H  | -1.96354 | -2.72130 | -1.54837 |
| H  | -2.15741 | -3.86105 | -0.23009 |
| C  | -3.58262 | -2.22643 | -0.22063 |
| H  | -4.32280 | -2.73636 | -0.84212 |
| H  | -3.86381 | -2.41383 | 0.82203  |
| C  | -3.60359 | -0.72100 | -0.48329 |
| H  | -4.58248 | -0.30197 | -0.23938 |
| H  | -3.43809 | -0.53034 | -1.54904 |
| C  | -2.52449 | -0.00458 | 0.33223  |
| H  | -2.73650 | -0.15541 | 1.39445  |
| H  | -2.57010 | 1.06579  | 0.14761  |
| C  | 1.38658  | -0.17974 | 0.33742  |
| H  | 1.98508  | 0.70392  | 0.56087  |
| C  | 1.61579  | -0.50051 | -1.14219 |
| H  | 1.21938  | 0.30027  | -1.76484 |
| H  | 1.08468  | -1.41476 | -1.42002 |
| C  | 3.10868  | -0.68883 | -1.43048 |
| H  | 3.24763  | -0.93770 | -2.48506 |
| H  | 3.62816  | 0.25998  | -1.26104 |
| C  | 3.72039  | -1.76919 | -0.53818 |
| H  | 3.27681  | -2.74004 | -0.78838 |
| H  | 4.79315  | -1.85679 | -0.72699 |
| C  | 3.46376  | -1.46409 | 0.93794  |
| H  | 3.99214  | -0.54437 | 1.21280  |
| H  | 3.86980  | -2.25755 | 1.57005  |
| C  | 1.96693  | -1.29331 | 1.23180  |
| H  | 1.84131  | -1.04908 | 2.28643  |
| H  | 1.46436  | -2.24589 | 1.06685  |
| C  | 1.71383  | 2.99500  | -0.25006 |
| H  | 2.21450  | 2.99725  | 0.72444  |
| H  | 1.67339  | 4.04411  | -0.56810 |
| H  | 2.37548  | 2.48585  | -0.95751 |
| C  | -0.97862 | 2.11515  | -2.01999 |
| H  | -0.40242 | 1.49857  | -2.71683 |
| H  | -1.02964 | 3.11284  | -2.47317 |
| H  | -2.00209 | 1.72871  | -2.02253 |
| C  | -1.26200 | 3.36321  | 1.08789  |
| H  | -2.27452 | 2.99484  | 1.27724  |

|   |          |         |         |
|---|----------|---------|---------|
| H | -1.37668 | 4.37634 | 0.68328 |
| H | -0.77317 | 3.47987 | 2.06079 |

### CyMe<sub>2</sub>NAI Me<sub>3</sub>

39

CyMe<sub>2</sub>NAI Me<sub>3</sub>

|    |          |          |          |
|----|----------|----------|----------|
| Al | -2.06677 | -0.53009 | -0.18122 |
| N  | -0.47330 | 0.87992  | 0.19534  |
| C  | -0.55683 | 1.28688  | 1.61713  |
| H  | -1.57862 | 1.59533  | 1.83365  |
| H  | 0.11226  | 2.12289  | 1.83571  |
| H  | -0.31305 | 0.44880  | 2.26290  |
| C  | 0.88483  | 0.32508  | -0.18210 |
| H  | 0.79599  | 0.11943  | -1.25180 |
| C  | 2.05735  | 1.29884  | 0.01868  |
| H  | 1.87072  | 2.25234  | -0.47576 |
| H  | 2.18411  | 1.50875  | 1.08502  |
| C  | 3.35891  | 0.69768  | -0.52722 |
| H  | 3.26532  | 0.56636  | -1.61101 |
| H  | 4.18054  | 1.40023  | -0.36850 |
| C  | 3.67221  | -0.65128 | 0.12010  |
| H  | 4.57479  | -1.08285 | -0.31939 |
| H  | 3.88216  | -0.49977 | 1.18511  |
| C  | 2.49226  | -1.61137 | -0.02942 |
| H  | 2.69531  | -2.55241 | 0.48655  |
| H  | 2.35570  | -1.85921 | -1.08776 |
| C  | 1.19455  | -1.00286 | 0.51284  |
| H  | 1.29900  | -0.84512 | 1.59031  |
| H  | 0.37517  | -1.70250 | 0.37256  |
| C  | -3.67275 | 0.64341  | -0.28308 |
| H  | -3.79196 | 1.32244  | 0.56927  |
| H  | -4.56087 | 0.00048  | -0.27633 |
| H  | -3.73817 | 1.24870  | -1.19267 |
| C  | -1.48929 | -1.32147 | -1.91225 |
| H  | -2.29252 | -1.95346 | -2.30784 |
| H  | -0.60097 | -1.95782 | -1.84838 |
| H  | -1.29138 | -0.56912 | -2.68429 |
| C  | -2.14961 | -1.71758 | 1.41424  |
| H  | -1.33653 | -2.43933 | 1.52851  |
| H  | -3.07425 | -2.30335 | 1.34488  |
| H  | -2.22061 | -1.16141 | 2.35541  |
| C  | -0.78839 | 2.05639  | -0.65345 |
| H  | -0.74776 | 1.76879  | -1.70308 |
| H  | -1.79224 | 2.40406  | -0.42844 |
| H  | -0.09036 | 2.87716  | -0.47905 |

### Et<sub>3</sub>NAIEt<sub>3</sub>

44

Et<sub>3</sub>NAIEt<sub>3</sub>

|    |          |          |          |
|----|----------|----------|----------|
| Al | 0.92763  | 0.15069  | -0.21317 |
| N  | -1.21865 | 0.00393  | -0.01761 |
| C  | -1.62401 | -0.95382 | 1.05870  |
| H  | -2.69537 | -0.83124 | 1.25419  |
| H  | -1.09843 | -0.64790 | 1.96036  |

|   |          |          |          |
|---|----------|----------|----------|
| C | -1.31811 | -2.41850 | 0.78411  |
| H | -1.90435 | -2.82266 | -0.04073 |
| H | -0.26448 | -2.57803 | 0.56766  |
| C | -1.79259 | 1.35590  | 0.28559  |
| H | -2.88328 | 1.29040  | 0.23930  |
| H | -1.46908 | 2.01754  | -0.51678 |
| C | -1.40236 | 1.95368  | 1.63023  |
| H | -1.81815 | 1.39564  | 2.46867  |
| H | -0.32468 | 2.01487  | 1.75617  |
| C | -1.69573 | -0.42950 | -1.37220 |
| H | -1.18244 | -1.35627 | -1.61273 |
| H | -1.32927 | 0.31615  | -2.07906 |
| C | -3.20056 | -0.61771 | -1.55350 |
| H | -3.76014 | 0.31182  | -1.45569 |
| H | -3.61545 | -1.34183 | -0.85169 |
| C | 1.20642  | 1.90319  | -1.13800 |
| H | 2.16925  | 1.74386  | -1.64471 |
| H | 0.49639  | 2.02916  | -1.96708 |
| C | 1.46407  | -1.34698 | -1.43161 |
| H | 1.07304  | -2.32431 | -1.12620 |
| H | 1.05922  | -1.17661 | -2.43747 |
| C | 1.72306  | 0.00002  | 1.61527  |
| H | 1.27757  | 0.69069  | 2.33960  |
| H | 2.73968  | 0.39272  | 1.46445  |
| H | -3.37903 | -0.99982 | -2.55998 |
| H | -1.56517 | -2.99472 | 1.67697  |
| H | -1.80201 | 2.96765  | 1.68186  |
| C | 2.99966  | -1.44550 | -1.53450 |
| H | 3.45586  | -1.65888 | -0.56359 |
| H | 3.32888  | -2.23180 | -2.22198 |
| H | 3.44002  | -0.50928 | -1.89043 |
| C | 1.29614  | 3.21496  | -0.34142 |
| H | 1.97478  | 3.12106  | 0.51109  |
| H | 1.65633  | 4.05375  | -0.94653 |
| H | 0.32688  | 3.51724  | 0.06315  |
| C | 1.83845  | -1.39404 | 2.25591  |
| H | 2.25671  | -2.12601 | 1.55946  |
| H | 2.47640  | -1.39881 | 3.14595  |
| H | 0.86501  | -1.78114 | 2.56869  |

### Et<sub>3</sub>NAl<sub>i</sub>Bu<sub>3</sub>

62

Et<sub>3</sub>NAl<sub>i</sub>Bu<sub>3</sub>

|    |          |          |          |
|----|----------|----------|----------|
| Al | 0.05672  | 0.12721  | 0.00368  |
| C  | 0.54249  | -1.04964 | 1.55586  |
| H  | 0.00080  | -0.81562 | 2.48129  |
| H  | 0.21331  | -2.06092 | 1.28761  |
| C  | 0.59349  | 2.06547  | 0.08607  |
| H  | -0.27607 | 2.70641  | -0.10058 |
| H  | 0.90321  | 2.31927  | 1.10881  |
| C  | 0.46958  | -0.74126 | -1.76513 |
| H  | 1.19334  | -0.05756 | -2.22843 |
| H  | -0.37402 | -0.74265 | -2.46769 |
| C  | 1.71048  | 2.51457  | -0.87745 |
| H  | 1.40685  | 2.25746  | -1.90060 |

|   |          |          |          |
|---|----------|----------|----------|
| C | 2.04943  | -1.11449 | 1.89810  |
| H | 2.63551  | -1.04967 | 0.97209  |
| C | 1.08322  | -2.15694 | -1.77138 |
| H | 1.83206  | -2.22329 | -0.97270 |
| C | 1.92303  | 4.03277  | -0.83843 |
| H | 2.69412  | 4.35382  | -1.54517 |
| H | 1.00018  | 4.56501  | -1.08168 |
| H | 2.23323  | 4.34867  | 0.16221  |
| C | 3.03305  | 1.79389  | -0.59887 |
| H | 3.38579  | 2.01658  | 0.41169  |
| H | 2.93240  | 0.70949  | -0.68003 |
| H | 3.81170  | 2.10570  | -1.29945 |
| C | 2.42456  | -2.44166 | 2.56726  |
| H | 2.18925  | -3.28818 | 1.91791  |
| H | 3.49088  | -2.48736 | 2.80838  |
| H | 1.86315  | -2.57014 | 3.49782  |
| C | 2.47106  | 0.05867  | 2.78701  |
| H | 2.22611  | 1.01778  | 2.33175  |
| H | 1.95516  | 0.00616  | 3.75103  |
| H | 3.54611  | 0.04489  | 2.98335  |
| C | 1.80171  | -2.45831 | -3.09237 |
| H | 2.59255  | -1.72940 | -3.28285 |
| H | 2.25385  | -3.45472 | -3.09182 |
| H | 1.09813  | -2.40915 | -3.92935 |
| C | 0.03014  | -3.23390 | -1.49721 |
| H | -0.43677 | -3.10250 | -0.52044 |
| H | -0.75817 | -3.19885 | -2.25668 |
| H | 0.46612  | -4.23578 | -1.51968 |
| N | -2.11422 | 0.24006  | 0.07593  |
| C | -2.58857 | 1.35262  | 0.95741  |
| H | -3.68168 | 1.39508  | 0.90930  |
| H | -2.21858 | 2.27833  | 0.52656  |
| C | -2.13590 | 1.27612  | 2.40734  |
| H | -2.51798 | 0.39388  | 2.92064  |
| H | -1.05077 | 1.27881  | 2.49121  |
| C | -2.67386 | 0.44342  | -1.30080 |
| H | -3.76148 | 0.53584  | -1.22495 |
| H | -2.46438 | -0.46780 | -1.85900 |
| C | -2.12969 | 1.63856  | -2.07159 |
| H | -2.36498 | 2.58851  | -1.59346 |
| H | -1.05224 | 1.58198  | -2.21074 |
| C | -2.56796 | -1.09783 | 0.58449  |
| H | -2.05735 | -1.27958 | 1.52569  |
| H | -2.18672 | -1.83525 | -0.12129 |
| C | -4.06918 | -1.29951 | 0.77608  |
| H | -4.63404 | -1.18748 | -0.14899 |
| H | -4.48785 | -0.62071 | 1.51962  |
| H | -4.23272 | -2.31648 | 1.13643  |
| H | -2.51446 | 2.15371  | 2.93379  |
| H | -2.59396 | 1.64620  | -3.05936 |

### Et<sub>3</sub>NAlMe<sub>3</sub>

35

Et<sub>3</sub>NAlMe<sub>3</sub>

|    |         |          |          |
|----|---------|----------|----------|
| Al | 1.42754 | -0.32425 | -0.21542 |
|----|---------|----------|----------|

|   |          |          |          |
|---|----------|----------|----------|
| N | -0.65281 | 0.23436  | -0.00721 |
| C | -1.18533 | -0.12201 | 1.34490  |
| H | -2.17656 | 0.32968  | 1.46460  |
| H | -0.52879 | 0.34820  | 2.07274  |
| C | -1.25828 | -1.61157 | 1.64592  |
| H | -1.97993 | -2.13330 | 1.01761  |
| H | -0.28979 | -2.09343 | 1.52899  |
| C | -0.81186 | 1.70955  | -0.22548 |
| H | -1.87760 | 1.95420  | -0.19172 |
| H | -0.45960 | 1.91422  | -1.23554 |
| C | -0.07595 | 2.61065  | 0.75680  |
| H | -0.46029 | 2.52258  | 1.77251  |
| H | 0.99264  | 2.41202  | 0.77309  |
| C | -1.36730 | -0.49438 | -1.10630 |
| H | -1.14332 | -1.55110 | -0.99153 |
| H | -0.89424 | -0.18205 | -2.03849 |
| C | -2.87895 | -0.29999 | -1.20275 |
| H | -3.16192 | 0.72770  | -1.42810 |
| H | -3.39436 | -0.60493 | -0.29141 |
| C | 2.06490  | 0.95833  | -1.59796 |
| H | 3.08608  | 0.67972  | -1.88320 |
| H | 2.10704  | 2.00693  | -1.28920 |
| H | 1.47646  | 0.91720  | -2.52194 |
| C | 1.41142  | -2.19793 | -0.89019 |
| H | 0.86676  | -2.92367 | -0.27842 |
| H | 2.45055  | -2.54779 | -0.92045 |
| H | 1.03153  | -2.28769 | -1.91324 |
| C | 2.16384  | -0.14082 | 1.62427  |
| H | 2.07577  | 0.85360  | 2.07128  |
| H | 3.23595  | -0.36833 | 1.59270  |
| H | 1.72684  | -0.85090 | 2.33460  |
| H | -3.25398 | -0.92605 | -2.01411 |
| H | -1.57261 | -1.73883 | 2.68299  |
| H | -0.21984 | 3.64569  | 0.44188  |

### Et<sub>3</sub>NAIPh<sub>3</sub>

56

Et<sub>3</sub>NAIPh<sub>3</sub>

|    |          |          |          |
|----|----------|----------|----------|
| Al | -0.03022 | -0.00882 | -0.22371 |
| N  | -0.03867 | -0.19265 | 1.92355  |
| C  | 0.70327  | 0.91639  | 2.60742  |
| H  | 0.49430  | 0.86149  | 3.68116  |
| H  | 0.26922  | 1.84604  | 2.24821  |
| C  | 2.20769  | 0.94358  | 2.38010  |
| H  | 2.71764  | 0.10477  | 2.85350  |
| H  | 2.46595  | 0.93685  | 1.32278  |
| C  | -1.44737 | -0.22386 | 2.44686  |
| H  | -1.41090 | -0.47741 | 3.50920  |
| H  | -1.95048 | -1.04069 | 1.93242  |
| C  | -2.24715 | 1.06239  | 2.28792  |
| H  | -1.87797 | 1.86086  | 2.93100  |
| H  | -2.25015 | 1.43238  | 1.26551  |
| C  | 0.59250  | -1.53124 | 2.18097  |
| H  | 1.58052  | -1.50611 | 1.73164  |
| H  | 0.00642  | -2.25835 | 1.61591  |

|   |          |          |          |
|---|----------|----------|----------|
| C | 0.71369  | -1.98124 | 3.63482  |
| H | -0.25067 | -2.16405 | 4.10684  |
| H | 1.26564  | -1.26648 | 4.24593  |
| H | 1.26749  | -2.92136 | 3.65324  |
| H | 2.60434  | 1.85985  | 2.82039  |
| H | -3.27887 | 0.85803  | 2.57909  |
| C | -0.48094 | 1.89277  | -0.60008 |
| C | -1.62772 | 2.20238  | -1.35093 |
| C | 0.30687  | 2.98619  | -0.20173 |
| C | -1.97980 | 3.51212  | -1.66627 |
| H | -2.26691 | 1.40104  | -1.70593 |
| C | -0.03286 | 4.30096  | -0.50635 |
| H | 1.22486  | 2.81936  | 0.35280  |
| C | -1.18473 | 4.56892  | -1.23819 |
| H | -2.87251 | 3.70751  | -2.24915 |
| H | 0.60284  | 5.11568  | -0.17889 |
| H | -1.45429 | 5.59002  | -1.47926 |
| C | 1.81294  | -0.48476 | -0.82540 |
| C | 2.58178  | 0.49873  | -1.47215 |
| C | 2.40739  | -1.75465 | -0.72181 |
| C | 3.86023  | 0.24429  | -1.96209 |
| H | 2.17332  | 1.49443  | -1.60483 |
| C | 3.68334  | -2.02512 | -1.20660 |
| H | 1.86546  | -2.57069 | -0.25511 |
| C | 4.41902  | -1.02077 | -1.82633 |
| H | 4.41785  | 1.03320  | -2.45358 |
| H | 4.10199  | -3.01993 | -1.10567 |
| H | 5.41301  | -1.22502 | -2.20544 |
| C | -1.42300 | -1.32983 | -0.75971 |
| C | -1.05438 | -2.51634 | -1.41625 |
| C | -2.80328 | -1.13872 | -0.56907 |
| C | -1.99068 | -3.45804 | -1.83669 |
| H | -0.00848 | -2.71106 | -1.62367 |
| C | -3.75102 | -2.06851 | -0.98506 |
| H | -3.16300 | -0.23494 | -0.08895 |
| C | -3.34529 | -3.23853 | -1.61831 |
| H | -1.66231 | -4.35988 | -2.34043 |
| H | -4.80555 | -1.87870 | -0.82071 |
| H | -4.07821 | -3.96621 | -1.94515 |

### **iBu<sub>3</sub>NAIEt<sub>3</sub>**

62

iBu<sub>3</sub>NAIEt<sub>3</sub>

|    |          |          |          |
|----|----------|----------|----------|
| Al | 1.22636  | -0.48570 | -0.74423 |
| N  | -0.54675 | 0.38503  | 0.14683  |
| C  | -1.04298 | -0.30751 | 1.38316  |
| H  | -1.99547 | 0.14682  | 1.67919  |
| H  | -0.33042 | -0.04684 | 2.15671  |
| C  | -1.19182 | -1.83660 | 1.40955  |
| H  | -0.28428 | -2.27887 | 0.99937  |
| C  | -0.31213 | 1.83406  | 0.48891  |
| H  | -1.12179 | 2.16905  | 1.14468  |
| H  | -0.41495 | 2.38010  | -0.44502 |
| C  | 1.02466  | 2.26258  | 1.11576  |



|   |          |          |          |
|---|----------|----------|----------|
| H | 1.83502  | 1.86028  | 0.50842  |
| C | -1.51464 | 0.29524  | -1.00412 |
| H | -1.50759 | -0.74264 | -1.31557 |
| H | -1.06796 | 0.85858  | -1.82581 |
| C | -2.98354 | 0.73432  | -0.84054 |
| H | -3.37792 | 0.32582  | 0.09248  |
| C | 1.75661  | 0.94247  | -2.05612 |
| H | 1.47490  | 0.58204  | -3.05412 |
| H | 1.19164  | 1.87394  | -1.92951 |
| C | 0.63477  | -2.15237 | -1.69089 |
| H | 0.02856  | -2.83406 | -1.08522 |
| H | 0.00605  | -1.89152 | -2.55178 |
| C | 2.62289  | -0.87019 | 0.63282  |
| H | 2.99614  | 0.03572  | 1.12015  |
| H | 3.46021  | -1.18962 | -0.00555 |
| C | 1.86847  | -2.92124 | -2.20706 |
| H | 2.50302  | -3.25972 | -1.38328 |
| H | 1.60155  | -3.80762 | -2.79215 |
| H | 2.49441  | -2.29460 | -2.85043 |
| C | 3.25881  | 1.28203  | -2.06079 |
| H | 3.86999  | 0.39574  | -2.25238 |
| H | 3.52501  | 2.02470  | -2.82049 |
| H | 3.58712  | 1.67980  | -1.09581 |
| C | 2.39146  | -1.95829 | 1.69111  |
| H | 2.03631  | -2.89025 | 1.24166  |
| H | 3.29829  | -2.20252 | 2.25448  |
| H | 1.63906  | -1.65839 | 2.42536  |
| C | -2.39616 | -2.40001 | 0.64932  |
| H | -3.32493 | -1.93022 | 0.98390  |
| H | -2.31818 | -2.27385 | -0.42717 |
| H | -2.48457 | -3.47155 | 0.83751  |
| C | -3.21317 | 2.25023  | -0.84235 |
| H | -2.81660 | 2.74312  | 0.04244  |
| H | -2.74945 | 2.71075  | -1.71892 |
| H | -4.28240 | 2.46777  | -0.88375 |
| C | 1.09494  | 3.79275  | 1.01677  |
| H | 2.03620  | 4.15997  | 1.42811  |
| H | 1.02900  | 4.13016  | -0.01949 |
| H | 0.28194  | 4.26237  | 1.57866  |
| C | -1.29119 | -2.25412 | 2.88421  |
| H | -1.37116 | -3.33857 | 2.97096  |
| H | -0.41721 | -1.93809 | 3.45551  |
| H | -2.17765 | -1.81772 | 3.35424  |
| C | 1.24365  | 1.82444  | 2.56565  |
| H | 0.40081  | 2.11930  | 3.19763  |
| H | 1.38845  | 0.75011  | 2.65949  |
| H | 2.14042  | 2.29990  | 2.96753  |
| C | -3.77672 | 0.09729  | -1.99075 |
| H | -4.83153 | 0.37042  | -1.93143 |
| H | -3.39896 | 0.44028  | -2.95804 |
| H | -3.71000 | -0.99160 | -1.97329 |

**iBu<sub>3</sub>NAl<sub>i</sub>Bu<sub>3</sub>**

iBu3NAl iBu3

|    |          |          |          |
|----|----------|----------|----------|
| Al | 0.80534  | 0.02771  | -0.34258 |
| N  | -1.35009 | 0.28541  | 0.09637  |
| C  | -1.92822 | -0.65837 | 1.11146  |
| H  | -3.01001 | -0.49055 | 1.16688  |
| H  | -1.52410 | -0.33103 | 2.06156  |
| C  | -1.66802 | -2.16868 | 1.01020  |
| H  | -0.60751 | -2.32287 | 0.81823  |
| C  | -1.63485 | 1.68756  | 0.56792  |
| H  | -2.65006 | 1.71436  | 0.97604  |
| H  | -1.63780 | 2.30657  | -0.32503 |
| C  | -0.69074 | 2.36008  | 1.57634  |
| H  | 0.32957  | 2.24706  | 1.21655  |
| C  | -1.94426 | 0.09606  | -1.27429 |
| H  | -1.59144 | -0.86821 | -1.61827 |
| H  | -1.47262 | 0.83756  | -1.92191 |
| C  | -3.47063 | 0.14902  | -1.49463 |
| H  | -3.96712 | -0.43169 | -0.71396 |
| C  | 1.16240  | 1.76314  | -1.30734 |
| H  | 1.44201  | 1.50638  | -2.33839 |
| H  | 0.22030  | 2.31456  | -1.41939 |
| C  | 0.85550  | -1.58201 | -1.54590 |
| H  | 0.23415  | -2.38575 | -1.13453 |
| H  | 0.40058  | -1.34541 | -2.51838 |
| C  | 1.82159  | -0.15693 | 1.37506  |
| H  | 1.81004  | 0.81895  | 1.87404  |
| H  | 2.86478  | -0.26248 | 1.03820  |
| C  | 2.25830  | -2.16812 | -1.82320 |
| H  | 2.79884  | -2.25747 | -0.87379 |
| C  | 2.21772  | 2.74829  | -0.76130 |
| H  | 2.05611  | 2.88755  | 0.31514  |
| C  | 1.57455  | -1.24894 | 2.43229  |
| H  | 0.50724  | -1.27316 | 2.67750  |
| C  | -2.47250 | -2.91093 | -0.06131 |
| H  | -3.54328 | -2.72378 | 0.05527  |
| H  | -2.18819 | -2.63995 | -1.07444 |
| H  | -2.31483 | -3.98663 | 0.03553  |
| C  | -4.07754 | 1.55732  | -1.51463 |
| H  | -4.06258 | 2.04433  | -0.54226 |
| H  | -3.54122 | 2.19894  | -2.21909 |
| H  | -5.11910 | 1.51215  | -1.83927 |
| C  | -1.01395 | 3.86048  | 1.56289  |
| H  | -0.35452 | 4.40028  | 2.24388  |
| H  | -0.88555 | 4.28793  | 0.56663  |
| H  | -2.04411 | 4.04559  | 1.88170  |
| C  | -1.98683 | -2.77855 | 2.38340  |
| H  | -1.79237 | -3.85188 | 2.37966  |
| H  | -1.38349 | -2.33378 | 3.17593  |
| H  | -3.04058 | -2.63302 | 2.63914  |
| C  | -0.75586 | 1.82563  | 3.00887  |
| H  | -1.78530 | 1.80783  | 3.37819  |
| H  | -0.33779 | 0.82545  | 3.10102  |
| H  | -0.17752 | 2.47039  | 3.67339  |
| C  | -3.75745 | -0.54425 | -2.83472 |
| H  | -4.82678 | -0.53973 | -3.05207 |
| H  | -3.25029 | -0.02676 | -3.65388 |
| H  | -3.41901 | -1.58139 | -2.83514 |

|   |         |          |          |
|---|---------|----------|----------|
| C | 2.17286 | -3.57510 | -2.42619 |
| H | 3.16471 | -3.99724 | -2.61386 |
| H | 1.63805 | -4.25627 | -1.75969 |
| H | 1.63280 | -3.54993 | -3.37775 |
| C | 3.08359 | -1.25629 | -2.73576 |
| H | 2.58608 | -1.13283 | -3.70275 |
| H | 3.21718 | -0.26320 | -2.30747 |
| H | 4.07587 | -1.67476 | -2.92254 |
| C | 2.09608 | 4.13126  | -1.41278 |
| H | 1.10398 | 4.55845  | -1.24569 |
| H | 2.83553 | 4.83407  | -1.01728 |
| H | 2.24655 | 4.05778  | -2.49398 |
| C | 3.64240 | 2.21467  | -0.93232 |
| H | 3.77550 | 1.25015  | -0.44036 |
| H | 3.87709 | 2.08409  | -1.99271 |
| H | 4.37778 | 2.90555  | -0.51226 |
| C | 2.32067 | -0.95366 | 3.73929  |
| H | 2.01780 | 0.01011  | 4.15546  |
| H | 2.13553 | -1.72214 | 4.49601  |
| H | 3.39881 | -0.91120 | 3.55967  |
| C | 1.95617 | -2.64106 | 1.92149  |
| H | 1.43782 | -2.89622 | 0.99697  |
| H | 3.02877 | -2.68564 | 1.71218  |
| H | 1.72901 | -3.41291 | 2.66128  |

### **iBu<sub>3</sub>NAlMe<sub>3</sub>**

53

iBu<sub>3</sub>NAlMe<sub>3</sub>

|    |          |          |          |
|----|----------|----------|----------|
| Al | -0.87810 | -1.04769 | 1.53537  |
| N  | 0.01338  | 0.17765  | -0.01765 |
| C  | 0.42809  | -0.65777 | -1.18859 |
| H  | 0.78535  | -0.00077 | -1.99083 |
| H  | -0.49097 | -1.11322 | -1.53973 |
| C  | 1.44627  | -1.79077 | -0.96156 |
| H  | 1.34155  | -2.15395 | 0.06158  |
| C  | -0.96054 | 1.22013  | -0.48412 |
| H  | -0.48328 | 1.80724  | -1.27369 |
| H  | -1.10581 | 1.88003  | 0.36817  |
| C  | -2.34621 | 0.77234  | -0.99536 |
| H  | -2.64168 | -0.13620 | -0.47056 |
| C  | 1.15747  | 0.84596  | 0.68860  |
| H  | 1.80941  | 0.04266  | 1.01746  |
| H  | 0.74287  | 1.28498  | 1.59917  |
| C  | 2.01105  | 1.91687  | -0.02871 |
| H  | 2.16128  | 1.61750  | -1.07029 |
| C  | -2.09326 | 0.22897  | 2.45806  |
| H  | -2.32403 | -0.18545 | 3.44643  |
| H  | -1.65741 | 1.21705  | 2.64346  |
| C  | 0.62236  | -1.60659 | 2.72210  |
| H  | 1.44848  | -2.14484 | 2.24715  |
| H  | 1.06041  | -0.77776 | 3.28743  |
| C  | -1.73335 | -2.57040 | 0.57824  |
| H  | -2.48662 | -3.01145 | 1.24184  |
| H  | -1.01870 | -3.36893 | 0.35615  |
| C  | 1.10211  | -2.94873 | -1.90728 |

|   |          |          |          |
|---|----------|----------|----------|
| H | 1.81273  | -3.76867 | -1.78991 |
| H | 0.10183  | -3.33690 | -1.71411 |
| H | 1.14491  | -2.62186 | -2.95076 |
| C | 2.89993  | -1.36647 | -1.18910 |
| H | 3.03827  | -1.00714 | -2.21285 |
| H | 3.22211  | -0.57774 | -0.51524 |
| H | 3.57122  | -2.21478 | -1.04353 |
| C | 1.41932  | 3.33384  | 0.00118  |
| H | 0.50494  | 3.43818  | -0.57675 |
| H | 1.19813  | 3.63081  | 1.02997  |
| H | 2.14049  | 4.04977  | -0.39833 |
| C | 3.38385  | 1.95874  | 0.66023  |
| H | 4.03076  | 2.70214  | 0.19169  |
| H | 3.27282  | 2.23260  | 1.71316  |
| H | 3.89736  | 0.99756  | 0.62346  |
| C | -2.39824 | 0.51270  | -2.50682 |
| H | -2.11152 | 1.41261  | -3.05869 |
| H | -1.74518 | -0.29532 | -2.83076 |
| H | -3.41407 | 0.25157  | -2.80914 |
| C | -3.35990 | 1.87051  | -0.64604 |
| H | -4.35670 | 1.60425  | -1.00171 |
| H | -3.41648 | 2.03499  | 0.42989  |
| H | -3.08264 | 2.81699  | -1.12034 |
| H | -2.25280 | -2.33764 | -0.35611 |
| H | 0.20340  | -2.29521 | 3.46642  |
| H | -3.05255 | 0.38719  | 1.95873  |

### **iBu<sub>3</sub>NAIPh<sub>3</sub>**

74

iBu<sub>3</sub>NAIPh<sub>3</sub>

|    |          |          |          |
|----|----------|----------|----------|
| Al | 0.09452  | 0.01759  | -0.86544 |
| N  | -0.06184 | 0.26262  | 1.27244  |
| C  | -0.23337 | -1.01035 | 2.04603  |
| H  | -0.38401 | -0.76352 | 3.10243  |
| H  | 0.72596  | -1.51193 | 1.97519  |
| C  | -1.28295 | -2.04566 | 1.60712  |
| H  | -1.19182 | -2.18988 | 0.53127  |
| C  | 1.18074  | 0.99077  | 1.75113  |
| H  | 0.95572  | 1.45969  | 2.70539  |
| H  | 1.32628  | 1.79868  | 1.03822  |
| C  | 2.49229  | 0.19142  | 1.91716  |
| H  | 2.46794  | -0.68453 | 1.27089  |
| C  | -1.23329 | 1.20147  | 1.39452  |
| H  | -2.00069 | 0.80417  | 0.73802  |
| H  | -0.91424 | 2.14834  | 0.95631  |
| C  | -1.90946 | 1.47941  | 2.75277  |
| H  | -2.16530 | 0.53015  | 3.22350  |
| C  | 1.68050  | -1.15983 | -1.08814 |
| C  | 2.83996  | -0.69296 | -1.72751 |
| C  | 1.72839  | -2.48243 | -0.61381 |
| C  | 3.98313  | -1.47742 | -1.86026 |
| H  | 2.85714  | 0.31003  | -2.13930 |
| C  | 2.86269  | -3.27810 | -0.73646 |
| H  | 0.85749  | -2.91614 | -0.13444 |

|   |          |          |          |
|---|----------|----------|----------|
| C | 4.00129  | -2.77239 | -1.35602 |
| H | 4.85909  | -1.07820 | -2.35843 |
| H | 2.85882  | -4.29239 | -0.35394 |
| H | 4.88883  | -3.38574 | -1.45351 |
| C | -1.59118 | -0.83408 | -1.52419 |
| C | -1.48261 | -2.07581 | -2.17619 |
| C | -2.88787 | -0.29718 | -1.45236 |
| C | -2.58622 | -2.74667 | -2.69573 |
| H | -0.50793 | -2.53899 | -2.28324 |
| C | -4.00190 | -0.95547 | -1.96427 |
| H | -3.05242 | 0.67119  | -0.99094 |
| C | -3.85525 | -2.19052 | -2.58527 |
| H | -2.45443 | -3.70258 | -3.18947 |
| H | -4.98334 | -0.50256 | -1.88257 |
| H | -4.71839 | -2.70835 | -2.98559 |
| C | 0.30094  | 1.89441  | -1.51618 |
| C | -0.77215 | 2.50690  | -2.18730 |
| C | 1.46852  | 2.66869  | -1.40344 |
| C | -0.69782 | 3.80348  | -2.68931 |
| H | -1.69251 | 1.95622  | -2.34048 |
| C | 1.56079  | 3.96502  | -1.90130 |
| H | 2.34577  | 2.25668  | -0.91946 |
| C | 0.47091  | 4.54143  | -2.54365 |
| H | -1.55086 | 4.23496  | -3.20031 |
| H | 2.48390  | 4.52266  | -1.79219 |
| H | 0.53537  | 5.54993  | -2.93389 |
| C | -0.91977 | -3.37167 | 2.29095  |
| H | -1.61651 | -4.15745 | 1.99582  |
| H | 0.08779  | -3.70050 | 2.02876  |
| H | -0.96844 | -3.27731 | 3.37994  |
| C | -1.09800 | 2.30184  | 3.75968  |
| H | -0.27511 | 1.73711  | 4.19707  |
| H | -0.68563 | 3.20171  | 3.29633  |
| H | -1.73995 | 2.61882  | 4.58436  |
| C | 3.67655  | 1.05035  | 1.46131  |
| H | 4.61899  | 0.53628  | 1.65682  |
| H | 3.62931  | 1.25299  | 0.39224  |
| H | 3.69979  | 2.00619  | 1.99288  |
| C | -3.22902 | 2.20033  | 2.43943  |
| H | -3.78339 | 2.40557  | 3.35648  |
| H | -3.04273 | 3.15567  | 1.94116  |
| H | -3.86934 | 1.60256  | 1.78786  |
| C | -2.74554 | -1.70848 | 1.90216  |
| H | -2.90972 | -1.56843 | 2.97391  |
| H | -3.09003 | -0.82137 | 1.37759  |
| H | -3.38233 | -2.53222 | 1.57566  |
| C | 2.71760  | -0.26048 | 3.36605  |
| H | 2.82286  | 0.60688  | 4.02441  |
| H | 1.90079  | -0.86945 | 3.75259  |
| H | 3.63409  | -0.84810 | 3.44490  |

### Ph<sub>3</sub>NAlMe<sub>3</sub>

47

Ph<sub>3</sub>NAlMe<sub>3</sub>

|    |          |          |          |
|----|----------|----------|----------|
| Al | -0.02308 | 0.04396  | 2.84689  |
| N  | 0.00466  | -0.01008 | -0.64604 |
| C  | 1.65951  | -0.96796 | 2.94497  |
| H  | 1.67884  | -1.58828 | 3.84828  |
| H  | 2.54842  | -0.33281 | 2.96590  |
| H  | 1.75586  | -1.65763 | 2.10090  |
| C  | -1.74194 | -0.90795 | 2.91163  |
| H  | -2.36062 | -0.66533 | 2.04231  |
| H  | -2.31750 | -0.59617 | 3.79063  |
| H  | -1.63601 | -1.99455 | 2.95928  |
| C  | 0.00962  | 2.00902  | 2.88740  |
| H  | 0.53584  | 2.36376  | 3.78090  |
| H  | -0.98633 | 2.45883  | 2.89499  |
| H  | 0.55764  | 2.41404  | 2.03138  |
| C  | -1.39544 | 0.20019  | -0.79647 |
| C  | -2.17019 | -0.62689 | -1.61238 |
| C  | -2.01739 | 1.24995  | -0.11365 |
| C  | -3.53975 | -0.41926 | -1.72206 |
| H  | -1.70141 | -1.43717 | -2.15306 |
| C  | -3.38180 | 1.45992  | -0.24021 |
| H  | -1.42552 | 1.89997  | 0.51504  |
| C  | -4.15510 | 0.62319  | -1.03957 |
| H  | -4.12507 | -1.07384 | -2.35568 |
| H  | -3.84489 | 2.27430  | 0.30260  |
| H  | -5.22172 | 0.78242  | -1.12851 |
| C  | 0.89064  | 1.09490  | -0.79214 |
| C  | 0.58227  | 2.16724  | -1.63138 |
| C  | 2.09493  | 1.11698  | -0.08204 |
| C  | 1.45141  | 3.24628  | -1.73808 |
| H  | -0.34141 | 2.15964  | -2.19303 |
| C  | 2.96383  | 2.19009  | -0.20526 |
| H  | 2.34569  | 0.28781  | 0.56425  |
| C  | 2.64608  | 3.26643  | -1.02854 |
| H  | 1.19328  | 4.07107  | -2.39049 |
| H  | 3.88818  | 2.19063  | 0.35855  |
| H  | 3.32082  | 4.10796  | -1.11510 |
| C  | 0.52267  | -1.33087 | -0.76984 |
| C  | 1.61524  | -1.60737 | -1.59405 |
| C  | -0.06467 | -2.37702 | -0.05205 |
| C  | 2.12047  | -2.89910 | -1.67821 |
| H  | 2.07380  | -0.80927 | -2.16105 |
| C  | 0.43552  | -3.66603 | -0.15301 |
| H  | -0.91565 | -2.17421 | 0.58262  |
| C  | 1.53612  | -3.93611 | -0.96097 |
| H  | 2.97142  | -3.09392 | -2.31888 |
| H  | -0.02973 | -4.46088 | 0.41626  |
| H  | 1.93156  | -4.94101 | -1.03004 |

### Pr<sub>3</sub>NAIEt<sub>3</sub>

53

Pr<sub>3</sub>NAIEt<sub>3</sub>

|    |          |          |          |
|----|----------|----------|----------|
| Al | 1.31324  | 0.24037  | -0.38235 |
| N  | -0.73847 | -0.16721 | 0.14427  |
| C  | -0.85195 | -0.99684 | 1.38892  |

|   |          |          |          |
|---|----------|----------|----------|
| H | -1.89887 | -1.00567 | 1.71560  |
| H | -0.29048 | -0.45642 | 2.14625  |
| C | -0.32268 | -2.43457 | 1.34220  |
| H | 0.58781  | -2.47834 | 0.74609  |
| C | -1.47728 | 1.11901  | 0.35660  |
| H | -2.53571 | 0.88798  | 0.51380  |
| H | -1.40055 | 1.68100  | -0.57423 |
| C | -1.01017 | 2.00064  | 1.51045  |
| H | -1.11340 | 1.47615  | 2.46170  |
| H | 0.04489  | 2.24320  | 1.39700  |
| C | -1.29097 | -0.84737 | -1.07375 |
| H | -0.72428 | -1.76462 | -1.19428 |
| H | -1.02509 | -0.21519 | -1.92264 |
| C | -2.80332 | -1.14290 | -1.11158 |
| H | -3.20040 | -1.23809 | -0.09878 |
| C | 1.19284  | 1.83622  | -1.58551 |
| H | 2.06825  | 1.70065  | -2.23666 |
| H | 0.34210  | 1.75591  | -2.27582 |
| C | 1.93231  | -1.34351 | -1.44540 |
| H | 1.76481  | -2.30680 | -0.95000 |
| H | 1.37383  | -1.40445 | -2.38811 |
| C | 2.34459  | 0.50654  | 1.30890  |
| H | 1.87380  | 1.22071  | 1.99332  |
| H | 3.24980  | 1.02651  | 0.96191  |
| H | -2.93397 | -2.12873 | -1.56347 |
| H | -0.01185 | -2.66881 | 2.36320  |
| C | 3.43421  | -1.22243 | -1.77443 |
| H | 4.04506  | -1.20346 | -0.86733 |
| H | 3.80145  | -2.05063 | -2.38970 |
| H | 3.65361  | -0.30059 | -2.32132 |
| C | 1.24280  | 3.25909  | -1.00634 |
| H | 2.06038  | 3.37224  | -0.28887 |
| H | 1.38315  | 4.02557  | -1.77601 |
| H | 0.32370  | 3.51707  | -0.47540 |
| C | 2.77808  | -0.73906 | 2.10072  |
| H | 3.23108  | -1.49360 | 1.45189  |
| H | 3.50802  | -0.50980 | 2.88425  |
| H | 1.93097  | -1.22186 | 2.59435  |
| C | -1.30979 | -3.51514 | 0.89666  |
| H | -2.23901 | -3.45679 | 1.46888  |
| H | -1.56767 | -3.45013 | -0.15889 |
| H | -0.88162 | -4.50497 | 1.06359  |
| C | -3.63097 | -0.13566 | -1.91238 |
| H | -3.58453 | 0.86842  | -1.49058 |
| H | -3.27131 | -0.07494 | -2.94205 |
| H | -4.68045 | -0.43422 | -1.94558 |
| C | -1.83526 | 3.28646  | 1.56058  |
| H | -1.50763 | 3.92541  | 2.38145  |
| H | -1.73657 | 3.85825  | 0.63542  |
| H | -2.89683 | 3.07187  | 1.70795  |

### Pr<sub>3</sub>NAl<sub>i</sub>Bu<sub>3</sub>

71

Pr<sub>3</sub>NAl<sub>i</sub>Bu<sub>3</sub>

|    |          |          |          |
|----|----------|----------|----------|
| Al | -0.49260 | -0.40098 | -0.26893 |
| N  | 1.39676  | 0.69784  | -0.04587 |
| C  | 1.32643  | 1.80887  | 0.95159  |
| H  | 2.33509  | 2.21018  | 1.10748  |
| H  | 1.01714  | 1.36427  | 1.89403  |
| C  | 0.37411  | 2.95004  | 0.62151  |
| H  | 0.68704  | 3.46332  | -0.28993 |
| H  | -0.62203 | 2.55506  | 0.43146  |
| C  | 2.49761  | -0.23700 | 0.35828  |
| H  | 3.45027  | 0.29926  | 0.30805  |
| H  | 2.53155  | -1.02802 | -0.38929 |
| C  | 2.37897  | -0.86303 | 1.74416  |
| H  | 2.47384  | -0.09905 | 2.51804  |
| H  | 1.39698  | -1.31634 | 1.87015  |
| C  | 1.68150  | 1.20641  | -1.42876 |
| H  | 0.81475  | 1.77920  | -1.74872 |
| H  | 1.72602  | 0.33087  | -2.07830 |
| C  | 2.93827  | 2.05353  | -1.63661 |
| H  | 3.83787  | 1.48397  | -1.39714 |
| H  | 2.92899  | 2.92039  | -0.97198 |
| C  | 0.17910  | -2.08711 | -1.13103 |
| H  | -0.58067 | -2.35541 | -1.87745 |
| H  | 1.05347  | -1.82623 | -1.74424 |
| C  | -1.54249 | 0.67923  | -1.59888 |
| H  | -1.46314 | 1.75768  | -1.41423 |
| H  | -1.08588 | 0.52994  | -2.58911 |
| C  | -1.30964 | -0.62368 | 1.54875  |
| H  | -0.68289 | -1.32481 | 2.11392  |
| H  | -2.21942 | -1.20690 | 1.33203  |
| C  | -3.04333 | 0.33735  | -1.72423 |
| H  | -3.51927 | 0.51328  | -0.75371 |
| C  | 0.50817  | -3.35501 | -0.31990 |
| H  | 1.11390  | -3.08125 | 0.55158  |
| C  | -1.72369 | 0.52198  | 2.49207  |
| H  | -0.86263 | 1.17914  | 2.65793  |
| C  | 0.31515  | 3.95347  | 1.77221  |
| H  | -0.35876 | 4.77721  | 1.53418  |
| H  | -0.04809 | 3.48174  | 2.68759  |
| H  | 1.30031  | 4.37784  | 1.98188  |
| C  | 3.01677  | 2.53121  | -3.08719 |
| H  | 3.90974  | 3.13514  | -3.25393 |
| H  | 3.05091  | 1.68659  | -3.77920 |
| H  | 2.14776  | 3.13886  | -3.35002 |
| C  | 3.46662  | -1.91747 | 1.94711  |
| H  | 3.40038  | -2.35687 | 2.94318  |
| H  | 3.37310  | -2.72582 | 1.21910  |
| H  | 4.46446  | -1.48444 | 1.83994  |
| C  | -2.84537 | 1.38041  | 1.90200  |
| H  | -2.57518 | 1.79626  | 0.93131  |
| H  | -3.74673 | 0.77813  | 1.75673  |
| H  | -3.10320 | 2.20962  | 2.56578  |
| C  | -2.14540 | -0.00530 | 3.86963  |
| H  | -1.33885 | -0.57571 | 4.33627  |
| H  | -2.42233 | 0.80703  | 4.54853  |
| H  | -3.00790 | -0.67129 | 3.77355  |
| C  | -3.74371 | 1.24439  | -2.74324 |
| H  | -3.31683 | 1.09975  | -3.74057 |



|   |          |          |          |
|---|----------|----------|----------|
| H | -4.81591 | 1.03487  | -2.80422 |
| H | -3.62052 | 2.29789  | -2.48052 |
| C | -3.27839 | -1.13365 | -2.08322 |
| H | -2.76879 | -1.38967 | -3.01687 |
| H | -2.90528 | -1.80912 | -1.31075 |
| H | -4.34305 | -1.34227 | -2.21590 |
| C | 1.32888  | -4.36133 | -1.13556 |
| H | 2.26961  | -3.91974 | -1.47516 |
| H | 1.56784  | -5.25777 | -0.55528 |
| H | 0.77287  | -4.67419 | -2.02426 |
| C | -0.76463 | -4.02341 | 0.20855  |
| H | -1.34593 | -3.34599 | 0.83457  |
| H | -1.40168 | -4.33639 | -0.62419 |
| H | -0.53207 | -4.91184 | 0.80143  |

### Pr<sub>3</sub>NAlMe<sub>3</sub>

44

Pr<sub>3</sub>NAlMe<sub>3</sub>

|    |          |          |          |
|----|----------|----------|----------|
| Al | 1.00601  | 1.14563  | 1.03653  |
| N  | -0.11143 | -0.32082 | -0.09457 |
| C  | -0.65509 | 0.26730  | -1.35699 |
| H  | -1.05329 | -0.53870 | -1.98498 |
| H  | 0.18893  | 0.69922  | -1.89054 |
| C  | -1.71654 | 1.34690  | -1.18221 |
| H  | -2.62439 | 0.92676  | -0.74406 |
| H  | -1.35746 | 2.10909  | -0.49080 |
| C  | -2.05409 | 1.98994  | -2.52664 |
| H  | -1.17650 | 2.47364  | -2.96110 |
| H  | -2.82999 | 2.74790  | -2.41213 |
| H  | -2.41633 | 1.24824  | -3.24322 |
| C  | 0.77087  | -1.48389 | -0.43035 |
| H  | 0.17053  | -2.25095 | -0.93006 |
| H  | 1.11113  | -1.90150 | 0.51721  |
| C  | 1.98347  | -1.17975 | -1.30453 |
| H  | 1.66586  | -0.87549 | -2.30384 |
| H  | 2.54962  | -0.34925 | -0.88606 |
| C  | 2.88299  | -2.41058 | -1.41291 |
| H  | 3.73716  | -2.21219 | -2.06152 |
| H  | 2.34216  | -3.26548 | -1.82719 |
| H  | 3.26830  | -2.70143 | -0.43313 |
| C  | -1.19597 | -0.78676 | 0.82833  |
| H  | -1.74971 | 0.09251  | 1.14824  |
| H  | -0.69814 | -1.17291 | 1.72035  |
| C  | -2.17804 | -1.83371 | 0.30041  |
| H  | -1.66168 | -2.76399 | 0.05704  |
| H  | -2.64648 | -1.48383 | -0.62255 |
| C  | -3.26135 | -2.11645 | 1.34172  |
| H  | -2.82611 | -2.48698 | 2.27275  |
| H  | -3.96652 | -2.86691 | 0.98176  |
| H  | -3.82664 | -1.21204 | 1.57831  |
| C  | 2.29761  | 0.00959  | 2.03907  |
| H  | 2.83669  | 0.64469  | 2.75168  |
| H  | 3.06012  | -0.48778 | 1.43227  |
| H  | 1.80826  | -0.76482 | 2.64112  |

|   |          |         |          |
|---|----------|---------|----------|
| C | -0.31719 | 2.01363 | 2.24586  |
| H | -1.17641 | 2.48289 | 1.75650  |
| H | 0.20231  | 2.81797 | 2.78096  |
| H | -0.71072 | 1.34151 | 3.01541  |
| C | 1.74034  | 2.37333 | -0.34822 |
| H | 2.39376  | 1.91057 | -1.09359 |
| H | 2.34311  | 3.13933 | 0.15393  |
| H | 0.96231  | 2.91528 | -0.89685 |

### Pr<sub>3</sub>NAIPh<sub>3</sub>

65

Pr<sub>3</sub>NAIPh<sub>3</sub>

|    |          |          |          |
|----|----------|----------|----------|
| Al | -0.11417 | 0.00842  | -0.56680 |
| N  | 0.12064  | -0.17918 | 1.59080  |
| C  | 0.88962  | 0.97747  | 2.15176  |
| H  | 0.82954  | 0.94588  | 3.24530  |
| H  | 0.37822  | 1.88115  | 1.82968  |
| C  | 2.34714  | 1.07349  | 1.72170  |
| H  | 2.93541  | 0.26706  | 2.16509  |
| H  | 2.41739  | 0.96628  | 0.64011  |
| C  | -1.22149 | -0.23892 | 2.26017  |
| H  | -1.07428 | -0.44532 | 3.32380  |
| H  | -1.74795 | -1.09018 | 1.83207  |
| C  | -2.09382 | 1.00480  | 2.12896  |
| H  | -1.70253 | 1.81138  | 2.75259  |
| H  | -2.08694 | 1.35903  | 1.10044  |
| C  | 0.82618  | -1.48510 | 1.82099  |
| H  | 1.74592  | -1.46643 | 1.24334  |
| H  | 0.20660  | -2.25949 | 1.36439  |
| C  | 1.15125  | -1.87684 | 3.26279  |
| H  | 0.24004  | -2.00947 | 3.84850  |
| H  | 1.72758  | -1.08801 | 3.75147  |
| C  | 0.37454  | 1.89767  | -0.97472 |
| C  | -0.31346 | 3.03462  | -0.51866 |
| C  | 1.49030  | 2.14436  | -1.79345 |
| C  | 0.08905  | 4.32891  | -0.83506 |
| H  | -1.19485 | 2.92318  | 0.10339  |
| C  | 1.90669  | 3.43274  | -2.11826 |
| H  | 2.05333  | 1.30895  | -2.19493 |
| C  | 1.20854  | 4.53284  | -1.63432 |
| H  | -0.47149 | 5.17771  | -0.46038 |
| H  | 2.77418  | 3.57735  | -2.75182 |
| H  | 1.52805  | 5.53769  | -1.88262 |
| C  | 1.13234  | -1.32971 | -1.36490 |
| C  | 2.53507  | -1.28500 | -1.28448 |
| C  | 0.59662  | -2.38736 | -2.11877 |
| C  | 3.35030  | -2.23145 | -1.89639 |
| H  | 3.02182  | -0.48811 | -0.73202 |
| C  | 1.39901  | -3.34356 | -2.73768 |
| H  | -0.47779 | -2.46878 | -2.23797 |
| C  | 2.78176  | -3.27105 | -2.62529 |
| H  | 4.42823  | -2.15660 | -1.80913 |
| H  | 0.94307  | -4.14285 | -3.31056 |
| H  | 3.41083  | -4.01128 | -3.10474 |

|   |          |          |          |
|---|----------|----------|----------|
| C | -2.02354 | -0.46655 | -0.86802 |
| C | -2.91729 | 0.48287  | -1.38884 |
| C | -2.56201 | -1.73364 | -0.58862 |
| C | -4.26385 | 0.19790  | -1.60030 |
| H | -2.55636 | 1.47630  | -1.63560 |
| C | -3.90554 | -2.03432 | -0.79222 |
| H | -1.91886 | -2.52032 | -0.20362 |
| C | -4.76417 | -1.06331 | -1.29695 |
| H | -4.92225 | 0.95881  | -2.00319 |
| H | -4.28235 | -3.02412 | -0.56139 |
| H | -5.81113 | -1.29005 | -1.45779 |
| C | 2.93485  | 2.42708  | 2.11731  |
| H | 3.99117  | 2.48476  | 1.85206  |
| H | 2.41543  | 3.23619  | 1.60010  |
| H | 2.85096  | 2.60054  | 3.19336  |
| C | 1.95612  | -3.17722 | 3.28216  |
| H | 1.39922  | -3.99237 | 2.81451  |
| H | 2.89676  | -3.06687 | 2.73804  |
| H | 2.19231  | -3.47713 | 4.30403  |
| C | -3.53523 | 0.68929  | 2.52539  |
| H | -4.15219 | 1.58813  | 2.49440  |
| H | -3.96953 | -0.03924 | 1.83818  |
| H | -3.59152 | 0.28092  | 3.53798  |

XYZ coordinates of the structures involved in the “Heart” mechanism

### Catalyst

35

Et<sub>3</sub>NAlMe<sub>3</sub>

|    |          |          |          |
|----|----------|----------|----------|
| Al | 1.42754  | -0.32425 | -0.21542 |
| N  | -0.65281 | 0.23436  | -0.00721 |
| C  | -1.18533 | -0.12201 | 1.34490  |
| H  | -2.17656 | 0.32968  | 1.46460  |
| H  | -0.52879 | 0.34820  | 2.07274  |
| C  | -1.25828 | -1.61157 | 1.64592  |
| H  | -1.97993 | -2.13330 | 1.01761  |
| H  | -0.28979 | -2.09343 | 1.52899  |
| C  | -0.81186 | 1.70955  | -0.22548 |
| H  | -1.87760 | 1.95420  | -0.19172 |
| H  | -0.45960 | 1.91422  | -1.23554 |
| C  | -0.07595 | 2.61065  | 0.75680  |
| H  | -0.46029 | 2.52258  | 1.77251  |
| H  | 0.99264  | 2.41202  | 0.77309  |
| C  | -1.36730 | -0.49438 | -1.10630 |
| H  | -1.14332 | -1.55110 | -0.99153 |
| H  | -0.89424 | -0.18205 | -2.03849 |
| C  | -2.87895 | -0.29999 | -1.20275 |
| H  | -3.16192 | 0.72770  | -1.42810 |
| H  | -3.39436 | -0.60493 | -0.29141 |
| C  | 2.06490  | 0.95833  | -1.59796 |
| H  | 3.08608  | 0.67972  | -1.88320 |
| H  | 2.10704  | 2.00693  | -1.28920 |
| H  | 1.47646  | 0.91720  | -2.52194 |
| C  | 1.41142  | -2.19793 | -0.89019 |
| H  | 0.86676  | -2.92367 | -0.27842 |
| H  | 2.45055  | -2.54779 | -0.92045 |
| H  | 1.03153  | -2.28769 | -1.91324 |

|   |          |          |          |
|---|----------|----------|----------|
| C | 2.16384  | -0.14082 | 1.62427  |
| H | 2.07577  | 0.85360  | 2.07128  |
| H | 3.23595  | -0.36833 | 1.59270  |
| H | 1.72684  | -0.85090 | 2.33460  |
| H | -3.25398 | -0.92605 | -2.01411 |
| H | -1.57261 | -1.73883 | 2.68299  |
| H | -0.21984 | 3.64569  | 0.44188  |

### Initiator

24

Initiator

|    |          |          |          |
|----|----------|----------|----------|
| S  | -1.29920 | 1.51719  | -0.31385 |
| C  | 1.30551  | 0.44754  | -0.56560 |
| C  | 1.70059  | -0.86928 | -0.79489 |
| C  | 1.98397  | 1.19018  | 0.40407  |
| C  | 2.74598  | -1.43619 | -0.07157 |
| H  | 1.18649  | -1.45817 | -1.54441 |
| C  | 3.02779  | 0.62906  | 1.12527  |
| H  | 1.67752  | 2.21068  | 0.60000  |
| C  | 3.41215  | -0.68920 | 0.89119  |
| H  | 3.03851  | -2.46106 | -0.26359 |
| H  | 3.54391  | 1.21924  | 1.87228  |
| H  | 4.22567  | -1.12753 | 1.45527  |
| Al | -2.28086 | -0.39071 | 0.15990  |
| C  | -1.66803 | -2.06321 | -0.65184 |
| H  | -0.79290 | -2.44990 | -0.12152 |
| H  | -2.44323 | -2.83280 | -0.61310 |
| H  | -1.37331 | -1.93498 | -1.69651 |
| C  | -3.79440 | -0.26550 | 1.39076  |
| H  | -4.70281 | -0.68024 | 0.94284  |
| H  | -3.60331 | -0.84331 | 2.30093  |
| H  | -4.00703 | 0.76272  | 1.69014  |
| C  | 0.17683  | 1.05755  | -1.34850 |
| H  | -0.14122 | 0.39485  | -2.15101 |
| H  | 0.48786  | 1.99900  | -1.80186 |

### Epoxide

10

Epoxide

|    |          |          |          |
|----|----------|----------|----------|
| C  | 2.14859  | 0.30310  | -0.01844 |
| H  | 2.31073  | 0.94292  | -0.88195 |
| H  | 2.98792  | 0.22164  | 0.66608  |
| C  | 0.78626  | 0.09234  | 0.48297  |
| H  | 0.64952  | -0.15878 | 1.53201  |
| C  | -0.37508 | 0.77720  | -0.16504 |
| H  | -0.19967 | 0.91134  | -1.23024 |
| H  | -0.57161 | 1.73996  | 0.30448  |
| Cl | -1.88832 | -0.19944 | 0.00474  |
| O  | 1.44573  | -0.91282 | -0.28350 |

### TS<sub>1</sub>

59

TS-1

|   |          |         |          |
|---|----------|---------|----------|
| N | -3.02072 | 0.66730 | -0.79893 |
| C | -2.32275 | 1.70617 | -0.05017 |
| H | -2.49851 | 1.53180 | 1.01160  |

|    |          |          |          |
|----|----------|----------|----------|
| H  | -1.25286 | 1.53888  | -0.21506 |
| C  | -2.64656 | 3.16521  | -0.39023 |
| H  | -3.69856 | 3.39330  | -0.21315 |
| H  | -2.05180 | 3.83298  | 0.23619  |
| H  | -2.41994 | 3.39857  | -1.43154 |
| C  | -2.71382 | 0.64087  | -2.22904 |
| H  | -3.27273 | -0.19658 | -2.65123 |
| H  | -3.08113 | 1.54353  | -2.74675 |
| C  | -1.23511 | 0.44449  | -2.53875 |
| H  | -0.83557 | -0.40602 | -1.98476 |
| H  | -1.10200 | 0.25659  | -3.60532 |
| H  | -0.63734 | 1.32232  | -2.28720 |
| C  | -4.46850 | 0.64063  | -0.57756 |
| H  | -4.85593 | -0.19758 | -1.15927 |
| H  | -4.95783 | 1.54389  | -0.98058 |
| C  | -4.87092 | 0.45212  | 0.87938  |
| H  | -5.94810 | 0.28834  | 0.94254  |
| H  | -4.36587 | -0.41190 | 1.31133  |
| H  | -4.64012 | 1.32474  | 1.49255  |
| Al | -1.77199 | -2.67704 | 0.40116  |
| C  | -1.97672 | -1.91689 | 2.20351  |
| H  | -2.11926 | -0.83432 | 2.13867  |
| H  | -2.85457 | -2.31786 | 2.72119  |
| H  | -1.10194 | -2.09321 | 2.83364  |
| C  | -3.31669 | -2.80299 | -0.81324 |
| H  | -3.09033 | -2.38892 | -1.80012 |
| H  | -3.57325 | -3.85658 | -0.97524 |
| H  | -4.20958 | -2.30006 | -0.43872 |
| C  | -0.19203 | -3.71210 | -0.16076 |
| H  | -0.44867 | -4.77321 | -0.26144 |
| H  | 0.16184  | -3.39340 | -1.14717 |
| H  | 0.64570  | -3.63290 | 0.53466  |
| Al | 0.68193  | 1.57797  | 1.22896  |
| C  | 1.29849  | 3.00134  | 0.03387  |
| H  | 1.22718  | 2.72366  | -1.02043 |
| H  | 0.71552  | 3.91468  | 0.17822  |
| H  | 2.34584  | 3.24910  | 0.22965  |
| C  | -0.16604 | 1.87734  | 2.96179  |
| H  | -0.89209 | 2.69405  | 2.91560  |
| H  | -0.68229 | 0.98379  | 3.31929  |
| H  | 0.57354  | 2.15222  | 3.72053  |
| S  | 0.95278  | -0.53719 | 0.67944  |
| C  | 1.96677  | -0.53174 | -0.87614 |
| H  | 1.76737  | -1.50366 | -1.32706 |
| H  | 1.58695  | 0.23263  | -1.55028 |
| C  | 3.43520  | -0.35128 | -0.62330 |
| C  | 4.18452  | -1.37551 | -0.04010 |
| C  | 4.07610  | 0.84105  | -0.95607 |
| C  | 5.53987  | -1.20944 | 0.20636  |
| H  | 3.69402  | -2.30341 | 0.22906  |
| C  | 5.43482  | 1.01136  | -0.70852 |
| H  | 3.50943  | 1.64238  | -1.41382 |
| C  | 6.17033  | -0.01274 | -0.12526 |
| H  | 6.10733  | -2.01397 | 0.65731  |
| H  | 5.91734  | 1.94353  | -0.97514 |
| H  | 7.22773  | 0.11706  | 0.06757  |

## Initiator and Catalyst Adduct

59

Initiator & Catalyst Adduct

|    |          |          |          |
|----|----------|----------|----------|
| N  | 2.59082  | 0.69464  | -0.35027 |
| C  | 3.48855  | 1.87953  | -0.14379 |
| H  | 2.87115  | 2.76937  | -0.24003 |
| H  | 3.82060  | 1.85003  | 0.89327  |
| C  | 4.68991  | 1.98394  | -1.07734 |
| H  | 4.39403  | 2.18627  | -2.10635 |
| H  | 5.31548  | 2.81482  | -0.74791 |
| H  | 5.30534  | 1.08463  | -1.07095 |
| C  | 3.31034  | -0.61625 | -0.11049 |
| H  | 2.53611  | -1.37282 | 0.00260  |
| H  | 3.85836  | -0.86766 | -1.02181 |
| C  | 4.26463  | -0.67038 | 1.07258  |
| H  | 3.79678  | -0.36424 | 2.00337  |
| H  | 4.58525  | -1.70623 | 1.19268  |
| H  | 5.15898  | -0.06797 | 0.91548  |
| C  | 2.09285  | 0.63297  | -1.77468 |
| H  | 1.48513  | -0.26559 | -1.85403 |
| H  | 2.95938  | 0.47237  | -2.42013 |
| C  | 1.30287  | 1.83414  | -2.26543 |
| H  | 1.03715  | 1.65491  | -3.30833 |
| H  | 0.37687  | 1.96949  | -1.71208 |
| H  | 1.87640  | 2.76038  | -2.22676 |
| Al | -0.23387 | -2.80732 | -0.30930 |
| C  | 0.80885  | -2.88825 | -2.00780 |
| H  | 1.86959  | -2.63477 | -1.91972 |
| H  | 0.77311  | -3.91792 | -2.38345 |
| H  | 0.38244  | -2.26036 | -2.79731 |
| C  | 0.72751  | -3.36335 | 1.34007  |
| H  | 0.23254  | -3.01038 | 2.25022  |
| H  | 0.75003  | -4.45799 | 1.40075  |
| H  | 1.76869  | -3.02993 | 1.39446  |
| C  | -2.10801 | -3.44876 | -0.45733 |
| H  | -2.10711 | -4.51808 | -0.69908 |
| H  | -2.68864 | -3.34476 | 0.46479  |
| H  | -2.66073 | -2.94531 | -1.25627 |
| Al | 1.00984  | 0.87564  | 0.99954  |
| C  | 1.42514  | 0.07756  | 2.74820  |
| H  | 2.18972  | 0.62784  | 3.30566  |
| H  | 0.51222  | 0.13640  | 3.35215  |
| H  | 1.70823  | -0.97501 | 2.72098  |
| C  | 0.49828  | 2.78103  | 1.09929  |
| H  | 1.30726  | 3.39425  | 1.51046  |
| H  | 0.17625  | 3.24517  | 0.16543  |
| H  | -0.33288 | 2.87825  | 1.80587  |
| S  | -0.62268 | -0.35870 | -0.09825 |
| C  | -2.00895 | -0.19205 | 1.14109  |
| H  | -2.24648 | -1.19820 | 1.47691  |
| H  | -1.63905 | 0.36929  | 1.99746  |
| C  | -3.20237 | 0.48068  | 0.53090  |
| C  | -4.21295 | -0.27369 | -0.06506 |
| C  | -3.30975 | 1.87191  | 0.52981  |
| C  | -5.30973 | 0.35039  | -0.64763 |
| H  | -4.13480 | -1.35345 | -0.07805 |

|   |          |          |          |
|---|----------|----------|----------|
| C | -4.40511 | 2.49729  | -0.05194 |
| H | -2.52698 | 2.46816  | 0.98252  |
| C | -5.40921 | 1.73742  | -0.64358 |
| H | -6.08751 | -0.24843 | -1.10488 |
| H | -4.47623 | 3.57787  | -0.04182 |
| H | -6.26412 | 2.22344  | -1.09660 |

## TS<sub>2</sub>

69

TS-2

|    |          |          |          |
|----|----------|----------|----------|
| N  | 3.77765  | -0.36995 | 0.35837  |
| C  | 4.83096  | -1.13199 | -0.35074 |
| H  | 4.62560  | -2.19036 | -0.19833 |
| H  | 4.69422  | -0.95880 | -1.41534 |
| C  | 6.28005  | -0.82174 | 0.03277  |
| H  | 6.46438  | -0.94859 | 1.10021  |
| H  | 6.94640  | -1.50182 | -0.50109 |
| H  | 6.56704  | 0.19538  | -0.23675 |
| C  | 3.94243  | 1.09383  | 0.17783  |
| H  | 3.10710  | 1.57272  | 0.68687  |
| H  | 4.84584  | 1.43135  | 0.70449  |
| C  | 4.00578  | 1.58043  | -1.26309 |
| H  | 3.16102  | 1.23198  | -1.85229 |
| H  | 3.99310  | 2.67159  | -1.26861 |
| H  | 4.91904  | 1.26196  | -1.76626 |
| C  | 3.75853  | -0.62803 | 1.82292  |
| H  | 2.79138  | -0.27481 | 2.18846  |
| H  | 4.51895  | -0.00730 | 2.31736  |
| C  | 3.96910  | -2.07446 | 2.25205  |
| H  | 3.73789  | -2.16241 | 3.31503  |
| H  | 3.32206  | -2.76171 | 1.71474  |
| H  | 5.00153  | -2.39601 | 2.11593  |
| Al | 1.39736  | -1.09796 | -0.61232 |
| C  | 2.21587  | -1.53789 | -2.36248 |
| H  | 2.94987  | -2.34357 | -2.26681 |
| H  | 1.45084  | -1.89949 | -3.05496 |
| H  | 2.72326  | -0.70557 | -2.85637 |
| C  | 0.96018  | -2.47815 | 0.73856  |
| H  | 1.15850  | -2.17415 | 1.76829  |
| H  | -0.11023 | -2.69499 | 0.68356  |
| H  | 1.48175  | -3.42462 | 0.56824  |
| C  | 0.74295  | 0.75886  | -0.17418 |
| H  | -0.34427 | 0.71981  | -0.25365 |
| H  | 1.02155  | 1.04274  | 0.83817  |
| H  | 1.19014  | 1.43161  | -0.90738 |
| Al | -0.34755 | 3.05661  | -0.38709 |
| C  | 0.38319  | 3.80662  | 1.27668  |
| H  | 1.47741  | 3.81249  | 1.25079  |
| H  | 0.05990  | 4.84354  | 1.41286  |
| H  | 0.08399  | 3.25854  | 2.17354  |
| C  | 0.33044  | 3.54654  | -2.16769 |
| H  | -0.06666 | 4.51675  | -2.48125 |
| H  | 1.42195  | 3.62219  | -2.18665 |
| H  | 0.04114  | 2.82320  | -2.93602 |
| S  | -2.53328 | 2.59213  | -0.47665 |
| C  | -3.03728 | 2.34444  | 1.29569  |

|    |          |          |          |
|----|----------|----------|----------|
| H  | -2.42855 | 2.98689  | 1.92938  |
| H  | -4.06660 | 2.69547  | 1.35549  |
| C  | -2.94116 | 0.91110  | 1.72964  |
| C  | -1.77643 | 0.41867  | 2.32191  |
| C  | -4.00081 | 0.02871  | 1.51329  |
| C  | -1.66802 | -0.91896 | 2.67910  |
| H  | -0.94445 | 1.08934  | 2.49603  |
| C  | -3.90010 | -1.30888 | 1.87721  |
| H  | -4.90518 | 0.38953  | 1.03876  |
| C  | -2.73091 | -1.78892 | 2.45775  |
| H  | -0.75277 | -1.28585 | 3.12406  |
| H  | -4.73148 | -1.97701 | 1.69282  |
| H  | -2.64670 | -2.83153 | 2.73733  |
| C  | -1.45343 | -0.75347 | -2.47497 |
| C  | -1.99652 | -1.31694 | -1.24318 |
| O  | -0.61483 | -1.54491 | -1.60325 |
| H  | -1.67099 | -1.22417 | -3.42719 |
| H  | -1.21706 | 0.30376  | -2.50174 |
| H  | -2.14383 | -0.65309 | -0.39965 |
| C  | -2.83595 | -2.55849 | -1.25908 |
| H  | -2.80069 | -3.06468 | -0.29776 |
| H  | -2.51350 | -3.23291 | -2.04903 |
| Cl | -4.56036 | -2.12957 | -1.57054 |

## IM<sub>1</sub>

69

IM-1

|    |         |          |          |
|----|---------|----------|----------|
| N  | 4.18529 | -0.43394 | 0.42933  |
| C  | 5.22927 | -0.88996 | -0.49343 |
| H  | 5.07697 | -1.95503 | -0.66836 |
| H  | 5.05323 | -0.41103 | -1.45703 |
| C  | 6.68012 | -0.64673 | -0.06106 |
| H  | 6.91046 | -1.14568 | 0.88207  |
| H  | 7.36355 | -1.03646 | -0.81825 |
| H  | 6.89434 | 0.41640  | 0.06220  |
| C  | 4.16127 | 1.01603  | 0.63045  |
| H  | 3.29558 | 1.23422  | 1.26227  |
| H  | 5.03772 | 1.36234  | 1.20483  |
| C  | 4.05757 | 1.82341  | -0.65798 |
| H  | 3.27539 | 1.42734  | -1.30579 |
| H  | 3.81502 | 2.86147  | -0.42565 |
| H  | 4.99279 | 1.82425  | -1.21893 |
| C  | 4.18158 | -1.11916 | 1.72464  |
| H  | 3.27196 | -0.80299 | 2.24339  |
| H  | 5.02260 | -0.78955 | 2.35939  |
| C  | 4.19602 | -2.63959 | 1.63061  |
| H  | 3.97916 | -3.06874 | 2.61018  |
| H  | 3.44015 | -2.99631 | 0.93147  |
| H  | 5.16679 | -3.02272 | 1.31340  |
| Al | 0.91505 | -1.38450 | -0.71367 |
| C  | 2.00154 | -1.90806 | -2.26761 |
| H  | 3.06620 | -1.74951 | -2.08380 |
| H  | 1.87010 | -2.96431 | -2.52298 |
| H  | 1.74342 | -1.32730 | -3.16008 |
| C  | 0.67352 | -2.51217 | 0.88896  |
| H  | 1.22726 | -2.13508 | 1.75299  |



|    |          |          |          |
|----|----------|----------|----------|
| H  | -0.37977 | -2.54190 | 1.18501  |
| H  | 0.99297  | -3.54596 | 0.72903  |
| C  | 0.67243  | 0.59085  | -0.41955 |
| H  | -0.30782 | 0.70589  | 0.04322  |
| H  | 1.46292  | 0.96542  | 0.22400  |
| H  | 0.73138  | 1.02281  | -1.42135 |
| Al | -0.06515 | 2.96827  | -0.54276 |
| C  | 0.69313  | 3.61228  | 1.15362  |
| H  | 1.78659  | 3.58938  | 1.11558  |
| H  | 0.40187  | 4.65013  | 1.34440  |
| H  | 0.39030  | 3.02939  | 2.02664  |
| C  | 0.67747  | 3.49456  | -2.28604 |
| H  | 0.51772  | 4.56260  | -2.46409 |
| H  | 1.75484  | 3.31416  | -2.34233 |
| H  | 0.21100  | 2.96279  | -3.12089 |
| S  | -2.29478 | 2.71864  | -0.66812 |
| C  | -2.85157 | 2.62392  | 1.10356  |
| H  | -2.17991 | 3.22475  | 1.71407  |
| H  | -3.83234 | 3.09723  | 1.12363  |
| C  | -2.93680 | 1.21971  | 1.62737  |
| C  | -1.85405 | 0.63130  | 2.28549  |
| C  | -4.09632 | 0.46212  | 1.45067  |
| C  | -1.92317 | -0.67754 | 2.74688  |
| H  | -0.94783 | 1.20397  | 2.43657  |
| C  | -4.17404 | -0.84403 | 1.91977  |
| H  | -4.94144 | 0.89765  | 0.93151  |
| C  | -3.08560 | -1.42069 | 2.56646  |
| H  | -1.06928 | -1.11804 | 3.24442  |
| H  | -5.08181 | -1.41354 | 1.76897  |
| H  | -3.14309 | -2.43805 | 2.93272  |
| C  | -1.76350 | -0.84553 | -2.33195 |
| C  | -2.24017 | -1.39663 | -1.06903 |
| O  | -0.89711 | -1.71502 | -1.54561 |
| H  | -2.07571 | -1.29112 | -3.26847 |
| H  | -1.46454 | 0.19473  | -2.35486 |
| H  | -2.26134 | -0.74038 | -0.20811 |
| C  | -3.15357 | -2.58452 | -1.03201 |
| H  | -3.14099 | -3.05733 | -0.05353 |
| H  | -2.87833 | -3.30397 | -1.79981 |
| Cl | -4.84536 | -2.05640 | -1.35433 |

### TS<sub>3</sub>

69

TS-3

|   |         |          |          |
|---|---------|----------|----------|
| N | 4.16420 | -0.18261 | 0.40267  |
| C | 5.23405 | -0.35801 | -0.58094 |
| H | 5.06614 | -1.30766 | -1.08943 |
| H | 5.10879 | 0.40585  | -1.34925 |
| C | 6.66978 | -0.31140 | -0.04369 |
| H | 6.84700 | -1.09070 | 0.69996  |
| H | 7.37974 | -0.46282 | -0.85948 |
| H | 6.89748 | 0.65049  | 0.41974  |
| C | 4.13683 | 1.12986  | 1.04553  |
| H | 3.24146 | 1.15409  | 1.67429  |
| H | 4.98763 | 1.26872  | 1.73564  |
| C | 4.08576 | 2.30134  | 0.07241  |

|    |          |          |          |
|----|----------|----------|----------|
| H  | 3.30976  | 2.14986  | -0.67918 |
| H  | 3.86106  | 3.22121  | 0.61360  |
| H  | 5.03364  | 2.44814  | -0.44661 |
| C  | 4.07243  | -1.24187 | 1.40880  |
| H  | 3.13659  | -1.07727 | 1.95233  |
| H  | 4.87784  | -1.15903 | 2.16015  |
| C  | 4.06761  | -2.65556 | 0.84120  |
| H  | 3.80243  | -3.36345 | 1.62793  |
| H  | 3.33798  | -2.75797 | 0.03857  |
| H  | 5.04488  | -2.94699 | 0.45401  |
| Al | 0.54518  | -1.78645 | -1.08656 |
| C  | 1.75363  | -2.26502 | -2.56710 |
| H  | 2.79688  | -2.05707 | -2.30793 |
| H  | 1.69413  | -3.32333 | -2.83887 |
| H  | 1.53374  | -1.68884 | -3.47241 |
| C  | 0.36923  | -2.92476 | 0.52665  |
| H  | 1.11479  | -2.66601 | 1.28495  |
| H  | -0.60905 | -2.82348 | 1.00591  |
| H  | 0.50642  | -3.98495 | 0.29252  |
| C  | 0.76364  | 0.20346  | -0.57174 |
| H  | -0.12792 | 0.40792  | 0.02556  |
| H  | 1.68940  | 0.33675  | -0.01860 |
| H  | 0.82134  | 0.67643  | -1.55376 |
| Al | 0.03031  | 2.52347  | -0.57074 |
| C  | 0.68791  | 3.31208  | 1.10586  |
| H  | 1.26715  | 2.60683  | 1.70630  |
| H  | 1.35143  | 4.14950  | 0.87127  |
| H  | -0.11003 | 3.70438  | 1.74134  |
| C  | 0.62518  | 3.13221  | -2.34288 |
| H  | 0.36764  | 4.18560  | -2.49007 |
| H  | 1.70949  | 3.04308  | -2.45777 |
| H  | 0.16617  | 2.57743  | -3.16713 |
| S  | -2.27310 | 2.27820  | -0.73271 |
| C  | -2.93012 | 2.22077  | 1.01001  |
| H  | -2.46058 | 3.05520  | 1.52979  |
| H  | -3.99222 | 2.43841  | 0.91541  |
| C  | -2.71943 | 0.93457  | 1.75561  |
| C  | -1.47744 | 0.61405  | 2.31030  |
| C  | -3.76462 | 0.02321  | 1.89861  |
| C  | -1.27297 | -0.60449 | 2.94279  |
| H  | -0.66272 | 1.32182  | 2.24343  |
| C  | -3.56568 | -1.19587 | 2.53797  |
| H  | -4.73623 | 0.25901  | 1.48754  |
| C  | -2.31541 | -1.51993 | 3.05070  |
| H  | -0.29750 | -0.84461 | 3.34517  |
| H  | -4.38939 | -1.89287 | 2.62992  |
| H  | -2.15243 | -2.47443 | 3.53391  |
| C  | -2.02239 | -0.08020 | -2.03408 |
| C  | -2.23055 | -1.14863 | -1.06285 |
| O  | -1.21811 | -1.79449 | -1.82064 |
| H  | -2.66021 | -0.02991 | -2.90729 |
| H  | -1.09617 | 0.44237  | -2.06813 |
| H  | -1.96781 | -0.93205 | -0.02996 |
| C  | -3.53237 | -1.92828 | -1.17992 |
| H  | -3.62491 | -2.63998 | -0.36429 |
| H  | -3.54731 | -2.45266 | -2.13222 |
| Cl | -4.99078 | -0.86766 | -1.14598 |

**IM<sub>2</sub>**

69

IM-2

|    |          |          |          |
|----|----------|----------|----------|
| N  | 3.69624  | -0.21854 | -0.32954 |
| C  | 3.98797  | 1.24245  | -0.14497 |
| H  | 3.06371  | 1.78577  | -0.34459 |
| H  | 4.20002  | 1.39687  | 0.91450  |
| C  | 5.12662  | 1.79746  | -0.99221 |
| H  | 5.00067  | 1.58254  | -2.05705 |
| H  | 5.13487  | 2.88424  | -0.87868 |
| H  | 6.10713  | 1.42610  | -0.68123 |
| C  | 4.93121  | -1.04422 | -0.11436 |
| H  | 4.64442  | -2.08716 | -0.27050 |
| H  | 5.65067  | -0.79040 | -0.90058 |
| C  | 5.59046  | -0.88241 | 1.24811  |
| H  | 4.91732  | -1.11699 | 2.07685  |
| H  | 6.43219  | -1.57709 | 1.30682  |
| H  | 5.98240  | 0.12554  | 1.40199  |
| C  | 3.21595  | -0.52846 | -1.72471 |
| H  | 2.74514  | -1.51789 | -1.67420 |
| H  | 4.09776  | -0.64437 | -2.36611 |
| C  | 2.27382  | 0.48672  | -2.35979 |
| H  | 1.87097  | 0.04914  | -3.27739 |
| H  | 1.42850  | 0.76436  | -1.72949 |
| H  | 2.79161  | 1.40710  | -2.63696 |
| Al | -1.21665 | 2.78532  | -0.49121 |
| C  | 0.77519  | 3.04177  | -0.18650 |
| H  | 1.19475  | 2.13751  | 0.28056  |
| H  | 1.34303  | 3.24138  | -1.10812 |
| H  | 0.97561  | 3.86935  | 0.50790  |
| C  | -2.21863 | 4.50631  | -0.42545 |
| H  | -1.88628 | 5.20705  | -1.20541 |
| H  | -3.29768 | 4.35441  | -0.56576 |
| H  | -2.09026 | 5.01558  | 0.53986  |
| C  | -1.55981 | 1.75254  | -2.19676 |
| H  | -2.54857 | 1.27070  | -2.20324 |
| H  | -1.54384 | 2.44509  | -3.05093 |
| H  | -0.81495 | 0.97134  | -2.40964 |
| Al | 2.33827  | -0.87402 | 1.09257  |
| C  | 2.58938  | -2.82580 | 1.22214  |
| H  | 3.52684  | -3.10068 | 1.71963  |
| H  | 1.78286  | -3.25532 | 1.83110  |
| H  | 2.56994  | -3.35204 | 0.25922  |
| C  | 2.33380  | 0.35217  | 2.61843  |
| H  | 3.33839  | 0.53726  | 3.01738  |
| H  | 1.89641  | 1.32665  | 2.37086  |
| H  | 1.74432  | -0.06727 | 3.44323  |
| S  | 0.17954  | -0.62847 | 0.08628  |
| C  | -0.25401 | -2.29406 | -0.58371 |
| H  | 0.35596  | -2.38871 | -1.48647 |
| H  | 0.06227  | -3.05396 | 0.13310  |
| C  | -1.72217 | -2.39538 | -0.88772 |
| C  | -2.26569 | -1.74409 | -1.99741 |
| C  | -2.57045 | -3.08108 | -0.01533 |
| C  | -3.63828 | -1.75728 | -2.21599 |

|    |          |          |          |
|----|----------|----------|----------|
| H  | -1.62226 | -1.17937 | -2.66537 |
| C  | -3.94581 | -3.09693 | -0.23479 |
| H  | -2.15593 | -3.59986 | 0.84593  |
| C  | -4.48182 | -2.42717 | -1.33135 |
| H  | -4.04991 | -1.22183 | -3.06488 |
| H  | -4.59744 | -3.62274 | 0.45560  |
| H  | -5.55471 | -2.41956 | -1.49218 |
| C  | -0.99426 | -0.43815 | 1.47631  |
| C  | -2.16851 | 0.47032  | 1.02256  |
| O  | -1.73271 | 1.75343  | 0.93373  |
| H  | -0.45482 | 0.07663  | 2.27486  |
| H  | -1.28242 | -1.44110 | 1.80530  |
| H  | -2.55897 | 0.07494  | 0.06797  |
| C  | -3.28231 | 0.30863  | 2.06355  |
| H  | -3.52254 | -0.74353 | 2.23654  |
| H  | -2.99478 | 0.79428  | 2.99849  |
| Cl | -4.80494 | 1.08747  | 1.51645  |

#### TS<sub>4</sub>

69

TS-4

|    |          |          |          |
|----|----------|----------|----------|
| Al | 0.32670  | -1.21166 | 1.31726  |
| C  | -0.10081 | -2.90860 | 0.23815  |
| H  | 0.87683  | -3.32137 | 0.09535  |
| H  | -0.66474 | -3.54523 | 0.88705  |
| H  | -0.59721 | -2.83130 | -0.70649 |
| C  | 0.85293  | -2.19143 | 2.88895  |
| H  | 1.83310  | -1.91118 | 3.21436  |
| H  | 0.14067  | -1.94380 | 3.64820  |
| H  | 0.82558  | -3.24546 | 2.70499  |
| S  | -1.79811 | -1.24852 | 0.80647  |
| C  | -2.16638 | -1.01942 | -0.92031 |
| H  | -1.70887 | -0.11579 | -1.26617 |
| H  | -1.78473 | -1.84853 | -1.47871 |
| C  | -3.69162 | -0.92895 | -1.11401 |
| C  | -4.33290 | 0.31603  | -1.05943 |
| C  | -4.43830 | -2.09212 | -1.34631 |
| C  | -5.72017 | 0.39779  | -1.23984 |
| H  | -3.76352 | 1.20351  | -0.88055 |
| C  | -5.82607 | -2.01031 | -1.52561 |
| H  | -3.94893 | -3.04305 | -1.38687 |
| C  | -6.46689 | -0.76555 | -1.47235 |
| H  | -6.20989 | 1.34837  | -1.20084 |
| H  | -6.39575 | -2.89822 | -1.70365 |
| H  | -7.52627 | -0.70289 | -1.60922 |
| C  | -2.26147 | 0.14594  | 1.74505  |
| C  | -1.20233 | 1.16403  | 1.28763  |
| O  | 0.09891  | 0.60126  | 1.54087  |
| H  | -2.18320 | -0.03022 | 2.79738  |
| H  | -3.26425 | 0.45172  | 1.53145  |
| H  | -1.26669 | 1.26193  | 0.22418  |
| C  | -1.42173 | 2.54243  | 1.93736  |
| H  | -0.66710 | 3.22104  | 1.59815  |
| H  | -1.36404 | 2.44828  | 3.00163  |
| Cl | -3.00826 | 3.15650  | 1.48720  |
| N  | 3.80010  | -0.61029 | -0.20499 |

|    |          |          |          |
|----|----------|----------|----------|
| C  | 3.75639  | -1.74452 | 0.72496  |
| H  | 3.75030  | -1.33006 | 1.73477  |
| H  | 2.79771  | -2.25346 | 0.59985  |
| C  | 4.84941  | -2.81763 | 0.61922  |
| H  | 4.82825  | -3.31809 | -0.34997 |
| H  | 5.85009  | -2.41550 | 0.76646  |
| H  | 4.67486  | -3.57880 | 1.38255  |
| C  | 3.96461  | -0.97466 | -1.61158 |
| H  | 4.00210  | -0.04519 | -2.18409 |
| H  | 4.92003  | -1.48592 | -1.80502 |
| C  | 2.82171  | -1.83566 | -2.13794 |
| H  | 1.86042  | -1.35093 | -1.96503 |
| H  | 2.93875  | -1.99375 | -3.21158 |
| H  | 2.79141  | -2.81681 | -1.66324 |
| C  | 4.64148  | 0.50685  | 0.22709  |
| H  | 4.26524  | 0.84769  | 1.19496  |
| H  | 4.47010  | 1.32852  | -0.47343 |
| C  | 6.15823  | 0.28881  | 0.32171  |
| H  | 6.65331  | 1.24464  | 0.50790  |
| H  | 6.42185  | -0.38220 | 1.13898  |
| H  | 6.56433  | -0.12192 | -0.60419 |
| Al | 2.09893  | 2.42007  | -1.37776 |
| C  | 2.06791  | 3.24268  | 0.39880  |
| H  | 1.71547  | 2.51825  | 1.13782  |
| H  | 3.04316  | 3.62240  | 0.71277  |
| H  | 1.37307  | 4.09092  | 0.42230  |
| C  | 3.51518  | 2.85564  | -2.67416 |
| H  | 3.70368  | 2.05251  | -3.39156 |
| H  | 3.19752  | 3.72530  | -3.26379 |
| H  | 4.46701  | 3.12665  | -2.21048 |
| C  | 0.58938  | 1.30686  | -1.96442 |
| H  | 0.71711  | 0.87131  | -2.95744 |
| H  | 0.46347  | 0.48998  | -1.25005 |
| H  | -0.34647 | 1.87599  | -1.96778 |

## Reformed Catalyst and Monomeric Species

69

Monomeric Species and Catalyst

|    |          |          |          |
|----|----------|----------|----------|
| Al | 0.62549  | -2.49797 | 0.00103  |
| C  | 0.71246  | -2.69717 | 1.95773  |
| H  | -0.15944 | -3.24856 | 2.32279  |
| H  | 1.59320  | -3.25923 | 2.28496  |
| H  | 0.71950  | -1.73789 | 2.48289  |
| C  | 0.13019  | -4.00296 | -1.15589 |
| H  | -0.95274 | -4.16817 | -1.12685 |
| H  | 0.39337  | -3.82655 | -2.20265 |
| H  | 0.59972  | -4.94229 | -0.84981 |
| S  | 2.97216  | -1.73179 | -0.61695 |
| C  | 3.60126  | -1.04074 | 0.98159  |
| H  | 2.75369  | -0.68222 | 1.56023  |
| H  | 4.00946  | -1.91281 | 1.49185  |
| C  | 4.63215  | 0.02772  | 0.77768  |
| C  | 4.28218  | 1.37300  | 0.89210  |
| C  | 5.94633  | -0.30341 | 0.44225  |
| C  | 5.22738  | 2.36984  | 0.67655  |
| H  | 3.26494  | 1.64531  | 1.14516  |

|    |          |          |          |
|----|----------|----------|----------|
| C  | 6.89178  | 0.69019  | 0.23074  |
| H  | 6.22573  | -1.34586 | 0.34333  |
| C  | 6.53347  | 2.03074  | 0.34587  |
| H  | 4.93935  | 3.40940  | 0.76503  |
| H  | 7.90890  | 0.42042  | -0.02376 |
| H  | 7.27053  | 2.80573  | 0.17871  |
| C  | 2.25471  | -0.25120 | -1.40560 |
| C  | 0.94571  | 0.15793  | -0.71584 |
| O  | 0.08907  | -0.93934 | -0.62316 |
| H  | 2.04984  | -0.55785 | -2.43297 |
| H  | 3.00008  | 0.54135  | -1.41581 |
| H  | 1.18160  | 0.56560  | 0.27787  |
| C  | 0.21828  | 1.25195  | -1.48752 |
| H  | -0.71598 | 1.49043  | -0.99143 |
| H  | 0.02406  | 0.94338  | -2.51331 |
| Cl | 1.18138  | 2.78127  | -1.54807 |
| N  | -4.08054 | -0.18077 | 0.10657  |
| C  | -3.23374 | -0.52499 | -1.07757 |
| H  | -3.18881 | 0.36293  | -1.70397 |
| H  | -2.22038 | -0.68753 | -0.71760 |
| C  | -3.69102 | -1.71504 | -1.91619 |
| H  | -4.62819 | -1.52100 | -2.43918 |
| H  | -2.92860 | -1.92186 | -2.66866 |
| H  | -3.81657 | -2.62138 | -1.32334 |
| C  | -4.12701 | -1.29806 | 1.11624  |
| H  | -4.49953 | -0.85676 | 2.04140  |
| H  | -4.88051 | -2.02174 | 0.78909  |
| C  | -2.82632 | -2.03942 | 1.38506  |
| H  | -2.01408 | -1.37334 | 1.65313  |
| H  | -2.99023 | -2.72063 | 2.22177  |
| H  | -2.51529 | -2.64327 | 0.53300  |
| C  | -5.50902 | 0.07130  | -0.27972 |
| H  | -6.03794 | 0.30873  | 0.64257  |
| H  | -5.93213 | -0.86601 | -0.65421 |
| C  | -5.74783 | 1.17330  | -1.29929 |
| H  | -6.82173 | 1.24066  | -1.48239 |
| H  | -5.40569 | 2.14275  | -0.94639 |
| H  | -5.26485 | 0.96744  | -2.25458 |
| Al | -3.28847 | 1.58513  | 1.04812  |
| C  | -2.93946 | 2.90447  | -0.41531 |
| H  | -2.88376 | 2.51679  | -1.43680 |
| H  | -3.70738 | 3.68566  | -0.42796 |
| H  | -1.98807 | 3.41624  | -0.23121 |
| C  | -4.78318 | 2.08257  | 2.26515  |
| H  | -5.10707 | 1.28748  | 2.94563  |
| H  | -4.44660 | 2.90667  | 2.90528  |
| H  | -5.67575 | 2.44624  | 1.74515  |
| C  | -1.60991 | 1.05846  | 1.97813  |
| H  | -1.10110 | 1.98801  | 2.26184  |
| H  | -1.76228 | 0.49359  | 2.90280  |
| H  | -0.90766 | 0.49330  | 1.36034  |

### IM<sub>3</sub>

79

IM-3

|   |          |          |          |
|---|----------|----------|----------|
| N | -5.15054 | -0.59185 | -0.13047 |
|---|----------|----------|----------|

|    |          |          |          |
|----|----------|----------|----------|
| C  | -5.99920 | -0.93534 | -1.27552 |
| H  | -6.06862 | -0.05493 | -1.91446 |
| H  | -5.47030 | -1.68172 | -1.86887 |
| C  | -7.40940 | -1.44494 | -0.95502 |
| H  | -7.98853 | -0.70815 | -0.39532 |
| H  | -7.94749 | -1.65579 | -1.88146 |
| H  | -7.38516 | -2.36581 | -0.36960 |
| C  | -4.83031 | -1.72881 | 0.73453  |
| H  | -4.13148 | -1.36367 | 1.49245  |
| H  | -5.71515 | -2.07629 | 1.29516  |
| C  | -4.20487 | -2.91156 | 0.00481  |
| H  | -3.40100 | -2.58349 | -0.65433 |
| H  | -3.78793 | -3.61406 | 0.72802  |
| H  | -4.93399 | -3.45595 | -0.59630 |
| C  | -5.64637 | 0.52677  | 0.67589  |
| H  | -4.85274 | 0.77674  | 1.38595  |
| H  | -6.51727 | 0.23095  | 1.28652  |
| C  | -6.00261 | 1.77080  | -0.12803 |
| H  | -6.15571 | 2.61260  | 0.54923  |
| H  | -5.20135 | 2.03453  | -0.81783 |
| H  | -6.92160 | 1.64082  | -0.70106 |
| Al | -2.02385 | 0.82263  | -1.19119 |
| C  | -2.76398 | 0.25525  | -2.92315 |
| H  | -3.77504 | -0.14292 | -2.81495 |
| H  | -2.81596 | 1.08269  | -3.63784 |
| H  | -2.16045 | -0.53270 | -3.38707 |
| C  | -2.48362 | 2.52619  | -0.30514 |
| H  | -3.13460 | 2.38405  | 0.56169  |
| H  | -1.58194 | 3.02542  | 0.06316  |
| H  | -2.98960 | 3.22697  | -0.97538 |
| C  | -1.39943 | -0.64373 | 0.03646  |
| H  | -0.57004 | -0.22434 | 0.60616  |
| H  | -2.21368 | -0.94978 | 0.68659  |
| H  | -1.09792 | -1.45019 | -0.63614 |
| Al | -0.14887 | -2.44026 | 1.13319  |
| C  | -1.14524 | -2.53325 | 2.82606  |
| H  | -2.16488 | -2.88938 | 2.64982  |
| H  | -0.67563 | -3.23901 | 3.51875  |
| H  | -1.22506 | -1.57725 | 3.34878  |
| C  | -0.26319 | -3.85650 | -0.22654 |
| H  | 0.19158  | -4.78075 | 0.14353  |
| H  | -1.29957 | -4.08778 | -0.48896 |
| H  | 0.26010  | -3.59637 | -1.15163 |
| S  | 1.78550  | -1.29178 | 0.85153  |
| C  | 1.83398  | -0.24843 | 2.37684  |
| H  | 1.19162  | -0.72611 | 3.11438  |
| H  | 2.85959  | -0.31230 | 2.73739  |
| C  | 1.43859  | 1.18567  | 2.17363  |
| C  | 0.11316  | 1.59578  | 2.33684  |
| C  | 2.38606  | 2.13970  | 1.79702  |
| C  | -0.25784 | 2.91761  | 2.12287  |
| H  | -0.63545 | 0.87193  | 2.63292  |
| C  | 2.02171  | 3.46534  | 1.59194  |
| H  | 3.41632  | 1.83736  | 1.65346  |
| C  | 0.69675  | 3.85886  | 1.75019  |
| H  | -1.29185 | 3.21224  | 2.24422  |
| H  | 2.77239  | 4.18706  | 1.29742  |

|    |          |          |          |
|----|----------|----------|----------|
| H  | 0.40985  | 4.89075  | 1.59086  |
| C  | 1.48931  | 0.41182  | -1.26156 |
| C  | 0.80259  | 1.73463  | -1.07943 |
| O  | -0.29308 | 1.49232  | -1.89366 |
| H  | 2.47678  | 0.33880  | -1.70785 |
| H  | 0.82871  | -0.41805 | -1.41220 |
| H  | 0.53643  | 1.90353  | -0.03875 |
| C  | 1.57837  | 3.05531  | -1.55508 |
| H  | 1.19894  | 3.85963  | -0.93042 |
| H  | 1.34905  | 3.25185  | -2.59996 |
| Cl | 3.37104  | 3.03564  | -1.37975 |
| C  | 4.95082  | -0.82600 | 0.76930  |
| C  | 5.14776  | -0.87331 | -0.66890 |
| O  | 4.15224  | -0.02804 | -0.12806 |
| H  | 4.41905  | -1.63685 | 1.25287  |
| H  | 5.64647  | -0.26548 | 1.38525  |
| H  | 6.00186  | -0.31584 | -1.04943 |
| C  | 4.95603  | -2.09651 | -1.58550 |
| H  | 5.20341  | -1.67947 | -2.55974 |
| H  | 4.12126  | -2.78659 | -1.68615 |
| Cl | 6.39542  | -3.04404 | -1.03951 |

## TS<sub>5</sub>

79

TS-5

|    |          |          |          |
|----|----------|----------|----------|
| N  | -5.11939 | -0.62319 | -0.14244 |
| C  | -5.96098 | -0.96677 | -1.29268 |
| H  | -6.03826 | -0.08208 | -1.92475 |
| H  | -5.42222 | -1.70252 | -1.89043 |
| C  | -7.36639 | -1.49436 | -0.98038 |
| H  | -7.95516 | -0.76849 | -0.41650 |
| H  | -7.89951 | -1.70366 | -1.91004 |
| H  | -7.33369 | -2.41959 | -0.40227 |
| C  | -4.78913 | -1.76348 | 0.71437  |
| H  | -4.09651 | -1.39680 | 1.47723  |
| H  | -5.67168 | -2.12514 | 1.26962  |
| C  | -4.14867 | -2.93341 | -0.02295 |
| H  | -3.34659 | -2.59126 | -0.67710 |
| H  | -3.72608 | -3.63708 | 0.69583  |
| H  | -4.87006 | -3.48091 | -0.63052 |
| C  | -5.62976 | 0.48341  | 0.67139  |
| H  | -4.84094 | 0.73636  | 1.38573  |
| H  | -6.49909 | 0.17316  | 1.27708  |
| C  | -5.99737 | 1.72987  | -0.12360 |
| H  | -6.16164 | 2.56447  | 0.55993  |
| H  | -5.19711 | 2.00790  | -0.80892 |
| H  | -6.91326 | 1.59443  | -0.70033 |
| Al | -2.00544 | 0.83396  | -1.18268 |
| C  | -2.73438 | 0.27242  | -2.92127 |
| H  | -3.74131 | -0.13767 | -2.81921 |
| H  | -2.79343 | 1.10495  | -3.62948 |
| H  | -2.12091 | -0.50511 | -3.38972 |
| C  | -2.48642 | 2.52520  | -0.28439 |
| H  | -3.13824 | 2.36898  | 0.57937  |
| H  | -1.59133 | 3.03133  | 0.09053  |
| H  | -2.99816 | 3.22576  | -0.95048 |



|    |          |          |          |
|----|----------|----------|----------|
| C  | -1.36842 | -0.63527 | 0.03503  |
| H  | -0.54531 | -0.21140 | 0.61048  |
| H  | -2.18110 | -0.95544 | 0.68030  |
| H  | -1.05617 | -1.43295 | -0.64312 |
| Al | -0.10130 | -2.42682 | 1.12102  |
| C  | -1.10137 | -2.54427 | 2.81016  |
| H  | -2.11654 | -2.91013 | 2.62810  |
| H  | -0.62599 | -3.25031 | 3.49856  |
| H  | -1.19320 | -1.59338 | 3.34026  |
| C  | -0.19619 | -3.83319 | -0.25032 |
| H  | 0.26766  | -4.75532 | 0.11365  |
| H  | -1.22923 | -4.07370 | -0.51762 |
| H  | 0.32679  | -3.55989 | -1.17180 |
| S  | 1.87175  | -1.24439 | 0.86275  |
| C  | 1.85364  | -0.22310 | 2.38791  |
| H  | 1.21461  | -0.71390 | 3.11974  |
| H  | 2.87901  | -0.27890 | 2.75097  |
| C  | 1.44329  | 1.20794  | 2.19505  |
| C  | 0.11294  | 1.60215  | 2.35766  |
| C  | 2.38124  | 2.17528  | 1.82882  |
| C  | -0.27196 | 2.92151  | 2.15317  |
| H  | -0.62850 | 0.86778  | 2.64574  |
| C  | 2.00293  | 3.49845  | 1.63330  |
| H  | 3.41517  | 1.88543  | 1.68587  |
| C  | 0.67329  | 3.87614  | 1.79082  |
| H  | -1.30949 | 3.20379  | 2.27385  |
| H  | 2.74647  | 4.23070  | 1.34675  |
| H  | 0.37551  | 4.90606  | 1.63890  |
| C  | 1.51224  | 0.46226  | -1.24601 |
| C  | 0.81042  | 1.77591  | -1.05516 |
| O  | -0.28014 | 1.52822  | -1.87474 |
| H  | 2.50169  | 0.40374  | -1.69004 |
| H  | 0.86119  | -0.37352 | -1.40542 |
| H  | 0.53958  | 1.93361  | -0.01415 |
| C  | 1.57302  | 3.10886  | -1.51823 |
| H  | 1.18302  | 3.90393  | -0.88822 |
| H  | 1.34454  | 3.31125  | -2.56212 |
| Cl | 3.36532  | 3.10745  | -1.33777 |
| C  | 4.41564  | -1.50689 | 0.79011  |
| C  | 4.90703  | -0.93475 | -0.47154 |
| O  | 4.03054  | 0.08063  | -0.62774 |
| H  | 4.16252  | -2.54755 | 0.92852  |
| H  | 4.50974  | -0.88834 | 1.66904  |
| H  | 5.94900  | -0.58543 | -0.32125 |
| C  | 5.00731  | -2.00542 | -1.58003 |
| H  | 5.25279  | -1.57771 | -2.55008 |
| H  | 4.18024  | -2.70344 | -1.68856 |
| Cl | 6.45536  | -2.94122 | -1.03733 |

#### IM<sub>4</sub>

79

IM-4

|   |         |          |          |
|---|---------|----------|----------|
| N | 4.85848 | -1.34597 | -0.50593 |
| C | 3.56609 | -1.86361 | 0.03422  |
| H | 3.62584 | -1.79068 | 1.11693  |
| H | 2.80339 | -1.14923 | -0.27236 |

|    |          |          |          |
|----|----------|----------|----------|
| C  | 3.12859  | -3.26866 | -0.36399 |
| H  | 3.88695  | -4.02023 | -0.14044 |
| H  | 2.23321  | -3.52127 | 0.20505  |
| H  | 2.87216  | -3.33426 | -1.42033 |
| C  | 4.86803  | -1.27508 | -2.00790 |
| H  | 3.87008  | -0.96332 | -2.31013 |
| H  | 5.54237  | -0.46171 | -2.27875 |
| C  | 5.28673  | -2.51800 | -2.79490 |
| H  | 4.70219  | -3.40211 | -2.55061 |
| H  | 5.13953  | -2.30558 | -3.85565 |
| H  | 6.34099  | -2.75717 | -2.65782 |
| C  | 6.04561  | -2.11130 | -0.02313 |
| H  | 6.91594  | -1.64722 | -0.48779 |
| H  | 5.99182  | -3.13719 | -0.39454 |
| C  | 6.24011  | -2.14286 | 1.48540  |
| H  | 7.14978  | -2.70586 | 1.70167  |
| H  | 6.35443  | -1.14571 | 1.90314  |
| H  | 5.41811  | -2.63943 | 2.00110  |
| Al | 4.92201  | 0.71922  | 0.09926  |
| C  | 4.18596  | 0.77905  | 1.94713  |
| H  | 3.12058  | 0.52987  | 1.98388  |
| H  | 4.69017  | 0.15005  | 2.68577  |
| H  | 4.27389  | 1.80791  | 2.31852  |
| C  | 6.85450  | 1.13844  | -0.11939 |
| H  | 7.24503  | 0.91961  | -1.11955 |
| H  | 7.00809  | 2.21255  | 0.03529  |
| H  | 7.50619  | 0.62913  | 0.59795  |
| C  | 3.70336  | 1.57188  | -1.22549 |
| H  | 3.45010  | 2.58493  | -0.89408 |
| H  | 4.13759  | 1.67449  | -2.22465 |
| H  | 2.75004  | 1.04609  | -1.34634 |
| Al | -0.09572 | -0.70035 | 0.62008  |
| C  | -0.01656 | -1.18876 | -1.29058 |
| H  | 0.98608  | -1.03108 | -1.70092 |
| H  | -0.26665 | -2.23896 | -1.47111 |
| H  | -0.69013 | -0.56999 | -1.88845 |
| C  | 0.38303  | -2.00940 | 2.01166  |
| H  | 1.46766  | -2.08322 | 2.13228  |
| H  | -0.01898 | -1.72017 | 2.98679  |
| H  | 0.01509  | -3.01778 | 1.79356  |
| S  | -2.61647 | -0.78040 | 1.13137  |
| C  | -3.26701 | -1.93115 | -0.15237 |
| H  | -2.93393 | -1.58647 | -1.12901 |
| H  | -2.74580 | -2.86435 | 0.06355  |
| C  | -4.75643 | -2.09347 | -0.08249 |
| C  | -5.58090 | -1.46600 | -1.01465 |
| C  | -5.34143 | -2.84923 | 0.93594  |
| C  | -6.96388 | -1.59033 | -0.93447 |
| H  | -5.14420 | -0.87193 | -1.80765 |
| C  | -6.72048 | -2.97828 | 1.01533  |
| H  | -4.70913 | -3.33135 | 1.67218  |
| C  | -7.53640 | -2.34677 | 0.07980  |
| H  | -7.59009 | -1.09215 | -1.66333 |
| H  | -7.16102 | -3.57094 | 1.80698  |
| H  | -8.61249 | -2.44523 | 0.14371  |
| C  | 0.35052  | 2.11395  | 0.36279  |
| O  | 0.33248  | 0.91455  | 1.07930  |

|    |          |         |          |
|----|----------|---------|----------|
| H  | 0.82887  | 1.99449 | -0.61692 |
| C  | 1.18078  | 3.09299 | 1.18586  |
| H  | 2.16130  | 2.66507 | 1.36481  |
| H  | 0.69996  | 3.30940 | 2.13825  |
| Cl | 1.43806  | 4.67281 | 0.33820  |
| C  | -3.46442 | 0.77778 | 0.72519  |
| C  | -3.07821 | 1.42150 | -0.60844 |
| O  | -1.69396 | 1.65587 | -0.74189 |
| H  | -3.23766 | 1.43659 | 1.56329  |
| H  | -4.53493 | 0.57740 | 0.74608  |
| H  | -3.31276 | 0.72643 | -1.41621 |
| C  | -3.86440 | 2.70958 | -0.86931 |
| H  | -3.48960 | 3.17933 | -1.77528 |
| H  | -3.79021 | 3.40983 | -0.03961 |
| Cl | -5.62052 | 2.37961 | -1.12536 |
| C  | -1.06872 | 2.60954 | 0.12456  |
| H  | -1.07159 | 3.59616 | -0.34427 |
| H  | -1.57887 | 2.67290 | 1.09097  |

### TS<sub>6</sub>

79

TS-6

|    |         |          |          |
|----|---------|----------|----------|
| N  | 3.66021 | -1.80759 | -1.37813 |
| C  | 2.99602 | -3.10431 | -1.51150 |
| H  | 2.48868 | -3.33010 | -0.56934 |
| H  | 2.20255 | -2.98337 | -2.25003 |
| C  | 3.85968 | -4.31735 | -1.88726 |
| H  | 4.60907 | -4.53219 | -1.12319 |
| H  | 3.22391 | -5.20137 | -1.97624 |
| H  | 4.37985 | -4.17974 | -2.83473 |
| C  | 3.76503 | -1.00824 | -2.59374 |
| H  | 2.76877 | -0.94766 | -3.03854 |
| H  | 4.02393 | 0.00978  | -2.28713 |
| C  | 4.76371 | -1.46393 | -3.66803 |
| H  | 4.46778 | -2.41144 | -4.11935 |
| H  | 4.81726 | -0.71888 | -4.46561 |
| H  | 5.76759 | -1.58220 | -3.25570 |
| C  | 4.85909 | -1.79323 | -0.55187 |
| H  | 5.28425 | -0.79062 | -0.61689 |
| H  | 5.64116 | -2.47521 | -0.92093 |
| C  | 4.57463 | -2.11469 | 0.91089  |
| H  | 5.48617 | -2.02836 | 1.50552  |
| H  | 3.81092 | -1.44052 | 1.31018  |
| H  | 4.19621 | -3.12926 | 1.04473  |
| Al | 4.84466 | 0.94939  | 2.28229  |
| C  | 3.06106 | 1.02289  | 3.09385  |
| H  | 2.26846 | 0.84828  | 2.36188  |
| H  | 2.94337 | 0.30161  | 3.90683  |
| H  | 2.87977 | 2.01669  | 3.52206  |
| C  | 6.37111 | 0.21834  | 3.28307  |
| H  | 6.81672 | 0.99167  | 3.92038  |
| H  | 6.07904 | -0.60077 | 3.94609  |
| H  | 7.16850 | -0.14377 | 2.62815  |
| C  | 5.15111 | 1.75719  | 0.51223  |
| H  | 5.04838 | 2.84777  | 0.54989  |
| H  | 6.14819 | 1.54460  | 0.11812  |

|    |          |          |          |
|----|----------|----------|----------|
| H  | 4.42215  | 1.40511  | -0.22372 |
| Al | 0.14421  | -0.75285 | 0.11245  |
| C  | -0.21050 | -1.35559 | -1.72899 |
| H  | 0.64812  | -1.13209 | -2.36791 |
| H  | -0.38492 | -2.43348 | -1.79666 |
| H  | -1.06418 | -0.84058 | -2.17470 |
| C  | 0.69296  | -2.00003 | 1.53082  |
| H  | 0.71374  | -1.50798 | 2.50719  |
| H  | 0.01364  | -2.85595 | 1.61173  |
| H  | 1.69004  | -2.40794 | 1.35370  |
| S  | -2.26392 | -0.56098 | 1.09094  |
| C  | -3.16587 | -1.84972 | 0.13131  |
| H  | -3.00070 | -1.67175 | -0.92917 |
| H  | -2.64285 | -2.76898 | 0.39676  |
| C  | -4.62412 | -1.91695 | 0.47385  |
| C  | -5.57649 | -1.36332 | -0.38036 |
| C  | -5.04830 | -2.50489 | 1.66743  |
| C  | -6.92765 | -1.39622 | -0.05179 |
| H  | -5.26359 | -0.89800 | -1.30688 |
| C  | -6.39597 | -2.54327 | 1.99497  |
| H  | -4.31431 | -2.92783 | 2.34320  |
| C  | -7.34024 | -1.98676 | 1.13568  |
| H  | -7.65392 | -0.95757 | -0.72394 |
| H  | -6.71194 | -3.00681 | 2.92091  |
| H  | -8.39139 | -2.01467 | 1.39279  |
| C  | 0.68429  | 2.02142  | -0.39216 |
| O  | 0.73018  | 0.86240  | 0.38161  |
| H  | 1.04671  | 1.84076  | -1.41381 |
| C  | 1.60995  | 3.02908  | 0.28412  |
| H  | 2.58927  | 2.58553  | 0.41631  |
| H  | 1.21840  | 3.32838  | 1.25466  |
| Cl | 1.84266  | 4.53465  | -0.69494 |
| C  | -3.11828 | 0.96178  | 0.58206  |
| C  | -2.87353 | 1.41274  | -0.85965 |
| O  | -1.50780 | 1.56821  | -1.18378 |
| H  | -2.78627 | 1.71606  | 1.29513  |
| H  | -4.18426 | 0.80959  | 0.74676  |
| H  | -3.22180 | 0.63140  | -1.53750 |
| C  | -3.64215 | 2.69344  | -1.19595 |
| H  | -3.36517 | 3.02584  | -2.19329 |
| H  | -3.44366 | 3.48833  | -0.47936 |
| Cl | -5.42659 | 2.42069  | -1.20017 |
| C  | -0.74136 | 2.55219  | -0.48840 |
| H  | -0.77198 | 3.50304  | -1.02634 |
| H  | -1.11298 | 2.70938  | 0.52897  |

### Dimeric Species

44

Dimeric Species

|    |         |         |          |
|----|---------|---------|----------|
| Al | 1.42416 | 2.25477 | 0.35990  |
| C  | 1.09716 | 2.07124 | 2.29314  |
| H  | 1.94564 | 2.46459 | 2.86396  |
| H  | 0.21810 | 2.63217 | 2.62612  |
| H  | 0.96918 | 1.02840 | 2.59268  |
| C  | 1.19678 | 3.99392 | -0.52860 |
| H  | 1.94607 | 4.71319 | -0.18157 |

|    |          |          |          |
|----|----------|----------|----------|
| H  | 1.30281  | 3.91708  | -1.61437 |
| H  | 0.21764  | 4.44198  | -0.32713 |
| S  | -0.68436 | 1.20946  | -0.69800 |
| C  | -1.94632 | 1.42684  | 0.62706  |
| H  | -1.55156 | 1.01296  | 1.55254  |
| H  | -1.99793 | 2.50953  | 0.74593  |
| C  | -3.27720 | 0.83993  | 0.26145  |
| C  | -3.69741 | -0.36460 | 0.82266  |
| C  | -4.10208 | 1.47533  | -0.66937 |
| C  | -4.91854 | -0.92570 | 0.46397  |
| H  | -3.06807 | -0.87264 | 1.54263  |
| C  | -5.32250 | 0.91986  | -1.02537 |
| H  | -3.77902 | 2.40674  | -1.11924 |
| C  | -5.73361 | -0.28474 | -0.45995 |
| H  | -5.22780 | -1.86422 | 0.90569  |
| H  | -5.95482 | 1.42537  | -1.74416 |
| H  | -6.68480 | -0.71913 | -0.73979 |
| C  | 3.30970  | 0.12320  | 0.04511  |
| O  | 2.69351  | 1.30630  | -0.36029 |
| H  | 3.58888  | 0.15107  | 1.10786  |
| C  | 4.58193  | -0.00628 | -0.78862 |
| H  | 5.18264  | 0.89043  | -0.66717 |
| H  | 4.34419  | -0.13956 | -1.84259 |
| Cl | 5.61217  | -1.40890 | -0.28538 |
| C  | -0.58184 | -0.60175 | -0.84018 |
| C  | 0.00002  | -1.33685 | 0.36930  |
| O  | 1.28025  | -0.87912 | 0.74885  |
| H  | 0.01796  | -0.77232 | -1.73412 |
| H  | -1.58690 | -0.96733 | -1.04731 |
| H  | -0.62550 | -1.13371 | 1.23981  |
| C  | 0.02037  | -2.85376 | 0.16041  |
| H  | 0.52621  | -3.32328 | 1.00045  |
| H  | 0.51937  | -3.13212 | -0.76589 |
| Cl | -1.64659 | -3.54141 | 0.08832  |
| C  | 2.37432  | -1.06338 | -0.15249 |
| H  | 2.87994  | -2.00810 | 0.06157  |
| H  | 2.04386  | -1.06623 | -1.19605 |
